# Supplementary material for: Prophages in the infant gut are largely induced, and may be functionally relevant to their hosts
Source: bioRxiv preprint, doi:10.1101/2021.06.25.449885, version 1 (2021-06-25)
Supplement: Supplementary Table 1 [file 449885_file03.xlsx]

## Sheet: Sheet1
Phage_name	Phage_start	Phage_stop	Phage_length	CheckV_qual	miuvig_qual	completeness	completeness_method	contamination	Predicted_Host_CRISPR	HMM_temperate	vCONTACT_VC	VC_Status
vOTU_00001	1	6085	6084	Low-quality	Genome-fragment	43.48	AAI-based (high-confidence)	0	Streptococcus	NONE	0	Singleton
vOTU_00002	1	17199	17198	Complete	High-quality	100	ITR (medium-confidence)	0	Eggerthella	NONE	783_0	Clustered
vOTU_00003	1	7951	7950	Low-quality	Genome-fragment	17.09	AAI-based (high-confidence)	0	None predicted	NONE	2308_0	Clustered
vOTU_00005	1	6930	6929	Not-determined	Genome-fragment	NA	NA	0	None predicted	NONE	0	Singleton
vOTU_00006	1	5588	5587	Low-quality	Genome-fragment	2.57	AAI-based (high-confidence)	0	None predicted	NONE	0	Singleton
vOTU_00007	1	4306	4305	Low-quality	Genome-fragment	1.98	AAI-based (high-confidence)	0	None predicted	NONE	2292_0	Clustered
vOTU_00008	1	88828	88827	Complete	High-quality	100	DTR (high-confidence)	0	Escherichia	NONE	354_16	Clustered
vOTU_00009	1	4895	4894	Low-quality	Genome-fragment	3.72	AAI-based (high-confidence)	0	Clostridioides	NONE	0	Outlier
vOTU_00010	1	4059	4058	Not-determined	Genome-fragment	NA	NA	0	Collinsella	NONE	0	Singleton
vOTU_00011	1	5514	5513	Low-quality	Genome-fragment	2.1	AAI-based (high-confidence)	0	None predicted	NONE	0	Outlier
vOTU_00012	1	4419	4418	Low-quality	Genome-fragment	10.96	AAI-based (high-confidence)	0	None predicted	YES	0	Outlier
vOTU_00013	1	4756	4755	Low-quality	Genome-fragment	11.16	AAI-based (high-confidence)	0	None predicted	YES	0	Outlier
vOTU_00016	1	6484	6483	Low-quality	Genome-fragment	6.84	AAI-based (medium-confidence)	0	None predicted	NONE	0	Singleton
vOTU_00017	1	4807	4806	Low-quality	Genome-fragment	4.34	AAI-based (high-confidence)	0	None predicted	YES	0	Singleton
vOTU_00018	1	4232	4231	Low-quality	Genome-fragment	4.14	AAI-based (high-confidence)	0	None predicted	YES	0	Outlier
vOTU_00019	1	4212	4211	Low-quality	Genome-fragment	3.79	AAI-based (high-confidence)	0	None predicted	YES	0	Overlap (VC_1106/VC_1109)
vOTU_00020	1	5435	5434	Not-determined	Genome-fragment	NA	NA	0	None predicted	YES	2270_0	Clustered
vOTU_00021	1	5569	5568	Low-quality	Genome-fragment	12.26	AAI-based (high-confidence)	0	Bacteroides	NONE	1790_0	Clustered
vOTU_00023	1	5062	5061	Low-quality	Genome-fragment	13.14	AAI-based (high-confidence)	0	Roseburia	YES	1842_0	Clustered
vOTU_00024	1	4423	4422	Low-quality	Genome-fragment	10.74	AAI-based (high-confidence)	0	None predicted	YES	0	Outlier
vOTU_00025	1	4022	4021	Low-quality	Genome-fragment	7.79	AAI-based (high-confidence)	0	None predicted	NONE	0	Outlier
vOTU_00026	1	4101	4100	Low-quality	Genome-fragment	3.27	AAI-based (high-confidence)	30.76	None predicted	YES	1813_0	Clustered
vOTU_00027	1	27104	27103	Low-quality	Genome-fragment	28.4	AAI-based (high-confidence)	0	None predicted	YES	0	Outlier
vOTU_00029	1	7480	7479	Low-quality	Genome-fragment	9.21	HMM-based (lower-bound)	0	None predicted	YES	2263_0	Clustered
vOTU_00031	1	7242	7241	Low-quality	Genome-fragment	7.59	AAI-based (high-confidence)	0	None predicted	YES	1115_0	Clustered
vOTU_00033	1	4415	4414	Low-quality	Genome-fragment	4.19	AAI-based (high-confidence)	0	None predicted	YES	#N/A	#N/A
vOTU_00040	1	5403	5402	Low-quality	Genome-fragment	24.35	AAI-based (high-confidence)	0	None predicted	YES	1483_0	Clustered
vOTU_00041	1	5269	5268	Low-quality	Genome-fragment	13.51	AAI-based (high-confidence)	0	Blautia	NONE	1957_0	Clustered
vOTU_00043	1	16384	16383	Medium-quality	Genome-fragment	88.99	AAI-based (medium-confidence)	0	None predicted	YES	0	Overlap (VC_1891/VC_1892/VC_1894)
vOTU_00044	1	10387	10386	Low-quality	Genome-fragment	11.44	AAI-based (high-confidence)	0	Salmonella	YES	0	Outlier
vOTU_00045	1	5128	5127	Low-quality	Genome-fragment	5.65	AAI-based (high-confidence)	0	None predicted	YES	0	Outlier
vOTU_00046	1	6819	6818	Low-quality	Genome-fragment	7.5	AAI-based (medium-confidence)	0	None predicted	YES	2282_0	Clustered
vOTU_00047	1	8247	8246	Low-quality	Genome-fragment	21.36	AAI-based (high-confidence)	0	Ruminococcus	NONE	0	Outlier
vOTU_00048	1	8046	8045	Low-quality	Genome-fragment	8.67	AAI-based (high-confidence)	0	None predicted	NONE	1110_0	Clustered
vOTU_00049	1	6142	6141	Low-quality	Genome-fragment	6.61	AAI-based (high-confidence)	0	None predicted	YES	0	Singleton
vOTU_00051	1	5087	5086	Not-determined	Genome-fragment	NA	NA	0	None predicted	YES	0	Singleton
vOTU_00052	1	34591	34590	Low-quality	Genome-fragment	37.87	AAI-based (high-confidence)	0	Escherichia	YES	0	Outlier
vOTU_00053	1	4585	4584	Not-determined	Genome-fragment	NA	NA	0	None predicted	NONE	0	Singleton
vOTU_00054	1	5971	5970	Low-quality	Genome-fragment	2.75	AAI-based (medium-confidence)	0	None predicted	YES	2291_0	Clustered
vOTU_00055	1	24551	24550	Medium-quality	Genome-fragment	85.1	AAI-based (high-confidence)	0	None predicted	YES	1933_0	Clustered
vOTU_00056	1	5068	5067	Not-determined	Genome-fragment	NA	NA	0	None predicted	NONE	2299_0	Clustered
vOTU_00057	1	4222	4221	Not-determined	Genome-fragment	NA	NA	0	None predicted	YES	0	Singleton
vOTU_00058	1	4083	4082	Low-quality	Genome-fragment	11.78	AAI-based (high-confidence)	0	None predicted	NONE	0	Outlier
vOTU_00060	1	4424	4423	Not-determined	Genome-fragment	NA	NA	0	None predicted	NONE	0	Singleton
vOTU_00065	1	5546	5545	Low-quality	Genome-fragment	5.04	AAI-based (high-confidence)	0	None predicted	YES	0	Overlap (VC_1106/VC_1109)
vOTU_00066	1	5008	5007	Low-quality	Genome-fragment	4.6	AAI-based (high-confidence)	0	None predicted	YES	0	Singleton
vOTU_00067	1	4433	4432	Low-quality	Genome-fragment	19.58	AAI-based (medium-confidence)	0	None predicted	NONE	0	Outlier
vOTU_00069	1	8070	8069	Low-quality	Genome-fragment	18.73	AAI-based (high-confidence)	0	None predicted	YES	2234_0	Clustered
vOTU_00070	1	16280	16279	Medium-quality	Genome-fragment	86.08	AAI-based (medium-confidence)	0	None predicted	NONE	0	Overlap (VC_1891/VC_1892/VC_1894)
vOTU_00071	1	5070	5069	Low-quality	Genome-fragment	12.3	AAI-based (high-confidence)	0	None predicted	YES	0	Singleton
vOTU_00073	1	10933	10932	Low-quality	Genome-fragment	9.5	AAI-based (high-confidence)	0	None predicted	NONE	2226_0	Clustered
vOTU_00074	1	7800	7799	Low-quality	Genome-fragment	27.03	AAI-based (medium-confidence)	0	None predicted	YES	0	Outlier
vOTU_00075	1	4829	4828	Low-quality	Genome-fragment	4.2	AAI-based (high-confidence)	0	None predicted	YES	0	Outlier
vOTU_00076	1	4818	4817	Low-quality	Genome-fragment	17.53	HMM-based (lower-bound)	0	None predicted	YES	2059_0	Clustered
vOTU_00077	1	4695	4694	Low-quality	Genome-fragment	15.18	AAI-based (high-confidence)	0	None predicted	YES	0	Outlier
vOTU_00078	1	4173	4172	Low-quality	Genome-fragment	12.21	AAI-based (high-confidence)	0	Roseburia	YES	0	Outlier
vOTU_00080	1	4017	4016	Low-quality	Genome-fragment	14.62	HMM-based (lower-bound)	0	None predicted	YES	2074_0	Clustered
vOTU_00081	1	11383	11382	Not-determined	Genome-fragment	NA	NA	0	None predicted	YES	2245_0	Clustered
vOTU_00082	1	8804	8803	Not-determined	Genome-fragment	NA	NA	0	None predicted	YES	2264_0	Clustered
vOTU_00083	1	6947	6946	Not-determined	Genome-fragment	NA	NA	0	None predicted	YES	2258_0	Clustered
vOTU_00084	1	11329	11328	Low-quality	Genome-fragment	12.42	AAI-based (high-confidence)	0	None predicted	YES	0	Outlier
vOTU_00086	1	5586	5585	Not-determined	Genome-fragment	NA	NA	0	None predicted	YES	0	Singleton
vOTU_00087	1	87819	87818	High-quality	High-quality	96.25	AAI-based (high-confidence)	0	Escherichia	YES	354_13	Clustered
vOTU_00088	1	7852	7851	Low-quality	Genome-fragment	20.36	AAI-based (high-confidence)	0	Roseburia	YES	0	Outlier
vOTU_00089	1	5544	5543	Not-determined	Genome-fragment	NA	NA	0	None predicted	YES	0	Singleton
vOTU_00090	1	4525	4524	Low-quality	Genome-fragment	10.94	AAI-based (high-confidence)	0	None predicted	YES	0	Outlier
vOTU_00091	1	14841	14840	Not-determined	Genome-fragment	NA	NA	0	None predicted	YES	0	Singleton
vOTU_00092	1	9028	9027	Low-quality	Genome-fragment	11.12	HMM-based (lower-bound)	0	None predicted	YES	2263_0	Clustered
vOTU_00093	1	5976	5975	Not-determined	Genome-fragment	NA	NA	0	None predicted	YES	0	Singleton
vOTU_00094	1	4703	4702	Not-determined	Genome-fragment	NA	NA	0	None predicted	YES	2258_0	Clustered
vOTU_00095	1	4137	4136	Low-quality	Genome-fragment	22.72	AAI-based (high-confidence)	0	Bifidobacterium	NONE	0	Outlier
vOTU_00096	1	17068	17067	Low-quality	Genome-fragment	41.56	AAI-based (high-confidence)	0	Enterococcus	NONE	0	Outlier
vOTU_00097	1	87780	87779	Complete	High-quality	100	DTR (high-confidence)	0	Escherichia	YES	354_13	Clustered
vOTU_00098	1	5114	5113	Low-quality	Genome-fragment	12.67	AAI-based (high-confidence)	0	None predicted	YES	2026_0	Clustered
vOTU_00099	1	4389	4388	Low-quality	Genome-fragment	8.64	AAI-based (high-confidence)	0	Ruminococcus	YES	0	Singleton
vOTU_00102	1	19584	19583	Low-quality	Genome-fragment	29.83	AAI-based (high-confidence)	0	None predicted	YES	0	Outlier
vOTU_00103	1	7325	7324	Low-quality	Genome-fragment	33.02	AAI-based (high-confidence)	0	None predicted	NONE	0	Outlier
vOTU_00104	1	6982	6981	Low-quality	Genome-fragment	14.35	AAI-based (high-confidence)	0	None predicted	NONE	0	Singleton
vOTU_00105	1	6023	6022	Low-quality	Genome-fragment	9.04	AAI-based (high-confidence)	0	None predicted	YES	0	Outlier
vOTU_00106	1	5707	5706	Low-quality	Genome-fragment	11.59	AAI-based (high-confidence)	0	None predicted	YES	0	Singleton
vOTU_00108	1	4479	4478	Low-quality	Genome-fragment	6.75	AAI-based (high-confidence)	0	None predicted	YES	0	Singleton
vOTU_00109	1	17205	17204	Medium-quality	Genome-fragment	86.8	AAI-based (medium-confidence)	0	Eubacterium	YES	1893_0	Clustered
vOTU_00110	1	14186	14185	Medium-quality	Genome-fragment	76.09	AAI-based (medium-confidence)	0	Eubacterium	NONE	1893_0	Clustered
vOTU_00111	1	13288	13287	Low-quality	Genome-fragment	29.35	AAI-based (high-confidence)	0	Parabacteroides	YES	1028_0	Clustered
vOTU_00113	1	4833	4832	Low-quality	Genome-fragment	10.56	AAI-based (high-confidence)	0	Bacteroides	YES	1789_0	Clustered
vOTU_00114	1	33490	33489	Low-quality	Genome-fragment	33.44	AAI-based (high-confidence)	0	None predicted	YES	0	Outlier
vOTU_00115	1	5182	5181	Low-quality	Genome-fragment	8.82	AAI-based (high-confidence)	0	Neisseria	YES	0	Singleton
vOTU_00116	1	6298	6297	Low-quality	Genome-fragment	7.39	AAI-based (high-confidence)	0	None predicted	YES	0	Outlier
vOTU_00118	1	4603	4602	Low-quality	Genome-fragment	5.33	AAI-based (high-confidence)	0	None predicted	YES	0	Outlier
vOTU_00119	1	12175	12174	Low-quality	Genome-fragment	15	HMM-based (lower-bound)	0	None predicted	YES	2263_0	Clustered
vOTU_00120	1	5530	5529	Not-determined	Genome-fragment	NA	NA	0	None predicted	YES	0	Singleton
vOTU_00121	1	5200	5199	Low-quality	Genome-fragment	10.31	AAI-based (high-confidence)	0	Ruminococcus	YES	0	Outlier
vOTU_00122	1	5539	5538	Low-quality	Genome-fragment	16.52	AAI-based (high-confidence)	0	None predicted	NONE	2268_0	Clustered
vOTU_00123	1	61527	61526	Medium-quality	Genome-fragment	61.66	AAI-based (high-confidence)	0	None predicted	NONE	946_5	Clustered
vOTU_00124	1	4647	4646	Low-quality	Genome-fragment	11.26	AAI-based (high-confidence)	0	Veillonella	NONE	2021_0	Clustered
vOTU_00125	1	4609	4608	Low-quality	Genome-fragment	11.13	AAI-based (high-confidence)	0	None predicted	NONE	0	Singleton
vOTU_00126	1	6785	6784	Low-quality	Genome-fragment	17.63	AAI-based (high-confidence)	0	Roseburia	NONE	1842_0	Clustered
vOTU_00127	1	4818	4817	Low-quality	Genome-fragment	1.88	AAI-based (high-confidence)	60.83	None predicted	YES	0	Outlier
vOTU_00128	1	8447	8446	Not-determined	Genome-fragment	NA	NA	0	None predicted	NONE	2263_0	Clustered
vOTU_00129	1	19481	19480	Medium-quality	Genome-fragment	50.46	AAI-based (high-confidence)	0	Ruminococcus	NONE	1839_0	Clustered
vOTU_00130	1	14435	14434	Low-quality	Genome-fragment	8.16	AAI-based (high-confidence)	0	None predicted	NONE	0	Outlier
vOTU_00131	1	11322	11321	Low-quality	Genome-fragment	6.42	AAI-based (high-confidence)	0	Ruminococcus	YES	2269_0	Clustered
vOTU_00132	1	7389	7388	Low-quality	Genome-fragment	4.27	AAI-based (high-confidence)	0	Ruminococcus	YES	0	Singleton
vOTU_00134	1	7491	7490	Low-quality	Genome-fragment	5.12	AAI-based (medium-confidence)	0	None predicted	YES	0	Singleton
vOTU_00135	1	5524	5523	Not-determined	Genome-fragment	NA	NA	0	None predicted	YES	2270_0	Clustered
vOTU_00136	1	5828	5827	Low-quality	Genome-fragment	4.68	AAI-based (medium-confidence)	0	None predicted	YES	2258_0	Clustered
vOTU_00137	1	6328	6327	Low-quality	Genome-fragment	17.5	AAI-based (high-confidence)	0	None predicted	NONE	0	Outlier
vOTU_00138	1	8042	8041	Not-determined	Genome-fragment	NA	NA	0	None predicted	YES	0	Singleton
vOTU_00139	1	45424	45423	High-quality	High-quality	100	AAI-based (high-confidence)	0	Bacteroides	YES	1026_0	Clustered
vOTU_00143	1	5634	5633	Low-quality	Genome-fragment	14.59	AAI-based (high-confidence)	0	Ruminococcus	NONE	0	Outlier
vOTU_00144	1	5127	5126	Low-quality	Genome-fragment	5.95	AAI-based (high-confidence)	0	None predicted	YES	1813_0	Clustered
vOTU_00145	1	4978	4977	Low-quality	Genome-fragment	12.86	AAI-based (high-confidence)	0	Roseburia	YES	0	Outlier
vOTU_00146	1	4922	4921	Low-quality	Genome-fragment	12.75	AAI-based (high-confidence)	0	Roseburia	YES	0	Outlier
vOTU_00147	1	9781	9780	Low-quality	Genome-fragment	11.68	AAI-based (high-confidence)	0	None predicted	YES	0	Outlier
vOTU_00149	1	11590	11589	Low-quality	Genome-fragment	28.3	AAI-based (high-confidence)	0	None predicted	NONE	0	Outlier
vOTU_00150	1	4345	4344	Low-quality	Genome-fragment	15.33	HMM-based (lower-bound)	0	None predicted	YES	2074_0	Clustered
vOTU_00151	1	72250	72249	Medium-quality	Genome-fragment	82.7	AAI-based (medium-confidence)	0	Veillonella	YES	819_0	Clustered
vOTU_00152	1	4559	4558	Low-quality	Genome-fragment	8.71	AAI-based (high-confidence)	0	Ruminococcus	YES	2276_0	Clustered
vOTU_00153	1	5427	5426	Not-determined	Genome-fragment	NA	NA	0	None predicted	NONE	2277_0	Clustered
vOTU_00156	1	11889	11888	Low-quality	Genome-fragment	13.05	AAI-based (high-confidence)	0	None predicted	NONE	1113_0	Clustered
vOTU_00158	1	4522	4521	Low-quality	Genome-fragment	31.86	AAI-based (high-confidence)	0	Streptococcus	NONE	0	Outlier
vOTU_00159	1	9680	9679	Not-determined	Genome-fragment	NA	NA	0	None predicted	NONE	2258_0	Clustered
vOTU_00162	1	15810	15809	Not-determined	Genome-fragment	NA	NA	0	None predicted	NONE	0	Singleton
vOTU_00164	1	4263	4262	Low-quality	Genome-fragment	12.29	AAI-based (high-confidence)	0	None predicted	NONE	0	Outlier
vOTU_00165	1	6394	6393	Low-quality	Genome-fragment	5.63	AAI-based (high-confidence)	0	None predicted	NONE	0	Outlier
vOTU_00166	1	8062	8061	Low-quality	Genome-fragment	20	AAI-based (high-confidence)	0	None predicted	NONE	0	Outlier
vOTU_00167	1	7883	7882	Low-quality	Genome-fragment	11.48	AAI-based (high-confidence)	0	None predicted	NONE	2278_0	Clustered
vOTU_00168	1	6786	6785	Low-quality	Genome-fragment	10.11	AAI-based (high-confidence)	0	None predicted	NONE	0	Outlier
vOTU_00169	1	4335	4334	Low-quality	Genome-fragment	6.3	AAI-based (high-confidence)	0	None predicted	NONE	0	Outlier
vOTU_00170	1	31503	31502	Low-quality	Genome-fragment	36.06	AAI-based (high-confidence)	0	None predicted	YES	0	Outlier
vOTU_00172	1	9300	9299	Low-quality	Genome-fragment	10.66	AAI-based (high-confidence)	0	None predicted	NONE	0	Outlier
vOTU_00173	1	17159	17158	Low-quality	Genome-fragment	15.65	AAI-based (high-confidence)	0	None predicted	NONE	1103_0	Clustered
vOTU_00174	1	16051	16050	Low-quality	Genome-fragment	14.8	AAI-based (high-confidence)	0	None predicted	YES	1104_0	Clustered
vOTU_00176	1	7994	7993	Low-quality	Genome-fragment	7.53	AAI-based (high-confidence)	0	None predicted	YES	1105_0	Clustered
vOTU_00177	1	6271	6270	Low-quality	Genome-fragment	5.71	AAI-based (high-confidence)	0	None predicted	YES	1106_0	Clustered
vOTU_00178	1	6429	6428	Low-quality	Genome-fragment	6.24	AAI-based (high-confidence)	0	None predicted	YES	0	Outlier
vOTU_00180	1	5449	5448	Low-quality	Genome-fragment	5.98	AAI-based (high-confidence)	0	None predicted	YES	#N/A	#N/A
vOTU_00181	1	4796	4795	Not-determined	Genome-fragment	NA	NA	0	None predicted	YES	0	Singleton
vOTU_00182	1	4498	4497	Low-quality	Genome-fragment	4.62	AAI-based (high-confidence)	0	None predicted	YES	#N/A	#N/A
vOTU_00184	1	4498	4497	Low-quality	Genome-fragment	11.8	AAI-based (high-confidence)	0	None predicted	NONE	2281_0	Clustered
vOTU_00188	1	4528	4527	Low-quality	Genome-fragment	10.48	AAI-based (high-confidence)	0	None predicted	NONE	0	Outlier
vOTU_00189	1	9393	9392	Low-quality	Genome-fragment	6.57	AAI-based (medium-confidence)	0	None predicted	YES	0	Singleton
vOTU_00191	1	4417	4416	Low-quality	Genome-fragment	9.7	AAI-based (medium-confidence)	0	None predicted	NONE	0	Overlap (VC_983/VC_2287)
vOTU_00192	1	4929	4928	Low-quality	Genome-fragment	9.42	AAI-based (high-confidence)	0	Ruminococcus	NONE	2276_0	Clustered
vOTU_00193	1	4390	4389	Low-quality	Genome-fragment	5.54	AAI-based (high-confidence)	0	None predicted	YES	0	Outlier
vOTU_00194	1	90891	90890	Complete	High-quality	100	DTR (high-confidence)	0	None predicted	YES	946_5	Clustered
vOTU_00195	1	7321	7320	Low-quality	Genome-fragment	25.37	AAI-based (medium-confidence)	0	None predicted	YES	2288_0	Clustered
vOTU_00196	1	5217	5216	Low-quality	Genome-fragment	15.47	AAI-based (high-confidence)	0	None predicted	YES	0	Singleton
vOTU_00197	1	44110	44109	High-quality	High-quality	97.39	AAI-based (high-confidence)	0	Bacteroides	NONE	1026_0	Clustered
vOTU_00198	1	28401	28400	High-quality	High-quality	98.45	AAI-based (high-confidence)	0	None predicted	NONE	1933_0	Clustered
vOTU_00199	1	7028	7027	Low-quality	Genome-fragment	3.87	AAI-based (high-confidence)	0	None predicted	YES	2271_0	Clustered
vOTU_00201	1	8088	8087	Low-quality	Genome-fragment	12.25	AAI-based (high-confidence)	0	None predicted	NONE	0	Singleton
vOTU_00203	1	4321	4320	Low-quality	Genome-fragment	5.03	AAI-based (high-confidence)	0	None predicted	YES	1815_0	Clustered
vOTU_00208	1	4203	4202	Low-quality	Genome-fragment	4.22	AAI-based (high-confidence)	0	None predicted	YES	0	Outlier
vOTU_00209	1	10227	10226	Low-quality	Genome-fragment	26.54	AAI-based (high-confidence)	0	Clostridium	YES	0	Outlier
vOTU_00210	1	4364	4363	Low-quality	Genome-fragment	8.73	AAI-based (high-confidence)	0	Ruminococcus	NONE	0	Outlier
vOTU_00211	1	9088	9087	Low-quality	Genome-fragment	23.99	AAI-based (high-confidence)	0	Roseburia	NONE	0	Outlier
vOTU_00212	1	4722	4721	Low-quality	Genome-fragment	16.66	HMM-based (lower-bound)	0	None predicted	NONE	0	Outlier
vOTU_00213	1	10521	10520	Low-quality	Genome-fragment	23.59	AAI-based (high-confidence)	0	None predicted	YES	1965_0	Clustered
vOTU_00214	1	9918	9917	Low-quality	Genome-fragment	21.97	AAI-based (high-confidence)	0	None predicted	YES	0	Outlier
vOTU_00216	1	7033	7032	Low-quality	Genome-fragment	14.16	AAI-based (high-confidence)	0	None predicted	YES	0	Singleton
vOTU_00217	1	5595	5594	Low-quality	Genome-fragment	12.41	AAI-based (high-confidence)	0	Criibacterium	NONE	0	Outlier
vOTU_00218	1	5543	5542	Not-determined	Genome-fragment	NA	NA	0	None predicted	YES	0	Singleton
vOTU_00219	1	5043	5042	Low-quality	Genome-fragment	5.8	AAI-based (high-confidence)	0	None predicted	YES	0	Outlier
vOTU_00220	1	4388	4387	Low-quality	Genome-fragment	7.93	AAI-based (high-confidence)	0	None predicted	NONE	0	Outlier
vOTU_00221	1	11608	11607	Low-quality	Genome-fragment	30.54	AAI-based (high-confidence)	0	Ruminococcus	NONE	1842_0	Clustered
vOTU_00222	1	9210	9209	Medium-quality	Genome-fragment	67.45	AAI-based (medium-confidence)	0	None predicted	YES	0	Outlier
vOTU_00223	1	4607	4606	Low-quality	Genome-fragment	2.94	AAI-based (high-confidence)	0	Coprococcus	YES	0	Outlier
vOTU_00224	1	4145	4144	Not-determined	Genome-fragment	NA	NA	0	None predicted	YES	0	Singleton
vOTU_00225	1	6293	6292	Low-quality	Genome-fragment	9.55	AAI-based (high-confidence)	0	Veillonella	YES	0	Outlier
vOTU_00226	1	5707	5706	Low-quality	Genome-fragment	8.66	AAI-based (high-confidence)	0	None predicted	YES	0	Singleton
vOTU_00227	1	4348	4347	Low-quality	Genome-fragment	10.68	AAI-based (high-confidence)	0	None predicted	YES	0	Outlier
vOTU_00228	1	4051	4050	Not-determined	Genome-fragment	NA	NA	0	None predicted	NONE	2289_0	Clustered
vOTU_00230	1	65033	65032	Complete	High-quality	100	DTR (high-confidence)	0	Streptococcus	NONE	2238_0	Clustered
vOTU_00232	1	6126	6125	Low-quality	Genome-fragment	15.24	AAI-based (high-confidence)	0	None predicted	YES	0	Singleton
vOTU_00233	1	5854	5853	Low-quality	Genome-fragment	12.82	AAI-based (high-confidence)	0	Odoribacter	YES	0	Outlier
vOTU_00234	1	5468	5467	Low-quality	Genome-fragment	2.52	AAI-based (high-confidence)	0	Bifidobacterium	NONE	2291_0	Clustered
vOTU_00235	1	4596	4595	Low-quality	Genome-fragment	10.17	AAI-based (high-confidence)	0	Bacteroides	NONE	0	Outlier
vOTU_00236	1	4265	4264	Low-quality	Genome-fragment	9.44	AAI-based (high-confidence)	0	Bacteroides	NONE	1789_0	Clustered
vOTU_00237	1	4024	4023	Low-quality	Genome-fragment	1.85	AAI-based (high-confidence)	0	None predicted	YES	2292_0	Clustered
vOTU_00238	1	48779	48778	Complete	High-quality	100	DTR (high-confidence)	0	Romboutsia	YES	2294_0	Clustered
vOTU_00239	1	9976	9975	Low-quality	Genome-fragment	17.67	HMM-based (lower-bound)	0	Streptococcus	YES	2296_0	Clustered
vOTU_00241	1	9677	9676	Not-determined	Genome-fragment	NA	NA	0	None predicted	NONE	2258_0	Clustered
vOTU_00242	1	4869	4868	Not-determined	Genome-fragment	NA	NA	0	None predicted	NONE	0	Outlier
vOTU_00243	1	9432	9431	Low-quality	Genome-fragment	21.02	AAI-based (high-confidence)	0	Clostridium	NONE	1965_0	Clustered
vOTU_00244	1	6419	6418	Low-quality	Genome-fragment	14.72	AAI-based (high-confidence)	0	Roseburia	YES	2190_0	Clustered
vOTU_00245	1	5203	5202	Low-quality	Genome-fragment	11.53	AAI-based (high-confidence)	0	Roseburia	NONE	0	Outlier
vOTU_00246	1	7310	7309	Not-determined	Genome-fragment	NA	NA	0	None predicted	YES	2258_0	Clustered
vOTU_00247	1	4986	4985	Not-determined	Genome-fragment	NA	NA	0	None predicted	NONE	2299_0	Clustered
vOTU_00248	1	4104	4103	Low-quality	Genome-fragment	9.02	AAI-based (high-confidence)	0	Bacteroides	YES	1789_0	Clustered
vOTU_00249	1	7149	7148	Low-quality	Genome-fragment	1.52	HMM-based (lower-bound)	85.88	None predicted	YES	0	Singleton
vOTU_00250	1	6198	6197	Not-determined	Genome-fragment	NA	NA	0	None predicted	YES	0	Singleton
vOTU_00251	1	5852	5851	Low-quality	Genome-fragment	6.54	AAI-based (medium-confidence)	0	None predicted	NONE	0	Outlier
vOTU_00253	1	5006	5005	Low-quality	Genome-fragment	5.77	AAI-based (high-confidence)	0	None predicted	YES	0	Outlier
vOTU_00254	1	4739	4738	Not-determined	Genome-fragment	NA	NA	0	None predicted	YES	0	Singleton
vOTU_00257	1	5677	5676	Low-quality	Genome-fragment	11.42	AAI-based (high-confidence)	0	None predicted	NONE	0	Singleton
vOTU_00258	1	5260	5259	Low-quality	Genome-fragment	5.32	AAI-based (high-confidence)	0	Porphyromonas	YES	0	Outlier
vOTU_00260	1	17169	17168	High-quality	High-quality	92.09	AAI-based (medium-confidence)	0	Eubacterium	YES	1893_0	Clustered
vOTU_00261	1	12248	12247	High-quality	High-quality	100	AAI-based (medium-confidence)	0	Ruminococcus	NONE	1559_0	Clustered
vOTU_00262	1	8995	8994	Low-quality	Genome-fragment	19.23	AAI-based (high-confidence)	0	Pseudoruminoccoccus	YES	2303_0	Clustered
vOTU_00263	1	8504	8503	Low-quality	Genome-fragment	18.55	AAI-based (high-confidence)	0	None predicted	YES	2304_0	Clustered
vOTU_00265	1	5615	5614	Low-quality	Genome-fragment	12.66	AAI-based (high-confidence)	0	None predicted	YES	0	Outlier
vOTU_00267	1	9424	9423	Low-quality	Genome-fragment	8.69	AAI-based (high-confidence)	0	None predicted	NONE	0	Outlier
vOTU_00268	1	5371	5370	Low-quality	Genome-fragment	18.61	AAI-based (medium-confidence)	0	None predicted	NONE	0	Outlier
vOTU_00269	1	4877	4876	Not-determined	Genome-fragment	NA	NA	0	None predicted	YES	2258_0	Clustered
vOTU_00270	1	102684	102683	High-quality	High-quality	100	AAI-based (high-confidence)	0	None predicted	YES	946_1	Clustered
vOTU_00271	1	10958	10957	Not-determined	Genome-fragment	NA	NA	0	None predicted	YES	0	Singleton
vOTU_00272	1	10868	10867	Low-quality	Genome-fragment	11.99	AAI-based (medium-confidence)	0	None predicted	YES	0	Outlier
vOTU_00273	1	9764	9763	Low-quality	Genome-fragment	11.19	AAI-based (medium-confidence)	0	None predicted	YES	0	Outlier
vOTU_00274	1	9248	9247	Low-quality	Genome-fragment	10.58	AAI-based (medium-confidence)	0	None predicted	YES	0	Outlier
vOTU_00275	1	8421	8420	Low-quality	Genome-fragment	9.63	AAI-based (medium-confidence)	0	None predicted	NONE	0	Outlier
vOTU_00276	1	5506	5505	Low-quality	Genome-fragment	19.42	HMM-based (lower-bound)	0	None predicted	YES	2059_0	Clustered
vOTU_00277	1	5476	5475	Not-determined	Genome-fragment	NA	NA	0	None predicted	NONE	2270_0	Clustered
vOTU_00278	1	16960	16959	Medium-quality	Genome-fragment	85.54	AAI-based (medium-confidence)	0	Eubacterium	NONE	1893_0	Clustered
vOTU_00279	1	11178	11177	Low-quality	Genome-fragment	18.03	AAI-based (high-confidence)	0	None predicted	NONE	0	Outlier
vOTU_00283	1	5541	5540	Low-quality	Genome-fragment	8.98	AAI-based (high-confidence)	0	None predicted	NONE	0	Outlier
vOTU_00284	1	5400	5399	Low-quality	Genome-fragment	17.55	AAI-based (high-confidence)	0	None predicted	NONE	1155_0	Clustered
vOTU_00285	1	4699	4698	Low-quality	Genome-fragment	7.38	AAI-based (high-confidence)	0	None predicted	YES	2239_0	Clustered
vOTU_00287	1	4164	4163	Low-quality	Genome-fragment	3.84	AAI-based (high-confidence)	0	None predicted	NONE	0	Overlap (VC_1106/VC_1109)
vOTU_00289	1	16224	16223	Medium-quality	Genome-fragment	51.14	HMM-based (lower-bound)	0	None predicted	NONE	2184_0	Clustered
vOTU_00291	1	6015	6014	Low-quality	Genome-fragment	14.92	AAI-based (high-confidence)	0	None predicted	NONE	2132_0	Clustered
vOTU_00292	1	5780	5779	Low-quality	Genome-fragment	8.23	AAI-based (high-confidence)	42.86	None predicted	NONE	0	Outlier
vOTU_00293	1	4098	4097	Low-quality	Genome-fragment	8.62	AAI-based (medium-confidence)	0	None predicted	YES	0	Singleton
vOTU_00295	1	5919	5918	Low-quality	Genome-fragment	3.76	AAI-based (high-confidence)	0	None predicted	NONE	0	Singleton
vOTU_00296	1	4166	4165	Low-quality	Genome-fragment	1.88	AAI-based (medium-confidence)	0	None predicted	YES	0	Singleton
vOTU_00298	1	5209	5208	Low-quality	Genome-fragment	12.62	AAI-based (high-confidence)	0	None predicted	YES	2023_0	Clustered
vOTU_00300	1	4497	4496	Low-quality	Genome-fragment	10.9	AAI-based (high-confidence)	0	None predicted	YES	0	Singleton
vOTU_00301	1	4122	4121	Low-quality	Genome-fragment	12.75	AAI-based (high-confidence)	0	None predicted	NONE	0	Outlier
vOTU_00302	1	7432	7431	Low-quality	Genome-fragment	16.07	AAI-based (high-confidence)	0	Butyricimonas	NONE	1790_0	Clustered
vOTU_00303	1	6512	6511	Low-quality	Genome-fragment	14.43	AAI-based (high-confidence)	0	Bacteroides	NONE	0	Outlier
vOTU_00306	1	5157	5156	Not-determined	Genome-fragment	NA	NA	0	Streptococcus	NONE	0	Singleton
vOTU_00307	1	4835	4834	Low-quality	Genome-fragment	10.64	AAI-based (high-confidence)	0	Parabacteroides	YES	1028_0	Clustered
vOTU_00308	1	4526	4525	Low-quality	Genome-fragment	9.88	AAI-based (high-confidence)	0	Butyricimonas	NONE	1790_0	Clustered
vOTU_00310	1	11778	11777	Low-quality	Genome-fragment	11.24	AAI-based (medium-confidence)	0	None predicted	NONE	2277_0	Clustered
vOTU_00313	1	9127	9126	Low-quality	Genome-fragment	9.79	AAI-based (high-confidence)	0	None predicted	YES	0	Outlier
vOTU_00316	1	44638	44637	High-quality	High-quality	98.55	AAI-based (high-confidence)	0	Bacteroides	NONE	1026_0	Clustered
vOTU_00317	1	26696	26695	High-quality	High-quality	92.54	AAI-based (high-confidence)	0	None predicted	YES	1933_0	Clustered
vOTU_00318	1	6426	6425	Low-quality	Genome-fragment	15.87	AAI-based (high-confidence)	0	None predicted	YES	2132_0	Clustered
vOTU_00319	1	23799	23798	Low-quality	Genome-fragment	18.5	AAI-based (high-confidence)	14.89	Bacteroides	YES	2187_0	Clustered
vOTU_00321	1	11896	11895	Low-quality	Genome-fragment	10.86	AAI-based (high-confidence)	0	None predicted	NONE	1105_0	Clustered
vOTU_00323	1	4380	4379	Not-determined	Genome-fragment	NA	NA	0	None predicted	YES	0	Singleton
vOTU_00325	1	7554	7553	Not-determined	Genome-fragment	NA	NA	0	None predicted	NONE	0	Singleton
vOTU_00328	1	4802	4801	Low-quality	Genome-fragment	25.6	AAI-based (medium-confidence)	0	None predicted	NONE	2074_0	Clustered
vOTU_00332	1	6501	6500	Low-quality	Genome-fragment	6.02	AAI-based (high-confidence)	0	None predicted	YES	0	Overlap (VC_1106/VC_1109)
vOTU_00336	1	4262	4261	Low-quality	Genome-fragment	1.39	AAI-based (medium-confidence)	0	None predicted	YES	0	Outlier
vOTU_00337	1	7179	7178	Low-quality	Genome-fragment	15.91	AAI-based (high-confidence)	0	Bacteroides	NONE	0	Outlier
vOTU_00338	1	4150	4149	Low-quality	Genome-fragment	8.87	AAI-based (high-confidence)	0	Butyricimonas	YES	1790_0	Clustered
vOTU_00340	1	18367	18366	Low-quality	Genome-fragment	40.4	AAI-based (high-confidence)	0	Bacteroides	YES	1026_0	Clustered
vOTU_00341	1	12574	12573	Low-quality	Genome-fragment	12.38	AAI-based (high-confidence)	0	None predicted	NONE	1109_0	Clustered
vOTU_00342	1	5944	5943	Low-quality	Genome-fragment	4.46	AAI-based (high-confidence)	0	Clostridioides	NONE	0	Outlier
vOTU_00343	1	4477	4476	Low-quality	Genome-fragment	8.53	AAI-based (high-confidence)	0	Clostridioides	YES	0	Outlier
vOTU_00344	1	4329	4328	Not-determined	Genome-fragment	NA	NA	0	None predicted	YES	2315_0	Clustered
vOTU_00345	1	5804	5803	Low-quality	Genome-fragment	14.92	AAI-based (high-confidence)	0	Ruminococcus	YES	0	Outlier
vOTU_00347	1	4996	4995	Low-quality	Genome-fragment	4.65	AAI-based (high-confidence)	0	None predicted	NONE	0	Outlier
vOTU_00348	1	4804	4803	Low-quality	Genome-fragment	12.44	AAI-based (high-confidence)	0	Ruminococcus	YES	1842_0	Clustered
vOTU_00351	1	11508	11507	Low-quality	Genome-fragment	10.99	AAI-based (medium-confidence)	0	None predicted	NONE	2277_0	Clustered
vOTU_00352	1	9514	9513	Low-quality	Genome-fragment	8.79	AAI-based (high-confidence)	0	None predicted	YES	0	Singleton
vOTU_00353	1	6469	6468	Low-quality	Genome-fragment	5.97	AAI-based (high-confidence)	0	None predicted	YES	0	Singleton
vOTU_00354	1	6308	6307	Low-quality	Genome-fragment	19.54	HMM-based (lower-bound)	0	Ruminococcus	NONE	1559_0	Clustered
vOTU_00355	1	5641	5640	Low-quality	Genome-fragment	5.19	AAI-based (high-confidence)	0	None predicted	YES	1106_0	Clustered
vOTU_00356	1	4738	4737	Low-quality	Genome-fragment	11.56	AAI-based (high-confidence)	0	None predicted	NONE	2024_0	Clustered
vOTU_00357	1	4278	4277	Low-quality	Genome-fragment	4.41	AAI-based (high-confidence)	0	Porphyromonas	YES	0	Singleton
vOTU_00358	1	16844	16843	Low-quality	Genome-fragment	18.41	AAI-based (high-confidence)	0	None predicted	NONE	899_0	Clustered
vOTU_00359	1	14259	14258	Low-quality	Genome-fragment	15.59	AAI-based (medium-confidence)	0	None predicted	NONE	0	Singleton
vOTU_00360	1	6165	6164	Not-determined	Genome-fragment	NA	NA	0	None predicted	NONE	0	Singleton
vOTU_00361	1	7950	7949	Low-quality	Genome-fragment	18.45	AAI-based (high-confidence)	0	None predicted	NONE	2234_0	Clustered
vOTU_00362	1	6327	6326	Low-quality	Genome-fragment	14.67	AAI-based (high-confidence)	0	None predicted	YES	0	Outlier
vOTU_00363	1	100776	100775	Complete	High-quality	100	DTR (high-confidence)	0	None predicted	NONE	946_5	Clustered
vOTU_00366	1	4175	4174	Low-quality	Genome-fragment	1.47	AAI-based (medium-confidence)	0	None predicted	YES	0	Singleton
vOTU_00369	1	5009	5008	Low-quality	Genome-fragment	4.97	AAI-based (high-confidence)	0	None predicted	NONE	0	Outlier
vOTU_00370	1	7121	7120	Low-quality	Genome-fragment	22.22	AAI-based (high-confidence)	0	None predicted	YES	1773_0	Clustered
vOTU_00371	1	5438	5437	Low-quality	Genome-fragment	24.01	AAI-based (medium-confidence)	0	None predicted	YES	0	Outlier
vOTU_00372	1	5363	5362	Low-quality	Genome-fragment	18.92	HMM-based (lower-bound)	0	None predicted	YES	2074_0	Clustered
vOTU_00375	1	5258	5257	Low-quality	Genome-fragment	11.86	AAI-based (high-confidence)	0	None predicted	NONE	2175_0	Clustered
vOTU_00376	1	8364	8363	Low-quality	Genome-fragment	9.22	AAI-based (medium-confidence)	0	None predicted	NONE	2282_0	Clustered
vOTU_00377	1	4784	4783	Low-quality	Genome-fragment	11.6	AAI-based (high-confidence)	0	None predicted	NONE	2024_0	Clustered
vOTU_00378	1	12150	12149	Low-quality	Genome-fragment	26.9	AAI-based (high-confidence)	0	Bacteroides	YES	0	Outlier
vOTU_00379	1	9956	9955	Low-quality	Genome-fragment	26.75	AAI-based (high-confidence)	0	None predicted	YES	2317_0	Clustered
vOTU_00380	1	9397	9396	Low-quality	Genome-fragment	20.76	AAI-based (high-confidence)	0	Bacteroides	YES	0	Outlier
vOTU_00381	1	6910	6909	Low-quality	Genome-fragment	15.07	AAI-based (high-confidence)	0	Bacteroides	YES	1789_0	Clustered
vOTU_00383	1	4718	4717	Low-quality	Genome-fragment	8.6	AAI-based (high-confidence)	0	Bacteroides	YES	1791_0	Clustered
vOTU_00384	1	4101	4100	Not-determined	Genome-fragment	NA	NA	0	None predicted	YES	2289_0	Clustered
vOTU_00387	1	5828	5827	Low-quality	Genome-fragment	8.48	AAI-based (high-confidence)	0	None predicted	NONE	0	Outlier
vOTU_00388	1	4365	4364	Low-quality	Genome-fragment	6.33	AAI-based (high-confidence)	0	Veillonella	NONE	0	Outlier
vOTU_00389	1	4025	4024	Low-quality	Genome-fragment	5.85	AAI-based (high-confidence)	0	None predicted	NONE	0	Outlier
vOTU_00390	1	6681	6680	Low-quality	Genome-fragment	18.03	AAI-based (medium-confidence)	0	None predicted	YES	2318_0	Clustered
vOTU_00391	1	6505	6504	Low-quality	Genome-fragment	19.24	HMM-based (lower-bound)	0	None predicted	YES	0	Outlier
vOTU_00392	1	5916	5915	Low-quality	Genome-fragment	2.72	AAI-based (high-confidence)	0	Bifidobacterium	NONE	0	Singleton
vOTU_00394	1	10325	10324	Low-quality	Genome-fragment	31.99	AAI-based (high-confidence)	0	Murdochiella	YES	0	Overlap (VC_1772/VC_1776/VC_1777/VC_2238)
vOTU_00396	1	4590	4589	Low-quality	Genome-fragment	4.24	AAI-based (high-confidence)	0	None predicted	YES	1104_0	Clustered
vOTU_00397	1	9773	9772	Low-quality	Genome-fragment	30.26	AAI-based (high-confidence)	0	Murdochiella	NONE	0	Overlap (VC_1772/VC_1776/VC_1777/VC_2238)
vOTU_00398	1	6057	6056	Low-quality	Genome-fragment	2.97	AAI-based (medium-confidence)	0	None predicted	YES	0	Outlier
vOTU_00399	1	5902	5901	Low-quality	Genome-fragment	19.17	AAI-based (high-confidence)	0	None predicted	NONE	0	Outlier
vOTU_00400	1	5761	5760	Not-determined	Genome-fragment	NA	NA	0	None predicted	YES	0	Singleton
vOTU_00402	1	6493	6492	Low-quality	Genome-fragment	7.49	AAI-based (high-confidence)	0	None predicted	NONE	1813_0	Clustered
vOTU_00404	1	4664	4663	Low-quality	Genome-fragment	4.57	AAI-based (high-confidence)	0	None predicted	YES	#N/A	#N/A
vOTU_00405	1	8275	8274	Not-determined	Genome-fragment	NA	NA	0	None predicted	YES	2258_0	Clustered
vOTU_00406	1	7725	7724	Low-quality	Genome-fragment	20.63	AAI-based (high-confidence)	0	Ruminococcus	YES	0	Outlier
vOTU_00408	1	4339	4338	Low-quality	Genome-fragment	1.78	AAI-based (high-confidence)	0	None predicted	YES	1979_0	Clustered
vOTU_00409	1	11210	11209	Low-quality	Genome-fragment	10.23	AAI-based (high-confidence)	0	None predicted	YES	1106_0	Clustered
vOTU_00410	1	9275	9274	Low-quality	Genome-fragment	9.33	AAI-based (high-confidence)	0	None predicted	NONE	#N/A	#N/A
vOTU_00412	1	8225	8224	Low-quality	Genome-fragment	7.45	AAI-based (high-confidence)	0	None predicted	YES	1103_0	Clustered
vOTU_00414	1	4134	4133	Low-quality	Genome-fragment	10.25	AAI-based (high-confidence)	0	None predicted	YES	0	Outlier
vOTU_00415	1	5988	5987	Low-quality	Genome-fragment	3.86	HMM-based (lower-bound)	0	None predicted	YES	0	Outlier
vOTU_00416	1	5105	5104	Low-quality	Genome-fragment	1.39	AAI-based (medium-confidence)	0	None predicted	YES	0	Outlier
vOTU_00417	1	4408	4407	Low-quality	Genome-fragment	3.06	AAI-based (medium-confidence)	0	None predicted	NONE	0	Singleton
vOTU_00418	1	4020	4019	Not-determined	Genome-fragment	NA	NA	0	None predicted	YES	0	Singleton
vOTU_00419	1	7133	7132	Low-quality	Genome-fragment	8.19	AAI-based (high-confidence)	0	None predicted	YES	0	Outlier
vOTU_00420	1	7812	7811	Low-quality	Genome-fragment	17.34	AAI-based (high-confidence)	0	Bacteroides	YES	0	Outlier
vOTU_00421	1	7716	7715	Low-quality	Genome-fragment	16.92	AAI-based (high-confidence)	0	Bacteroides	YES	0	Outlier
vOTU_00422	1	5942	5941	Low-quality	Genome-fragment	6.38	AAI-based (high-confidence)	0	None predicted	NONE	#N/A	#N/A
vOTU_00423	1	5143	5142	Low-quality	Genome-fragment	11.35	AAI-based (high-confidence)	0	Bacteroides	YES	1028_0	Clustered
vOTU_00424	1	4451	4450	Low-quality	Genome-fragment	9.79	AAI-based (high-confidence)	0	Butyricimonas	NONE	0	Outlier
vOTU_00425	1	4048	4047	Low-quality	Genome-fragment	4.34	AAI-based (high-confidence)	0	None predicted	YES	#N/A	#N/A
vOTU_00426	1	5890	5889	Complete	High-quality	100	DTR (high-confidence)	0	Bacteroides	NONE	1599_0	Clustered
vOTU_00428	1	4244	4243	Low-quality	Genome-fragment	6.32	AAI-based (high-confidence)	0	None predicted	NONE	2278_0	Clustered
vOTU_00429	1	4092	4091	Low-quality	Genome-fragment	6.11	AAI-based (high-confidence)	0	None predicted	NONE	0	Singleton
vOTU_00430	1	79891	79890	Medium-quality	Genome-fragment	78.79	AAI-based (high-confidence)	0	None predicted	YES	946_2	Clustered
vOTU_00431	1	10206	10205	Low-quality	Genome-fragment	10.05	AAI-based (high-confidence)	0	None predicted	YES	1109_0	Clustered
vOTU_00432	1	9852	9851	Low-quality	Genome-fragment	8.56	AAI-based (high-confidence)	0	None predicted	NONE	2226_0	Clustered
vOTU_00433	1	5185	5184	Low-quality	Genome-fragment	5.94	AAI-based (high-confidence)	0	None predicted	YES	821_0	Clustered
vOTU_00435	1	8555	8554	Low-quality	Genome-fragment	9.39	AAI-based (high-confidence)	0	None predicted	YES	1113_0	Clustered
vOTU_00438	1	4020	4019	Low-quality	Genome-fragment	8.84	AAI-based (high-confidence)	0	Parabacteroides	NONE	1028_0	Clustered
vOTU_00441	1	14295	14294	Low-quality	Genome-fragment	13.25	AAI-based (high-confidence)	0	Bacteroides	YES	1266_0	Clustered
vOTU_00442	1	7238	7237	Not-determined	Genome-fragment	NA	NA	0	None predicted	NONE	2277_0	Clustered
vOTU_00444	1	6164	6163	Low-quality	Genome-fragment	6.62	AAI-based (high-confidence)	0	None predicted	NONE	#N/A	#N/A
vOTU_00448	1	7846	7845	Low-quality	Genome-fragment	3.61	AAI-based (high-confidence)	0	None predicted	NONE	2291_0	Clustered
vOTU_00449	1	5812	5811	Low-quality	Genome-fragment	6.61	AAI-based (high-confidence)	0	None predicted	NONE	0	Singleton
vOTU_00450	1	13555	13554	Low-quality	Genome-fragment	12.44	AAI-based (high-confidence)	0	None predicted	NONE	0	Singleton
vOTU_00451	1	7569	7568	Low-quality	Genome-fragment	3.48	HMM-based (lower-bound)	0	None predicted	NONE	0	Singleton
vOTU_00452	1	4935	4934	Not-determined	Genome-fragment	NA	NA	0	None predicted	NONE	0	Singleton
vOTU_00453	1	4509	4508	Low-quality	Genome-fragment	16.41	HMM-based (lower-bound)	0	Lachnoclostridium	NONE	2192_0	Clustered
vOTU_00455	1	5303	5302	Low-quality	Genome-fragment	7.35	AAI-based (high-confidence)	0	None predicted	NONE	0	Outlier
vOTU_00456	1	98553	98552	High-quality	High-quality	99.6	AAI-based (high-confidence)	0	None predicted	NONE	946_1	Clustered
vOTU_00457	1	8593	8592	Not-determined	Genome-fragment	NA	NA	0	None predicted	YES	2258_0	Clustered
vOTU_00459	1	5359	5358	Not-determined	Genome-fragment	NA	NA	0	None predicted	YES	2258_0	Clustered
vOTU_00460	1	4278	4277	Not-determined	Genome-fragment	NA	NA	0	None predicted	NONE	2258_0	Clustered
vOTU_00461	1	13503	13502	Low-quality	Genome-fragment	14.12	AAI-based (high-confidence)	0	None predicted	NONE	0	Outlier
vOTU_00462	1	6054	6053	Not-determined	Genome-fragment	NA	NA	0	None predicted	NONE	0	Singleton
vOTU_00464	1	4744	4743	Low-quality	Genome-fragment	10.98	AAI-based (high-confidence)	0	Coprococcus	NONE	2190_0	Clustered
vOTU_00465	1	8738	8737	Low-quality	Genome-fragment	22.63	AAI-based (high-confidence)	0	Coprococcus	NONE	0	Outlier
vOTU_00466	1	8881	8880	Not-determined	Genome-fragment	NA	NA	0	None predicted	YES	2258_0	Clustered
vOTU_00467	1	7404	7403	Low-quality	Genome-fragment	21.82	AAI-based (high-confidence)	0	None predicted	YES	1775_0	Clustered
vOTU_00469	1	17707	17706	Low-quality	Genome-fragment	16.17	AAI-based (high-confidence)	0	Bacteroides	YES	2187_0	Clustered
vOTU_00470	1	6153	6152	Low-quality	Genome-fragment	16.7	AAI-based (medium-confidence)	0	None predicted	YES	2318_0	Clustered
vOTU_00472	1	11422	11421	Low-quality	Genome-fragment	39.59	AAI-based (high-confidence)	0	None predicted	YES	0	Outlier
vOTU_00473	1	9990	9989	Low-quality	Genome-fragment	34.63	AAI-based (high-confidence)	0	None predicted	YES	0	Outlier
vOTU_00474	1	9579	9578	Low-quality	Genome-fragment	33.2	AAI-based (high-confidence)	0	None predicted	YES	2014_0	Clustered
vOTU_00475	1	8123	8122	Low-quality	Genome-fragment	17.95	AAI-based (high-confidence)	0	Bacteroides	NONE	1028_0	Clustered
vOTU_00476	1	7464	7463	Low-quality	Genome-fragment	25.87	AAI-based (high-confidence)	0	None predicted	YES	2014_0	Clustered
vOTU_00477	1	6893	6892	Low-quality	Genome-fragment	15.26	AAI-based (high-confidence)	0	Odoribacter	NONE	0	Outlier
vOTU_00478	1	6868	6867	Not-determined	Genome-fragment	NA	NA	0	None predicted	YES	0	Outlier
vOTU_00479	1	5974	5973	Low-quality	Genome-fragment	13.19	AAI-based (high-confidence)	0	Bacteroides	YES	0	Outlier
vOTU_00480	1	4950	4949	Low-quality	Genome-fragment	11.04	AAI-based (high-confidence)	0	Odoribacter	NONE	1791_0	Clustered
vOTU_00482	1	21725	21724	Medium-quality	Genome-fragment	56.39	AAI-based (high-confidence)	0	Clostridiales	YES	1839_0	Clustered
vOTU_00483	1	4020	4019	Low-quality	Genome-fragment	10.42	AAI-based (high-confidence)	0	Roseburia	YES	0	Outlier
vOTU_00484	1	16829	16828	Medium-quality	Genome-fragment	58.33	AAI-based (high-confidence)	0	None predicted	YES	0	Outlier
vOTU_00488	1	6596	6595	Low-quality	Genome-fragment	21.58	AAI-based (medium-confidence)	0	None predicted	YES	2014_0	Clustered
vOTU_00490	1	17542	17541	Low-quality	Genome-fragment	18.38	AAI-based (high-confidence)	0	None predicted	YES	0	Outlier
vOTU_00491	1	11875	11874	Low-quality	Genome-fragment	12.44	AAI-based (high-confidence)	0	Bacteroides	YES	0	Outlier
vOTU_00492	1	10345	10344	Low-quality	Genome-fragment	10.83	AAI-based (high-confidence)	0	None predicted	NONE	0	Outlier
vOTU_00493	1	5956	5955	Low-quality	Genome-fragment	6.23	AAI-based (high-confidence)	0	None predicted	NONE	1116_0	Clustered
vOTU_00494	1	5497	5496	Low-quality	Genome-fragment	5.76	AAI-based (high-confidence)	0	None predicted	YES	1115_0	Clustered
vOTU_00496	1	4448	4447	Not-determined	Genome-fragment	NA	NA	0	None predicted	YES	2324_0	Clustered
vOTU_00497	1	27179	27178	Low-quality	Genome-fragment	25.18	AAI-based (high-confidence)	0	Bacteroides	YES	0	Outlier
vOTU_00499	1	4922	4921	Not-determined	Genome-fragment	NA	NA	0	None predicted	YES	2325_0	Clustered
vOTU_00501	1	4395	4394	Low-quality	Genome-fragment	12.3	AAI-based (high-confidence)	19.25	Bacteroides	YES	0	Outlier
vOTU_00503	1	12946	12945	Low-quality	Genome-fragment	11.85	AAI-based (high-confidence)	0	Bacteroides	NONE	1107_0	Clustered
vOTU_00510	1	22074	22073	Medium-quality	Genome-fragment	76.51	AAI-based (high-confidence)	0	Bacteroides	NONE	1933_0	Clustered
vOTU_00511	1	5499	5498	Low-quality	Genome-fragment	15.03	AAI-based (high-confidence)	0	None predicted	YES	0	Outlier
vOTU_00513	1	5294	5293	Low-quality	Genome-fragment	15.66	HMM-based (lower-bound)	0	Lachnoclostridium	NONE	0	Outlier
vOTU_00515	1	4059	4058	Not-determined	Genome-fragment	NA	NA	0	None predicted	NONE	2324_0	Clustered
vOTU_00516	1	9564	9563	Low-quality	Genome-fragment	20.98	AAI-based (high-confidence)	0	Butyricimonas	YES	1790_0	Clustered
vOTU_00517	1	4546	4545	Low-quality	Genome-fragment	5.91	AAI-based (high-confidence)	40.44	Bacteroides	NONE	0	Outlier
vOTU_00518	1	4124	4123	Low-quality	Genome-fragment	9.1	AAI-based (high-confidence)	0	Parabacteroides	NONE	0	Outlier
vOTU_00519	1	9375	9374	Low-quality	Genome-fragment	6.46	HMM-based (lower-bound)	0	None predicted	YES	2282_0	Clustered
vOTU_00520	1	8643	8642	Low-quality	Genome-fragment	9.43	AAI-based (high-confidence)	0	None predicted	YES	0	Outlier
vOTU_00521	1	6716	6715	Low-quality	Genome-fragment	7.36	AAI-based (high-confidence)	0	None predicted	NONE	0	Outlier
vOTU_00522	1	5613	5612	Low-quality	Genome-fragment	6.12	AAI-based (high-confidence)	0	None predicted	NONE	0	Outlier
vOTU_00523	1	4441	4440	Low-quality	Genome-fragment	4.81	AAI-based (high-confidence)	0	None predicted	YES	0	Outlier
vOTU_00524	1	11043	11042	Not-determined	Genome-fragment	NA	NA	0	None predicted	YES	2263_0	Clustered
vOTU_00525	1	7407	7406	Low-quality	Genome-fragment	25.67	AAI-based (medium-confidence)	0	None predicted	NONE	2258_0	Clustered
vOTU_00527	1	5126	5125	Low-quality	Genome-fragment	14.15	AAI-based (high-confidence)	0	None predicted	YES	0	Outlier
vOTU_00528	1	4620	4619	Not-determined	Genome-fragment	NA	NA	0	None predicted	NONE	2258_0	Clustered
vOTU_00530	1	10636	10635	Low-quality	Genome-fragment	23.99	AAI-based (high-confidence)	0	Clostridium	NONE	2190_0	Clustered
vOTU_00531	1	7631	7630	Low-quality	Genome-fragment	17.35	AAI-based (high-confidence)	0	Coprococcus	NONE	2175_0	Clustered
vOTU_00534	1	40816	40815	High-quality	High-quality	99.53	AAI-based (high-confidence)	0	Sharpea	NONE	0	Overlap (VC_1482/VC_2116)
vOTU_00536	1	4002	4001	Low-quality	Genome-fragment	13.11	AAI-based (high-confidence)	0	Bifidobacterium	NONE	0	Outlier
vOTU_00538	1	6725	6724	Not-determined	Genome-fragment	NA	NA	0	None predicted	YES	0	Singleton
vOTU_00539	1	4829	4828	Low-quality	Genome-fragment	2.22	AAI-based (high-confidence)	0	Bifidobacterium	NONE	2162_0	Clustered
vOTU_00540	1	4188	4187	Low-quality	Genome-fragment	1.55	AAI-based (high-confidence)	19.66	None predicted	NONE	0	Outlier
vOTU_00541	1	6715	6714	Low-quality	Genome-fragment	15.17	HMM-based (lower-bound)	0	None predicted	NONE	0	Singleton
vOTU_00542	1	8379	8378	Low-quality	Genome-fragment	18.54	AAI-based (high-confidence)	0	Bacteroides	YES	0	Outlier
vOTU_00545	1	4146	4145	Low-quality	Genome-fragment	2.24	AAI-based (medium-confidence)	0	None predicted	NONE	2271_0	Clustered
vOTU_00547	1	5004	5003	Low-quality	Genome-fragment	2.81	HMM-based (lower-bound)	0	None predicted	YES	0	Singleton
vOTU_00548	1	4336	4335	Low-quality	Genome-fragment	11.76	AAI-based (high-confidence)	0	None predicted	NONE	0	Outlier
vOTU_00549	1	5324	5323	Low-quality	Genome-fragment	9.56	AAI-based (high-confidence)	30.72	None predicted	YES	0	Outlier
vOTU_00550	1	11188	11187	Low-quality	Genome-fragment	30.06	AAI-based (high-confidence)	0	None predicted	NONE	2317_0	Clustered
vOTU_00552	1	6692	6691	Not-determined	Genome-fragment	NA	NA	0	None predicted	NONE	0	Singleton
vOTU_00553	1	4755	4754	Low-quality	Genome-fragment	10.49	AAI-based (high-confidence)	0	None predicted	YES	0	Outlier
vOTU_00555	1	4108	4107	Low-quality	Genome-fragment	9.05	AAI-based (high-confidence)	0	None predicted	YES	2304_0	Clustered
vOTU_00556	1	10458	10457	Low-quality	Genome-fragment	23.11	AAI-based (high-confidence)	0	Bacteroides	NONE	0	Outlier
vOTU_00557	1	8509	8508	Low-quality	Genome-fragment	18.76	AAI-based (high-confidence)	0	Parabacteroides	YES	1028_0	Clustered
vOTU_00560	1	4162	4161	Low-quality	Genome-fragment	8.92	AAI-based (high-confidence)	0	None predicted	NONE	2328_0	Clustered
vOTU_00561	1	6046	6045	Not-determined	Genome-fragment	NA	NA	0	None predicted	YES	2289_0	Clustered
vOTU_00566	1	4597	4596	Low-quality	Genome-fragment	9.91	AAI-based (high-confidence)	0	Roseburia	NONE	2303_0	Clustered
vOTU_00567	1	19223	19222	Low-quality	Genome-fragment	26.15	HMM-based (lower-bound)	0	Streptococcus	YES	2296_0	Clustered
vOTU_00568	1	6710	6709	Low-quality	Genome-fragment	11.01	AAI-based (high-confidence)	0	Lactobacillus	YES	0	Outlier
vOTU_00569	1	4638	4637	Low-quality	Genome-fragment	9.92	HMM-based (lower-bound)	0	Streptococcus	YES	0	Outlier
vOTU_00570	1	8497	8496	Low-quality	Genome-fragment	7.14	AAI-based (high-confidence)	0	None predicted	YES	0	Outlier
vOTU_00571	1	7644	7643	Low-quality	Genome-fragment	17.24	AAI-based (high-confidence)	0	Roseburia	NONE	2190_0	Clustered
vOTU_00572	1	7339	7338	Low-quality	Genome-fragment	39.99	AAI-based (high-confidence)	0	None predicted	NONE	0	Outlier
vOTU_00574	1	12008	12007	Low-quality	Genome-fragment	12.05	AAI-based (high-confidence)	0	None predicted	NONE	0	Outlier
vOTU_00575	1	11503	11502	Low-quality	Genome-fragment	10.98	AAI-based (medium-confidence)	0	None predicted	YES	2277_0	Clustered
vOTU_00576	1	8904	8903	Low-quality	Genome-fragment	8.61	AAI-based (high-confidence)	0	None predicted	YES	0	Singleton
vOTU_00577	1	7001	7000	Low-quality	Genome-fragment	7.03	AAI-based (high-confidence)	0	None predicted	NONE	1109_0	Clustered
vOTU_00578	1	6083	6082	Low-quality	Genome-fragment	6.14	AAI-based (high-confidence)	0	None predicted	NONE	0	Outlier
vOTU_00579	1	5886	5885	Low-quality	Genome-fragment	5.96	AAI-based (high-confidence)	0	None predicted	YES	0	Outlier
vOTU_00580	1	5516	5515	Low-quality	Genome-fragment	5.45	AAI-based (high-confidence)	0	None predicted	YES	0	Outlier
vOTU_00581	1	5038	5037	Low-quality	Genome-fragment	5.09	AAI-based (high-confidence)	0	None predicted	NONE	1110_0	Clustered
vOTU_00583	1	13091	13090	Low-quality	Genome-fragment	37.61	AAI-based (high-confidence)	0	None predicted	NONE	0	Overlap (VC_1770/VC_1776)
vOTU_00585	1	5626	5625	Low-quality	Genome-fragment	5.61	AAI-based (high-confidence)	0	None predicted	YES	1107_0	Clustered
vOTU_00587	1	6608	6607	Low-quality	Genome-fragment	17.44	AAI-based (high-confidence)	0	Roseburia	YES	1842_0	Clustered
vOTU_00588	1	6564	6563	Not-determined	Genome-fragment	NA	NA	0	None predicted	YES	2288_0	Clustered
vOTU_00590	1	4261	4260	Low-quality	Genome-fragment	13.78	AAI-based (high-confidence)	0	None predicted	YES	0	Outlier
vOTU_00591	1	4219	4218	Low-quality	Genome-fragment	12.98	AAI-based (high-confidence)	0	None predicted	NONE	1771_0	Clustered/Singleton
vOTU_00594	1	5912	5911	Low-quality	Genome-fragment	18.39	AAI-based (high-confidence)	0	Eggerthella	YES	0	Outlier
vOTU_00595	1	4133	4132	Low-quality	Genome-fragment	12.87	AAI-based (high-confidence)	0	Gordonibacter	YES	0	Outlier
vOTU_00596	1	5610	5609	Low-quality	Genome-fragment	14.38	AAI-based (high-confidence)	0	Coprococcus	YES	1957_0	Clustered
vOTU_00597	1	5443	5442	Low-quality	Genome-fragment	19.2	HMM-based (lower-bound)	0	None predicted	YES	0	Outlier
vOTU_00598	1	4985	4984	Low-quality	Genome-fragment	12.87	AAI-based (high-confidence)	0	Blautia	NONE	0	Outlier
vOTU_00599	1	4212	4211	Low-quality	Genome-fragment	10.45	AAI-based (high-confidence)	0	None predicted	YES	0	Outlier
vOTU_00602	1	6135	6134	Not-determined	Genome-fragment	NA	NA	0	None predicted	NONE	2315_0	Clustered
vOTU_00605	1	15867	15866	Low-quality	Genome-fragment	34.42	AAI-based (high-confidence)	0	Blautia	NONE	1993_0	Clustered
vOTU_00606	1	6880	6879	Low-quality	Genome-fragment	14.82	AAI-based (high-confidence)	0	None predicted	NONE	2308_0	Clustered
vOTU_00607	1	5963	5962	Low-quality	Genome-fragment	13.02	AAI-based (high-confidence)	0	Clostridium	NONE	0	Outlier
vOTU_00608	1	4861	4860	Low-quality	Genome-fragment	11.02	AAI-based (high-confidence)	0	None predicted	NONE	0	Outlier
vOTU_00609	1	4012	4011	Low-quality	Genome-fragment	10.72	AAI-based (high-confidence)	0	None predicted	NONE	989_0	Clustered
vOTU_00611	1	10820	10819	Low-quality	Genome-fragment	9.91	AAI-based (high-confidence)	0	Bacteroides	YES	1107_0	Clustered
vOTU_00612	1	6759	6758	Low-quality	Genome-fragment	6.17	AAI-based (high-confidence)	0	None predicted	NONE	1106_0	Clustered
vOTU_00613	1	4546	4545	Low-quality	Genome-fragment	8.16	AAI-based (high-confidence)	0	None predicted	YES	0	Singleton
vOTU_00614	1	4200	4199	Low-quality	Genome-fragment	14.56	AAI-based (medium-confidence)	0	None predicted	NONE	0	Outlier
vOTU_00615	1	9711	9710	Low-quality	Genome-fragment	9.28	AAI-based (medium-confidence)	0	None predicted	YES	2277_0	Clustered
vOTU_00617	1	7780	7779	Not-determined	Genome-fragment	NA	NA	0	None predicted	YES	2264_0	Clustered
vOTU_00618	1	6593	6592	Low-quality	Genome-fragment	18.92	AAI-based (high-confidence)	0	None predicted	YES	0	Outlier
vOTU_00620	1	21868	21867	Medium-quality	Genome-fragment	75.8	AAI-based (high-confidence)	0	None predicted	YES	1933_0	Clustered
vOTU_00622	1	4480	4479	Low-quality	Genome-fragment	5.21	AAI-based (high-confidence)	0	None predicted	YES	0	Outlier
vOTU_00624	1	11947	11946	Complete	High-quality	100	ITR (high-confidence)	0	None predicted	YES	1560_0	Clustered
vOTU_00626	1	8689	8688	Low-quality	Genome-fragment	8.04	AAI-based (high-confidence)	0	None predicted	NONE	1106_0	Clustered
vOTU_00627	1	8485	8484	Low-quality	Genome-fragment	29.41	AAI-based (high-confidence)	0	None predicted	NONE	2014_0	Clustered
vOTU_00635	1	9510	9509	Not-determined	Genome-fragment	NA	NA	0	None predicted	YES	2258_0	Clustered
vOTU_00636	1	15458	15457	Low-quality	Genome-fragment	34.44	AAI-based (high-confidence)	0	Clostridium	NONE	0	Overlap (VC_982/VC_1966)
vOTU_00637	1	5800	5799	Low-quality	Genome-fragment	13.28	AAI-based (high-confidence)	0	Roseburia	YES	2190_0	Clustered
vOTU_00640	1	32949	32948	Low-quality	Genome-fragment	34.53	AAI-based (high-confidence)	0	None predicted	NONE	0	Outlier
vOTU_00641	1	10822	10821	Low-quality	Genome-fragment	11.36	AAI-based (high-confidence)	0	None predicted	NONE	0	Outlier
vOTU_00642	1	8805	8804	Low-quality	Genome-fragment	9.23	AAI-based (high-confidence)	0	None predicted	YES	1115_0	Clustered
vOTU_00643	1	8289	8288	Low-quality	Genome-fragment	13.54	AAI-based (high-confidence)	0	None predicted	YES	2240_0	Clustered
vOTU_00647	1	4500	4499	Low-quality	Genome-fragment	7.25	AAI-based (high-confidence)	0	None predicted	YES	0	Outlier
vOTU_00648	1	4445	4444	Low-quality	Genome-fragment	12.3	AAI-based (high-confidence)	0	None predicted	NONE	989_0	Clustered
vOTU_00649	1	4343	4342	Low-quality	Genome-fragment	7.06	AAI-based (high-confidence)	0	None predicted	NONE	0	Outlier
vOTU_00650	1	11769	11768	Low-quality	Genome-fragment	18.4	AAI-based (high-confidence)	0	None predicted	YES	2239_0	Clustered
vOTU_00651	1	11643	11642	Low-quality	Genome-fragment	26.97	AAI-based (high-confidence)	0	Coprococcus	YES	2190_0	Clustered
vOTU_00652	1	6648	6647	Low-quality	Genome-fragment	11.92	HMM-based (lower-bound)	0	None predicted	NONE	0	Outlier
vOTU_00653	1	5450	5449	Low-quality	Genome-fragment	8.75	AAI-based (high-confidence)	0	None predicted	YES	0	Outlier
vOTU_00654	1	4759	4758	Not-determined	Genome-fragment	NA	NA	0	None predicted	YES	0	Singleton
vOTU_00658	1	4651	4650	Not-determined	Genome-fragment	NA	NA	0	None predicted	YES	0	Singleton
vOTU_00659	1	7954	7953	Low-quality	Genome-fragment	25.81	AAI-based (high-confidence)	0	None predicted	YES	0	Outlier
vOTU_00661	1	11059	11058	Low-quality	Genome-fragment	10.1	AAI-based (high-confidence)	0	Bacteroides	NONE	2187_0	Clustered
vOTU_00662	1	6120	6119	Low-quality	Genome-fragment	17.59	AAI-based (high-confidence)	0	None predicted	YES	1775_0	Clustered
vOTU_00663	1	5300	5299	Low-quality	Genome-fragment	4.92	AAI-based (high-confidence)	0	Bacteroides	YES	0	Outlier
vOTU_00665	1	4183	4182	Low-quality	Genome-fragment	13.59	AAI-based (high-confidence)	0	None predicted	YES	0	Singleton
vOTU_00666	1	6394	6393	Low-quality	Genome-fragment	9.16	AAI-based (high-confidence)	0	None predicted	NONE	0	Outlier
vOTU_00668	1	4907	4906	Low-quality	Genome-fragment	6.98	AAI-based (high-confidence)	0	None predicted	NONE	0	Outlier
vOTU_00669	1	4490	4489	Low-quality	Genome-fragment	4.07	AAI-based (high-confidence)	0	None predicted	NONE	0	Singleton
vOTU_00671	1	4081	4080	Low-quality	Genome-fragment	4.14	AAI-based (high-confidence)	0	None predicted	YES	2329_0	Clustered
vOTU_00672	1	10832	10831	Low-quality	Genome-fragment	26.29	AAI-based (high-confidence)	0	None predicted	YES	2023_0	Clustered
vOTU_00673	1	5506	5505	Low-quality	Genome-fragment	13.33	AAI-based (high-confidence)	0	None predicted	YES	2021_0	Clustered
vOTU_00674	1	7302	7301	Low-quality	Genome-fragment	18.04	AAI-based (high-confidence)	0	None predicted	NONE	2132_0	Clustered
vOTU_00675	1	4755	4754	Low-quality	Genome-fragment	11.8	AAI-based (high-confidence)	0	None predicted	YES	0	Outlier
vOTU_00676	1	4356	4355	Low-quality	Genome-fragment	1.71	AAI-based (high-confidence)	0	None predicted	YES	0	Singleton
vOTU_00677	1	4136	4135	Low-quality	Genome-fragment	1.59	AAI-based (high-confidence)	0	None predicted	YES	0	Singleton
vOTU_00678	1	21172	21171	Low-quality	Genome-fragment	47.12	AAI-based (high-confidence)	0	Clostridium	YES	0	Overlap (VC_982/VC_1966)
vOTU_00679	1	5415	5414	Low-quality	Genome-fragment	19.1	HMM-based (lower-bound)	0	Lachnoclostridium	YES	2192_0	Clustered
vOTU_00680	1	7182	7181	Not-determined	Genome-fragment	NA	NA	0	None predicted	YES	2264_0	Clustered
vOTU_00681	1	10154	10153	Medium-quality	Genome-fragment	86.27	AAI-based (medium-confidence)	0	Prevotella	YES	1560_0	Clustered
vOTU_00682	1	9061	9060	Not-determined	Genome-fragment	NA	NA	0	None predicted	NONE	0	Singleton
vOTU_00683	1	6666	6665	Not-determined	Genome-fragment	NA	NA	0	None predicted	NONE	0	Singleton
vOTU_00685	1	4660	4659	Not-determined	Genome-fragment	NA	NA	0	None predicted	NONE	0	Singleton
vOTU_00686	1	7510	7509	Not-determined	Genome-fragment	NA	NA	0	None predicted	YES	0	Outlier
vOTU_00690	1	4312	4311	Low-quality	Genome-fragment	11.16	AAI-based (high-confidence)	0	Ruminococcus	YES	0	Outlier
vOTU_00691	1	5624	5623	Low-quality	Genome-fragment	14.07	AAI-based (high-confidence)	0	None predicted	YES	2132_0	Clustered
vOTU_00692	1	5599	5598	Not-determined	Genome-fragment	NA	NA	0	None predicted	YES	0	Singleton
vOTU_00694	1	44955	44954	Complete	High-quality	100	DTR (high-confidence)	0	Bacteroides	YES	1026_0	Clustered
vOTU_00697	1	6520	6519	Low-quality	Genome-fragment	5.92	AAI-based (high-confidence)	0	None predicted	YES	0	Overlap (VC_1106/VC_1107/VC_1109)
vOTU_00698	1	6219	6218	Low-quality	Genome-fragment	6.04	AAI-based (high-confidence)	0	None predicted	YES	0	Outlier
vOTU_00701	1	56292	56291	Low-quality	Genome-fragment	30.76	AAI-based (high-confidence)	0	Bacteroides	YES	1118_2	Clustered
vOTU_00702	1	7920	7919	Low-quality	Genome-fragment	4.26	AAI-based (high-confidence)	0	None predicted	NONE	0	Outlier
vOTU_00703	1	4319	4318	Low-quality	Genome-fragment	8.57	AAI-based (high-confidence)	0	None predicted	NONE	0	Outlier
vOTU_00705	1	5569	5568	Low-quality	Genome-fragment	14.4	AAI-based (high-confidence)	0	Ruminococcus	YES	1842_0	Clustered
vOTU_00707	1	5000	4999	Low-quality	Genome-fragment	12.95	AAI-based (high-confidence)	0	Roseburia	YES	0	Outlier
vOTU_00710	1	16144	16143	Low-quality	Genome-fragment	35.8	AAI-based (high-confidence)	0	Bacteroides	YES	1028_0	Clustered
vOTU_00711	1	5887	5886	Low-quality	Genome-fragment	13.03	AAI-based (high-confidence)	0	Parabacteroides	YES	0	Outlier
vOTU_00712	1	23009	23008	Medium-quality	Genome-fragment	50.5	AAI-based (high-confidence)	0	Odoribacter	NONE	0	Outlier
vOTU_00713	1	9176	9175	Low-quality	Genome-fragment	20.22	AAI-based (high-confidence)	0	Bacteroides	YES	0	Outlier
vOTU_00714	1	9112	9111	Low-quality	Genome-fragment	20.22	AAI-based (high-confidence)	0	Bacteroides	YES	0	Outlier
vOTU_00716	1	4390	4389	Low-quality	Genome-fragment	9.67	AAI-based (high-confidence)	0	Bacteroides	YES	1028_0	Clustered
vOTU_00718	1	6357	6356	Low-quality	Genome-fragment	11.39	AAI-based (medium-confidence)	0	None predicted	YES	0	Singleton
vOTU_00719	1	12300	12299	High-quality	High-quality	100	AAI-based (medium-confidence)	0	Ruminococcus	YES	1559_0	Clustered
vOTU_00722	1	8752	8751	Low-quality	Genome-fragment	22.81	AAI-based (high-confidence)	0	Lachnospiraceae	NONE	1842_0	Clustered
vOTU_00724	1	11879	11878	High-quality	High-quality	100	AAI-based (medium-confidence)	0	Ruminococcus	NONE	0	Outlier
vOTU_00725	1	4380	4379	Not-determined	Genome-fragment	NA	NA	0	None predicted	YES	0	Singleton
vOTU_00729	1	17247	17246	Low-quality	Genome-fragment	17.1	AAI-based (high-confidence)	0	Porphyromonas	NONE	#N/A	#N/A
vOTU_00731	1	5395	5394	Low-quality	Genome-fragment	4.98	AAI-based (high-confidence)	0	None predicted	NONE	0	Outlier
vOTU_00733	1	9631	9630	Low-quality	Genome-fragment	8.79	AAI-based (high-confidence)	0	Bacteroides	NONE	2187_0	Clustered
vOTU_00734	1	6481	6480	Low-quality	Genome-fragment	19.16	AAI-based (medium-confidence)	0	None predicted	YES	1775_0	Clustered
vOTU_00735	1	4382	4381	Low-quality	Genome-fragment	2.41	AAI-based (high-confidence)	0	None predicted	YES	2271_0	Clustered
vOTU_00736	1	4269	4268	Low-quality	Genome-fragment	3.9	AAI-based (high-confidence)	0	Bacteroides	YES	0	Outlier
vOTU_00738	1	4736	4735	Low-quality	Genome-fragment	12.25	AAI-based (high-confidence)	0	Lachnospira	NONE	1842_0	Clustered
vOTU_00743	1	8053	8052	Low-quality	Genome-fragment	5.09	AAI-based (high-confidence)	0	None predicted	YES	2257_0	Clustered
vOTU_00744	1	4857	4856	Low-quality	Genome-fragment	21.43	AAI-based (medium-confidence)	0	None predicted	NONE	0	Outlier
vOTU_00746	1	13393	13392	Medium-quality	Genome-fragment	58.88	AAI-based (medium-confidence)	0	None predicted	YES	2058_0	Clustered
vOTU_00747	1	40373	40372	Medium-quality	Genome-fragment	65.13	AAI-based (high-confidence)	0	Blautia	NONE	996_0	Clustered
vOTU_00755	1	11745	11744	Low-quality	Genome-fragment	12.31	AAI-based (high-confidence)	0	None predicted	YES	0	Outlier
vOTU_00756	1	11744	11743	Low-quality	Genome-fragment	12.34	AAI-based (high-confidence)	0	None predicted	YES	1116_0	Clustered
vOTU_00757	1	7173	7172	Low-quality	Genome-fragment	7.53	AAI-based (high-confidence)	0	None predicted	YES	0	Outlier
vOTU_00759	1	6777	6776	Not-determined	Genome-fragment	NA	NA	0	None predicted	NONE	2332_0	Clustered
vOTU_00760	1	6187	6186	Low-quality	Genome-fragment	6.49	AAI-based (high-confidence)	0	None predicted	YES	0	Outlier
vOTU_00761	1	5297	5296	Low-quality	Genome-fragment	5.55	AAI-based (high-confidence)	0	None predicted	NONE	0	Singleton
vOTU_00762	1	4891	4890	Low-quality	Genome-fragment	5.13	AAI-based (high-confidence)	0	None predicted	NONE	1115_0	Clustered
vOTU_00763	1	4440	4439	Low-quality	Genome-fragment	10.76	AAI-based (high-confidence)	0	None predicted	YES	0	Outlier
vOTU_00768	1	5087	5086	Low-quality	Genome-fragment	10.91	AAI-based (high-confidence)	0	None predicted	YES	2328_0	Clustered
vOTU_00781	1	4908	4907	Low-quality	Genome-fragment	11.89	AAI-based (high-confidence)	0	None predicted	YES	2023_0	Clustered
vOTU_00782	1	21569	21568	Medium-quality	Genome-fragment	56.04	AAI-based (high-confidence)	0	Roseburia	NONE	0	Outlier
vOTU_00783	1	15220	15219	Low-quality	Genome-fragment	13.94	AAI-based (high-confidence)	0	None predicted	YES	1106_0	Clustered
vOTU_00784	1	4531	4530	Low-quality	Genome-fragment	4.13	AAI-based (high-confidence)	0	None predicted	NONE	#N/A	#N/A
vOTU_00787	1	5032	5031	Low-quality	Genome-fragment	10.79	AAI-based (high-confidence)	0	None predicted	NONE	0	Outlier
vOTU_00788	1	10777	10776	Low-quality	Genome-fragment	17.38	AAI-based (high-confidence)	0	None predicted	YES	0	Outlier
vOTU_00789	1	4865	4864	Low-quality	Genome-fragment	16.26	AAI-based (medium-confidence)	0	None predicted	YES	0	Singleton
vOTU_00790	1	32796	32795	Low-quality	Genome-fragment	34.14	AAI-based (high-confidence)	0	None predicted	YES	0	Outlier
vOTU_00791	1	20168	20167	Low-quality	Genome-fragment	21.03	AAI-based (high-confidence)	0	None predicted	NONE	0	Outlier
vOTU_00792	1	11493	11492	Low-quality	Genome-fragment	12.03	AAI-based (high-confidence)	0	None predicted	NONE	0	Outlier
vOTU_00793	1	7492	7491	Low-quality	Genome-fragment	7.86	AAI-based (high-confidence)	0	None predicted	NONE	0	Singleton
vOTU_00794	1	7430	7429	Low-quality	Genome-fragment	7.8	AAI-based (high-confidence)	0	None predicted	YES	0	Outlier
vOTU_00795	1	4729	4728	Not-determined	Genome-fragment	NA	NA	0	None predicted	YES	2258_0	Clustered
vOTU_00797	1	4304	4303	Low-quality	Genome-fragment	4.52	AAI-based (high-confidence)	0	None predicted	NONE	0	Outlier
vOTU_00798	1	4125	4124	Low-quality	Genome-fragment	4.3	AAI-based (high-confidence)	0	Prevotella	NONE	0	Outlier
vOTU_00799	1	15213	15212	Low-quality	Genome-fragment	37.73	AAI-based (high-confidence)	0	Kandleria	NONE	0	Overlap (VC_1482/VC_2116)
vOTU_00802	1	6096	6095	Low-quality	Genome-fragment	13.02	AAI-based (high-confidence)	0	Blautia	YES	1956_0	Clustered
vOTU_00803	1	5023	5022	Not-determined	Genome-fragment	NA	NA	0	None predicted	NONE	2299_0	Clustered
vOTU_00804	1	6864	6863	Not-determined	Genome-fragment	NA	NA	0	None predicted	YES	0	Singleton
vOTU_00807	1	4543	4542	Low-quality	Genome-fragment	2.49	AAI-based (medium-confidence)	0	None predicted	NONE	0	Outlier
vOTU_00808	1	32395	32394	Low-quality	Genome-fragment	21.76	HMM-based (lower-bound)	0	Tyzzerella	YES	0	Singleton
vOTU_00809	1	4486	4485	Low-quality	Genome-fragment	13.01	AAI-based (high-confidence)	0	None predicted	YES	1775_0	Clustered
vOTU_00810	1	11476	11475	Not-determined	Genome-fragment	NA	NA	0	None predicted	YES	2245_0	Clustered
vOTU_00811	1	7635	7634	Low-quality	Genome-fragment	19.79	AAI-based (high-confidence)	0	Ruminococcus	NONE	0	Outlier
vOTU_00812	1	11513	11512	Not-determined	Genome-fragment	NA	NA	0	None predicted	YES	0	Outlier
vOTU_00813	1	8313	8312	Not-determined	Genome-fragment	NA	NA	0	None predicted	NONE	0	Outlier
vOTU_00817	1	11895	11894	Low-quality	Genome-fragment	17.73	AAI-based (high-confidence)	0	Prevotella	YES	0	Outlier
vOTU_00818	1	9509	9508	Low-quality	Genome-fragment	14.19	AAI-based (high-confidence)	0	None predicted	NONE	0	Singleton
vOTU_00819	1	6128	6127	Not-determined	Genome-fragment	NA	NA	0	None predicted	YES	0	Singleton
vOTU_00820	1	87492	87491	Complete	High-quality	100	DTR (high-confidence)	0	None predicted	NONE	820_0	Clustered
vOTU_00822	1	5883	5882	Low-quality	Genome-fragment	5.18	AAI-based (high-confidence)	0	Eggerthella	NONE	0	Outlier
vOTU_00825	1	4759	4758	Low-quality	Genome-fragment	12.15	AAI-based (high-confidence)	0	Blautia	NONE	0	Outlier
vOTU_00826	1	13947	13946	Low-quality	Genome-fragment	8.65	AAI-based (medium-confidence)	0	None predicted	YES	0	Outlier
vOTU_00828	1	5015	5014	Low-quality	Genome-fragment	5.75	AAI-based (high-confidence)	0	None predicted	YES	821_0	Clustered
vOTU_00829	1	4414	4413	Low-quality	Genome-fragment	3.73	AAI-based (high-confidence)	0	None predicted	YES	0	Outlier
vOTU_00830	1	10472	10471	Low-quality	Genome-fragment	18.08	AAI-based (high-confidence)	0	Bacteroides	YES	0	Outlier
vOTU_00831	1	4351	4350	Not-determined	Genome-fragment	NA	NA	0	None predicted	NONE	0	Singleton
vOTU_00832	1	12093	12092	Low-quality	Genome-fragment	13.99	AAI-based (high-confidence)	0	None predicted	YES	0	Outlier
vOTU_00833	1	4534	4533	Low-quality	Genome-fragment	11.07	AAI-based (high-confidence)	0	None predicted	YES	2024_0	Clustered
vOTU_00835	1	13195	13194	Low-quality	Genome-fragment	35.3	AAI-based (high-confidence)	0	None predicted	YES	0	Outlier
vOTU_00837	1	9441	9440	Low-quality	Genome-fragment	24.63	AAI-based (high-confidence)	0	Lachnospiraceae	YES	1842_0	Clustered
vOTU_00839	1	101031	101030	Complete	High-quality	100	DTR (high-confidence)	0	None predicted	YES	946_2	Clustered
vOTU_00842	1	6194	6193	Low-quality	Genome-fragment	13.43	AAI-based (high-confidence)	0	Blautia	YES	0	Outlier
vOTU_00843	1	4852	4851	Low-quality	Genome-fragment	21.22	AAI-based (medium-confidence)	0	None predicted	NONE	0	Outlier
vOTU_00844	1	4031	4030	Low-quality	Genome-fragment	13.17	AAI-based (medium-confidence)	0	Bacteroides	YES	2014_0	Clustered
vOTU_00845	1	5410	5409	Low-quality	Genome-fragment	6.24	AAI-based (high-confidence)	0	None predicted	NONE	0	Outlier
vOTU_00846	1	41669	41668	Complete	High-quality	100	DTR (high-confidence)	0	Enterococcus	YES	901_0	Clustered
vOTU_00848	1	10258	10257	Low-quality	Genome-fragment	20.94	AAI-based (high-confidence)	0	None predicted	NONE	0	Outlier
vOTU_00849	1	8102	8101	Low-quality	Genome-fragment	16.6	AAI-based (high-confidence)	0	None predicted	YES	0	Overlap (VC_2295/VC_2296)
vOTU_00850	1	8038	8037	Not-determined	Genome-fragment	NA	NA	0	None predicted	YES	2264_0	Clustered
vOTU_00851	1	33029	33028	Low-quality	Genome-fragment	17.15	AAI-based (medium-confidence)	16.2	None predicted	NONE	0	Outlier
vOTU_00852	1	7532	7531	Low-quality	Genome-fragment	16	AAI-based (high-confidence)	0	Eubacterium	NONE	0	Singleton
vOTU_00853	1	5279	5278	Low-quality	Genome-fragment	2.35	AAI-based (high-confidence)	0	None predicted	YES	0	Singleton
vOTU_00854	1	5275	5274	Not-determined	Genome-fragment	NA	NA	0	None predicted	YES	0	Singleton
vOTU_00855	1	4551	4550	Low-quality	Genome-fragment	7.32	AAI-based (high-confidence)	0	None predicted	NONE	2240_0	Clustered
vOTU_00856	1	6731	6730	Not-determined	Genome-fragment	NA	NA	0	None predicted	YES	0	Singleton
vOTU_00858	1	7937	7936	Low-quality	Genome-fragment	22.72	AAI-based (high-confidence)	0	None predicted	NONE	1775_0	Clustered
vOTU_00859	1	5536	5535	Not-determined	Genome-fragment	NA	NA	0	None predicted	YES	2270_0	Clustered
vOTU_00860	1	8966	8965	Low-quality	Genome-fragment	9.17	AAI-based (medium-confidence)	0	None predicted	YES	0	Singleton
vOTU_00861	1	5696	5695	Low-quality	Genome-fragment	25.67	AAI-based (high-confidence)	0	None predicted	NONE	0	Outlier
vOTU_00862	1	5080	5079	Low-quality	Genome-fragment	13.41	AAI-based (high-confidence)	0	None predicted	YES	2281_0	Clustered
vOTU_00863	1	4100	4099	Low-quality	Genome-fragment	18.46	AAI-based (high-confidence)	0	None predicted	YES	1483_0	Clustered
vOTU_00864	1	6192	6191	Low-quality	Genome-fragment	13.74	AAI-based (high-confidence)	0	Clostridium	YES	0	Outlier
vOTU_00865	1	4917	4916	Low-quality	Genome-fragment	10.96	AAI-based (high-confidence)	0	Roseburia	YES	0	Outlier
vOTU_00866	1	26586	26585	Medium-quality	Genome-fragment	64.82	AAI-based (high-confidence)	0	Kandleria	NONE	0	Overlap (VC_1482/VC_2116)
vOTU_00867	1	10546	10545	Low-quality	Genome-fragment	26.99	AAI-based (high-confidence)	0	Sharpea	NONE	0	Outlier
vOTU_00868	1	6377	6376	Complete	High-quality	100	DTR (high-confidence)	0	Barnesiella	NONE	0	Outlier
vOTU_00869	1	41109	41108	High-quality	High-quality	90.89	AAI-based (high-confidence)	0	Bacteroides	YES	1026_0	Clustered
vOTU_00870	1	16460	16459	Low-quality	Genome-fragment	12.13	AAI-based (high-confidence)	0	None predicted	NONE	2331_0	Clustered
vOTU_00871	1	7267	7266	Low-quality	Genome-fragment	14.89	AAI-based (high-confidence)	0	None predicted	YES	0	Overlap (VC_2295/VC_2296)
vOTU_00873	1	4405	4404	Low-quality	Genome-fragment	9.74	AAI-based (high-confidence)	0	Odoribacter	NONE	0	Outlier
vOTU_00875	1	7992	7991	Low-quality	Genome-fragment	24.62	AAI-based (high-confidence)	0	None predicted	YES	0	Overlap (VC_1772/VC_1776/VC_1777)
vOTU_00877	1	4724	4723	Low-quality	Genome-fragment	14.68	AAI-based (high-confidence)	0	None predicted	NONE	0	Outlier
vOTU_00879	1	9444	9443	Low-quality	Genome-fragment	8.76	AAI-based (high-confidence)	0	Bacteroides	YES	0	Outlier
vOTU_00880	1	6180	6179	Low-quality	Genome-fragment	5.74	AAI-based (high-confidence)	0	Bacteroides	NONE	1266_0	Clustered
vOTU_00882	1	11392	11391	Low-quality	Genome-fragment	8.39	AAI-based (high-confidence)	0	None predicted	NONE	2331_0	Clustered
vOTU_00883	1	15667	15666	Low-quality	Genome-fragment	38.26	AAI-based (high-confidence)	0	Veillonella	YES	0	Outlier
vOTU_00885	1	5565	5564	Low-quality	Genome-fragment	12.36	AAI-based (high-confidence)	0	Roseburia	NONE	0	Outlier
vOTU_00886	1	4027	4026	Low-quality	Genome-fragment	5	AAI-based (high-confidence)	0	None predicted	NONE	0	Outlier
vOTU_00887	1	7266	7265	Low-quality	Genome-fragment	16.15	AAI-based (high-confidence)	0	Clostridium	YES	0	Outlier
vOTU_00888	1	5016	5015	Low-quality	Genome-fragment	17.69	HMM-based (lower-bound)	0	Lachnoclostridium	YES	2192_0	Clustered
vOTU_00889	1	4016	4015	Low-quality	Genome-fragment	3.63	AAI-based (high-confidence)	0	None predicted	NONE	0	Overlap (VC_1106/VC_1109)
vOTU_00890	1	4433	4432	Low-quality	Genome-fragment	10.44	AAI-based (high-confidence)	0	Intestinibacter	NONE	0	Outlier
vOTU_00893	1	14780	14779	Low-quality	Genome-fragment	23.85	AAI-based (high-confidence)	0	None predicted	NONE	0	Outlier
vOTU_00894	1	6645	6644	Low-quality	Genome-fragment	3.65	AAI-based (high-confidence)	0	None predicted	NONE	0	Outlier
vOTU_00895	1	4577	4576	Low-quality	Genome-fragment	4.66	AAI-based (high-confidence)	0	None predicted	NONE	2329_0	Clustered
vOTU_00897	1	16526	16525	Low-quality	Genome-fragment	26.38	AAI-based (high-confidence)	0	None predicted	NONE	2240_0	Clustered
vOTU_00898	1	14177	14176	Low-quality	Genome-fragment	22.54	AAI-based (high-confidence)	0	None predicted	YES	2238_0	Clustered
vOTU_00899	1	7396	7395	Low-quality	Genome-fragment	11.86	AAI-based (high-confidence)	0	None predicted	YES	0	Outlier
vOTU_00900	1	5933	5932	Low-quality	Genome-fragment	9.21	AAI-based (high-confidence)	0	None predicted	NONE	2239_0	Clustered
vOTU_00902	1	18804	18803	Low-quality	Genome-fragment	19.22	AAI-based (medium-confidence)	0	None predicted	NONE	819_0	Clustered
vOTU_00903	1	6000	5999	Low-quality	Genome-fragment	3.4	AAI-based (high-confidence)	0	None predicted	YES	2269_0	Clustered
vOTU_00904	1	59109	59108	Low-quality	Genome-fragment	32.24	AAI-based (high-confidence)	0	None predicted	YES	1118_2	Clustered
vOTU_00905	1	27326	27325	Low-quality	Genome-fragment	14.9	AAI-based (high-confidence)	0	None predicted	NONE	0	Outlier
vOTU_00906	1	26437	26436	Low-quality	Genome-fragment	14.39	AAI-based (high-confidence)	0	None predicted	NONE	0	Outlier
vOTU_00907	1	7635	7634	Low-quality	Genome-fragment	4.17	AAI-based (high-confidence)	0	None predicted	YES	0	Outlier
vOTU_00908	1	6947	6946	Low-quality	Genome-fragment	2.85	AAI-based (high-confidence)	0	None predicted	NONE	1979_0	Clustered
vOTU_00910	1	4081	4080	Low-quality	Genome-fragment	14.4	HMM-based (lower-bound)	0	None predicted	YES	0	Outlier
vOTU_00912	1	6724	6723	Low-quality	Genome-fragment	15.56	AAI-based (high-confidence)	0	Dorea	NONE	2190_0	Clustered
vOTU_00913	1	4880	4879	Low-quality	Genome-fragment	2.77	AAI-based (medium-confidence)	0	None predicted	NONE	0	Outlier
vOTU_00915	1	8235	8234	Low-quality	Genome-fragment	18.35	AAI-based (medium-confidence)	0	Peptostreptococcus	YES	0	Overlap (VC_983/VC_2287)
vOTU_00916	1	5588	5587	Low-quality	Genome-fragment	11.94	AAI-based (high-confidence)	0	Ruminococcus	NONE	1956_0	Clustered
vOTU_00917	1	33254	33253	Low-quality	Genome-fragment	38.06	AAI-based (high-confidence)	0	None predicted	YES	0	Outlier
vOTU_00918	1	19486	19485	Low-quality	Genome-fragment	22.33	AAI-based (high-confidence)	0	None predicted	YES	0	Outlier
vOTU_00919	1	6590	6589	Low-quality	Genome-fragment	7.54	AAI-based (high-confidence)	0	None predicted	NONE	821_0	Clustered
vOTU_00920	1	4783	4782	Low-quality	Genome-fragment	5.48	AAI-based (high-confidence)	0	None predicted	YES	0	Outlier
vOTU_00921	1	7530	7529	Not-determined	Genome-fragment	NA	NA	0	None predicted	YES	2258_0	Clustered
vOTU_00922	1	5067	5066	Not-determined	Genome-fragment	NA	NA	0	None predicted	NONE	2325_0	Clustered
vOTU_00923	1	5935	5934	Not-determined	Genome-fragment	NA	NA	0	None predicted	YES	0	Singleton
vOTU_00924	1	4900	4899	Not-determined	Genome-fragment	NA	NA	0	None predicted	NONE	0	Singleton
vOTU_00925	1	4033	4032	Not-determined	Genome-fragment	NA	NA	0	None predicted	YES	2258_0	Clustered
vOTU_00926	1	8263	8262	Low-quality	Genome-fragment	9.02	AAI-based (medium-confidence)	0	None predicted	YES	2282_0	Clustered
vOTU_00927	1	11572	11571	Not-determined	Genome-fragment	NA	NA	0	None predicted	NONE	2258_0	Clustered
vOTU_00929	1	4284	4283	Low-quality	Genome-fragment	17.44	AAI-based (medium-confidence)	0	None predicted	NONE	0	Singleton
vOTU_00930	1	25701	25700	Medium-quality	Genome-fragment	89.09	AAI-based (high-confidence)	0	None predicted	YES	1933_0	Clustered
vOTU_00931	1	5684	5683	Low-quality	Genome-fragment	20.05	HMM-based (lower-bound)	0	None predicted	YES	2074_0	Clustered
vOTU_00932	1	4102	4101	Low-quality	Genome-fragment	14.63	HMM-based (lower-bound)	0	None predicted	NONE	0	Singleton
vOTU_00933	1	9091	9090	Low-quality	Genome-fragment	18.62	AAI-based (high-confidence)	0	None predicted	NONE	0	Overlap (VC_2295/VC_2296)
vOTU_00934	1	7371	7370	Low-quality	Genome-fragment	14.81	AAI-based (high-confidence)	0	None predicted	YES	0	Outlier
vOTU_00936	1	4049	4048	Low-quality	Genome-fragment	8.13	AAI-based (high-confidence)	0	None predicted	YES	0	Outlier
vOTU_00937	1	5952	5951	Low-quality	Genome-fragment	13.18	AAI-based (high-confidence)	0	Prevotella	YES	0	Outlier
vOTU_00939	1	4729	4728	Low-quality	Genome-fragment	10.52	AAI-based (high-confidence)	0	Odoribacter	YES	0	Outlier
vOTU_00940	1	7463	7462	Low-quality	Genome-fragment	25.87	AAI-based (high-confidence)	0	None predicted	YES	0	Outlier
vOTU_00941	1	7963	7962	Low-quality	Genome-fragment	5.02	AAI-based (high-confidence)	0	None predicted	NONE	2257_0	Clustered
vOTU_00942	1	6777	6776	Not-determined	Genome-fragment	NA	NA	0	None predicted	NONE	2332_0	Clustered
vOTU_00943	1	4584	4583	Low-quality	Genome-fragment	9.21	AAI-based (high-confidence)	0	Clostridioides	NONE	0	Outlier
vOTU_00944	1	7214	7213	Not-determined	Genome-fragment	NA	NA	0	None predicted	YES	2318_0	Clustered
vOTU_00945	1	20404	20403	Low-quality	Genome-fragment	44.89	AAI-based (high-confidence)	0	Bacteroides	YES	0	Outlier
vOTU_00946	1	15260	15259	Low-quality	Genome-fragment	33.75	AAI-based (high-confidence)	0	Odoribacter	YES	0	Outlier
vOTU_00947	1	12841	12840	Low-quality	Genome-fragment	6.68	HMM-based (lower-bound)	0	None predicted	NONE	0	Singleton
vOTU_00948	1	8646	8645	Low-quality	Genome-fragment	19.23	AAI-based (high-confidence)	0	Bacteroides	YES	0	Outlier
vOTU_00949	1	7693	7692	Low-quality	Genome-fragment	16.96	AAI-based (high-confidence)	0	Parabacteroides	NONE	1028_0	Clustered
vOTU_00951	1	5853	5852	Low-quality	Genome-fragment	1.59	AAI-based (medium-confidence)	0	None predicted	YES	0	Outlier
vOTU_00952	1	5376	5375	Low-quality	Genome-fragment	6.27	AAI-based (high-confidence)	0	None predicted	NONE	1815_0	Clustered
vOTU_00954	1	18577	18576	Low-quality	Genome-fragment	12.83	AAI-based (high-confidence)	0	None predicted	YES	0	Outlier
vOTU_00955	1	11008	11007	Low-quality	Genome-fragment	24.43	AAI-based (high-confidence)	0	Bacteroides	YES	0	Outlier
vOTU_00960	1	6779	6778	Low-quality	Genome-fragment	20.28	AAI-based (high-confidence)	0	None predicted	YES	0	Outlier
vOTU_00961	1	5639	5638	Low-quality	Genome-fragment	2.6	AAI-based (high-confidence)	0	Bifidobacterium	NONE	0	Singleton
vOTU_00962	1	12488	12487	Low-quality	Genome-fragment	20.29	AAI-based (high-confidence)	0	None predicted	NONE	0	Outlier
vOTU_00963	1	12664	12663	Low-quality	Genome-fragment	28.33	AAI-based (high-confidence)	0	None predicted	YES	1965_0	Clustered
vOTU_00964	1	6981	6980	Low-quality	Genome-fragment	16.88	AAI-based (high-confidence)	0	Veillonella	YES	0	Outlier
vOTU_00965	1	5024	5023	Low-quality	Genome-fragment	12.27	AAI-based (high-confidence)	0	None predicted	YES	2024_0	Clustered
vOTU_00966	1	16867	16866	Low-quality	Genome-fragment	37.28	AAI-based (high-confidence)	0	Bacteroides	YES	0	Outlier
vOTU_00967	1	7972	7971	Low-quality	Genome-fragment	7.75	AAI-based (high-confidence)	0	None predicted	YES	0	Outlier
vOTU_00968	1	4108	4107	Low-quality	Genome-fragment	9.17	AAI-based (high-confidence)	0	Bacteroides	NONE	0	Singleton
vOTU_00969	1	4335	4334	Low-quality	Genome-fragment	8.36	AAI-based (high-confidence)	0	Clostridioides	YES	0	Outlier
vOTU_00970	1	8720	8719	Low-quality	Genome-fragment	26.84	AAI-based (high-confidence)	0	None predicted	NONE	0	Overlap (VC_1772/VC_1776/VC_1777)
vOTU_00972	1	8248	8247	Low-quality	Genome-fragment	18.32	AAI-based (high-confidence)	0	Clostridium	NONE	2190_0	Clustered
vOTU_00975	1	7339	7338	Low-quality	Genome-fragment	16.6	AAI-based (high-confidence)	0	Kineothrix	YES	2190_0	Clustered
vOTU_00976	1	6912	6911	Low-quality	Genome-fragment	15	AAI-based (high-confidence)	0	Bacteroides	YES	0	Outlier
vOTU_00977	1	4685	4684	Low-quality	Genome-fragment	15.22	AAI-based (high-confidence)	0	None predicted	YES	1155_0	Clustered
vOTU_00979	1	8468	8467	Low-quality	Genome-fragment	47.01	AAI-based (medium-confidence)	0	None predicted	YES	0	Outlier
vOTU_00981	1	8885	8884	Low-quality	Genome-fragment	28.03	AAI-based (high-confidence)	0	Salmonella	YES	0	Outlier
vOTU_00982	12266	48457	36191	High-quality	High-quality	99.93	AAI-based (high-confidence)	0	Escherichia	YES	919_0	Clustered
vOTU_00984	1	89291	89290	Medium-quality	Genome-fragment	85.88	AAI-based (high-confidence)	0	Escherichia	YES	334_0	Clustered
vOTU_00985	30202	102125	71923	High-quality	High-quality	100	AAI-based (high-confidence)	11.25	None predicted	NONE	1504_1	Clustered
vOTU_00986	1	35470	35469	Complete	High-quality	100	DTR (medium-confidence)	0	Clostridium	YES	0	Overlap (VC_988/VC_2215)
vOTU_00987	68875	116478	47603	Low-quality	Genome-fragment	46.17	HMM-based (lower-bound)	13.34	Akkermansia	YES	2139_0	Clustered
vOTU_00988	18789	85384	66595	High-quality	High-quality	90.04	AAI-based (high-confidence)	11.61	Bacteroides	YES	2085_0	Clustered
vOTU_00989	1	41161	41160	High-quality	High-quality	100	AAI-based (high-confidence)	0	Anaerostipes	YES	0	Outlier
vOTU_00990	1	10099	10098	Low-quality	Genome-fragment	5.99	AAI-based (high-confidence)	0	None predicted	YES	0	Outlier
vOTU_00991	1	21899	21898	Medium-quality	Genome-fragment	56.81	AAI-based (high-confidence)	9.67	Salmonella	NONE	4_0	Clustered
vOTU_00992	20024	131217	111193	High-quality	High-quality	99.72	AAI-based (high-confidence)	0	Bacteroides	YES	1835_6	Clustered
vOTU_00994	1	19335	19334	Low-quality	Genome-fragment	37.61	AAI-based (high-confidence)	0	Salmonella	NONE	57_0	Clustered
vOTU_00996	1	13269	13268	Low-quality	Genome-fragment	39.49	AAI-based (high-confidence)	0	Streptococcus	YES	0	Outlier
vOTU_00997	1	87013	87012	Complete	High-quality	100	DTR (high-confidence)	0	None predicted	YES	0	Overlap (VC_1527/VC_2198)
vOTU_00998	1	51297	51296	Complete	High-quality	100	DTR (high-confidence)	0	None predicted	NONE	624_0	Clustered
vOTU_00999	8537	51119	42582	High-quality	High-quality	93.24	AAI-based (medium-confidence)	18.05	Erysipelatoclostridium	YES	2030_0	Clustered
vOTU_01000	1	68452	68451	High-quality	High-quality	91.45	AAI-based (high-confidence)	4.25	Clostridium	NONE	913_0	Clustered
vOTU_01001	126704	164845	38141	Medium-quality	Genome-fragment	88.23	AAI-based (high-confidence)	0	Veillonella	NONE	1847_0	Clustered
vOTU_01002	1	46435	46434	Complete	High-quality	100	Provirus (medium-confidence)	30.87	Bifidobacterium	NONE	1884_0	Clustered
vOTU_01003	14668	55808	41140	Medium-quality	Genome-fragment	80.86	AAI-based (high-confidence)	30.32	Ruminococcus	YES	1903_0	Clustered
vOTU_01004	1	17281	17280	Low-quality	Genome-fragment	32.66	AAI-based (medium-confidence)	0	Bacteroides	YES	0	Outlier
vOTU_01006	66759	101456	34697	Medium-quality	Genome-fragment	89.75	AAI-based (high-confidence)	0	Ruminococcus	YES	1839_0	Clustered
vOTU_01007	1	41571	41570	Complete	High-quality	100	DTR (high-confidence)	0	Blautia	YES	671_0	Clustered
vOTU_01008	1	5095	5094	Complete	High-quality	100	DTR (high-confidence)	0	Phascolarctobacterium	NONE	1432_0	Clustered
vOTU_01009	1	21216	21215	Low-quality	Genome-fragment	46.43	AAI-based (medium-confidence)	0	Erysipelatoclostridium	YES	912_0	Clustered
vOTU_01010	1	18527	18526	Medium-quality	Genome-fragment	52.81	AAI-based (high-confidence)	0	Salmonella	YES	4_0	Clustered
vOTU_01012	1	30098	30097	Medium-quality	Genome-fragment	69.69	AAI-based (medium-confidence)	0	Sutterella	NONE	2015_0	Clustered
vOTU_01013	1	44146	44145	Complete	High-quality	100	DTR (high-confidence)	0	Blautia	NONE	1522_0	Clustered
vOTU_01014	47417	101864	54447	Low-quality	Genome-fragment	47.33	AAI-based (medium-confidence)	0	None predicted	NONE	1931_0	Clustered
vOTU_01015	1	8047	8046	Low-quality	Genome-fragment	22.28	AAI-based (medium-confidence)	0	Clostridioides	NONE	1498_0	Clustered
vOTU_01016	54811	125635	70824	High-quality	High-quality	100	AAI-based (high-confidence)	0	Bacteroides	NONE	1915_1	Clustered
vOTU_01017	193987	229184	35197	Medium-quality	Genome-fragment	57.33	AAI-based (high-confidence)	0	Bacteroides	YES	1259_8	Clustered
vOTU_01018	389	40242	39853	Medium-quality	Genome-fragment	88.18	AAI-based (medium-confidence)	0	Salmonella	NONE	63_0	Clustered
vOTU_01019	102510	146260	43750	High-quality	High-quality	100	AAI-based (high-confidence)	0	Bifidobacterium	NONE	1883_0	Clustered
vOTU_01020	44367	82045	37678	Medium-quality	Genome-fragment	64.18	AAI-based (medium-confidence)	17.55	Bacteroides	NONE	1943_0	Clustered
vOTU_01021	1	12312	12311	Low-quality	Genome-fragment	37.36	AAI-based (high-confidence)	0	None predicted	NONE	0	Overlap (VC_1770/VC_1776)
vOTU_01022	76738	115961	39223	High-quality	High-quality	100	AAI-based (high-confidence)	4.98	Erysipelatoclostridium	YES	1149_0	Clustered
vOTU_01023	1	29183	29182	Medium-quality	Genome-fragment	75.56	AAI-based (medium-confidence)	0	Parabacteroides	NONE	0	Outlier
vOTU_01024	85	28178	28093	Medium-quality	Genome-fragment	64.59	AAI-based (high-confidence)	0	None predicted	YES	291_0	Clustered
vOTU_01025	16475	33378	16903	Low-quality	Genome-fragment	28.28	HMM-based (lower-bound)	0	Lactobacillus	NONE	0	Singleton
vOTU_01026	1	13325	13324	Low-quality	Genome-fragment	36.84	AAI-based (high-confidence)	0	None predicted	YES	884_0	Clustered
vOTU_01027	35727	74728	39001	Medium-quality	Genome-fragment	53.3	AAI-based (high-confidence)	0	Parabacteroides	NONE	1906_0	Clustered
vOTU_01028	117212	182856	65644	High-quality	High-quality	100	AAI-based (high-confidence)	0	Bacteroides	NONE	0	Outlier
vOTU_01029	28742	61522	32780	Medium-quality	Genome-fragment	80.86	AAI-based (high-confidence)	0	Prevotella	NONE	837_0	Clustered
vOTU_01030	1	8032	8031	Low-quality	Genome-fragment	19.88	AAI-based (high-confidence)	0	Lactobacillus	YES	0	Outlier
vOTU_01031	1	27300	27299	Low-quality	Genome-fragment	30.29	AAI-based (high-confidence)	0	Escherichia	NONE	0	Outlier
vOTU_01032	1	84965	84964	Complete	High-quality	100	DTR (high-confidence)	0	None predicted	YES	1507_1	Clustered
vOTU_01033	1	24565	24564	Medium-quality	Genome-fragment	65.08	AAI-based (high-confidence)	0	Bifidobacterium	YES	1165_0	Clustered
vOTU_01034	241449	281506	40057	Medium-quality	Genome-fragment	89.66	AAI-based (high-confidence)	8.36	Veillonella	YES	1054_0	Clustered
vOTU_01035	1	39736	39735	High-quality	High-quality	99.14	AAI-based (high-confidence)	0	Veillonella	NONE	1849_0	Clustered
vOTU_01036	28485	60331	31846	Medium-quality	Genome-fragment	84.18	AAI-based (high-confidence)	0	Bifidobacterium	NONE	1801_0	Clustered
vOTU_01037	3698	34991	31293	Medium-quality	Genome-fragment	82.09	AAI-based (high-confidence)	0	Bifidobacterium	NONE	0	Overlap (VC_1164/VC_1496)
vOTU_01038	1	37233	37232	Medium-quality	Genome-fragment	82.77	AAI-based (high-confidence)	19.36	Roseburia	YES	2135_0	Clustered
vOTU_01039	7270	53986	46716	Medium-quality	Genome-fragment	73.6	AAI-based (high-confidence)	0	Bacteroides	YES	1259_8	Clustered
vOTU_01040	1	12733	12732	High-quality	High-quality	100	AAI-based (high-confidence)	0	Bacteroides	YES	1765_0	Clustered
vOTU_01041	1	44172	44171	Complete	High-quality	100	DTR (high-confidence)	0	Bacteroides	YES	1026_0	Clustered
vOTU_01042	121584	136210	14626	Low-quality	Genome-fragment	35.95	AAI-based (high-confidence)	0	None predicted	YES	1143_0	Clustered
vOTU_01043	57108	101762	44654	High-quality	High-quality	92.25	AAI-based (medium-confidence)	0	Bacteroides	NONE	1819_0	Clustered
vOTU_01044	18785	78757	59972	High-quality	High-quality	98.93	AAI-based (high-confidence)	0	Ruminococcus	NONE	1909_0	Clustered
vOTU_01045	90	37074	36984	Medium-quality	Genome-fragment	82.14	AAI-based (medium-confidence)	5.98	None predicted	NONE	0	Outlier
vOTU_01048	19325	93759	74434	High-quality	High-quality	100	AAI-based (high-confidence)	9.78	Bacteroides	YES	1818_1	Clustered
vOTU_01049	4796	30968	26172	Medium-quality	Genome-fragment	66.79	AAI-based (high-confidence)	0	Bifidobacterium	NONE	1689_0	Clustered
vOTU_01050	1	16275	16274	High-quality	High-quality	95.55	AAI-based (medium-confidence)	0	None predicted	YES	2186_0	Clustered
vOTU_01051	1	5271	5270	Not-determined	Genome-fragment	NA	NA	0	None predicted	NONE	2188_0	Clustered
vOTU_01052	1	56212	56211	Medium-quality	Genome-fragment	79.51	AAI-based (medium-confidence)	0	Megamonas	NONE	2140_0	Clustered
vOTU_01053	1	59823	59822	Medium-quality	Genome-fragment	81.4	AAI-based (high-confidence)	36.68	None predicted	YES	0	Outlier
vOTU_01054	1	41295	41294	Complete	High-quality	100	DTR (high-confidence)	0	Veillonella	YES	2019_0	Clustered
vOTU_01055	1	29934	29933	Medium-quality	Genome-fragment	75.55	AAI-based (high-confidence)	0	None predicted	YES	1734_0	Clustered
vOTU_01056	113582	160104	46522	Complete	High-quality	100	Provirus (high-confidence)	19.03	Roseburia	YES	1839_0	Clustered
vOTU_01058	410	48239	47829	High-quality	High-quality	98.81	AAI-based (high-confidence)	0	Bacteroides	NONE	1819_0	Clustered
vOTU_01059	1	35526	35525	Medium-quality	Genome-fragment	65.64	AAI-based (high-confidence)	0	Faecalibacterium	YES	1591_0	Clustered
vOTU_01061	73379	134458	61079	High-quality	High-quality	100	AAI-based (high-confidence)	0	None predicted	NONE	996_1	Clustered
vOTU_01062	1	15491	15490	Medium-quality	Genome-fragment	68.54	AAI-based (medium-confidence)	0	Erysipelatoclostridium	NONE	1830_0	Clustered
vOTU_01063	1	21521	21520	Medium-quality	Genome-fragment	54.04	AAI-based (high-confidence)	0	None predicted	NONE	863_0	Clustered
vOTU_01064	21372	54142	32770	Medium-quality	Genome-fragment	75.72	AAI-based (high-confidence)	0	Klebsiella	NONE	38_0	Clustered
vOTU_01065	1	73830	73829	High-quality	High-quality	100	AAI-based (high-confidence)	0	Bacteroides	NONE	1915_1	Clustered
vOTU_01066	3203	28101	24898	Medium-quality	Genome-fragment	65.02	AAI-based (high-confidence)	0	None predicted	NONE	1583_0	Clustered
vOTU_01067	595792	651699	55907	Medium-quality	Genome-fragment	77.28	HMM-based (lower-bound)	0	Parabacteroides	YES	2051_0	Clustered
vOTU_01068	1	6737	6736	Complete	High-quality	100	DTR (high-confidence)	0	Bacteroides	YES	1765_0	Clustered
vOTU_01069	18631	45172	26541	Medium-quality	Genome-fragment	61	AAI-based (medium-confidence)	0	None predicted	YES	0	Overlap (VC_1963/VC_1964)
vOTU_01070	423	56973	56550	High-quality	High-quality	92.53	AAI-based (high-confidence)	0	None predicted	NONE	1501_0	Clustered
vOTU_01071	1	16477	16476	Medium-quality	Genome-fragment	83.6	AAI-based (medium-confidence)	0	Enterocloster	YES	2071_0	Clustered
vOTU_01072	1	98837	98836	High-quality	High-quality	90.7	AAI-based (high-confidence)	0	Porphyromonas	YES	1102_0	Clustered
vOTU_01073	1	21363	21362	Low-quality	Genome-fragment	48.2	AAI-based (high-confidence)	0	Flavonifractor	YES	0	Outlier
vOTU_01074	11300	52624	41324	Medium-quality	Genome-fragment	61.71	AAI-based (high-confidence)	48.4	None predicted	NONE	1587_0	Clustered
vOTU_01075	1	10709	10708	Low-quality	Genome-fragment	21.54	AAI-based (high-confidence)	0	None predicted	YES	2068_0	Clustered
vOTU_01076	1	41257	41256	Complete	High-quality	100	DTR (high-confidence)	0	Veillonella	NONE	2019_0	Clustered
vOTU_01077	33421	56651	23230	Medium-quality	Genome-fragment	64.1	AAI-based (high-confidence)	0	Coprobacillus	NONE	0	Overlap (VC_1150/VC_2106)
vOTU_01078	1	35837	35836	High-quality	High-quality	90.55	AAI-based (high-confidence)	0	Bifidobacterium	NONE	1883_0	Clustered
vOTU_01079	1	4537	4536	Not-determined	Genome-fragment	NA	NA	0	None predicted	NONE	2063_0	Clustered
vOTU_01080	1	73337	73336	High-quality	High-quality	100	AAI-based (medium-confidence)	0	None predicted	YES	0	Outlier
vOTU_01081	5666	45439	39773	High-quality	High-quality	100	AAI-based (high-confidence)	0	None predicted	YES	0	Overlap (VC_671/VC_1731)
vOTU_01082	1	56341	56340	Medium-quality	Genome-fragment	71.72	AAI-based (high-confidence)	0	Bacteroides	YES	1917_1	Clustered
vOTU_01083	72049	127961	55912	Medium-quality	Genome-fragment	88.12	AAI-based (high-confidence)	3.97	None predicted	YES	1504_0	Clustered
vOTU_01084	1	18234	18233	High-quality	High-quality	100	AAI-based (high-confidence)	0	Bifidobacterium	YES	1793_0	Clustered
vOTU_01085	1	60714	60713	High-quality	High-quality	99.38	AAI-based (high-confidence)	0	None predicted	YES	1504_1	Clustered
vOTU_01086	28806	48991	20185	Low-quality	Genome-fragment	33.49	AAI-based (medium-confidence)	0	None predicted	NONE	1515_0	Clustered
vOTU_01087	52604	110070	57466	High-quality	High-quality	98.45	AAI-based (high-confidence)	0	Bacteroides	YES	1868_0	Clustered
vOTU_01088	1	172672	172671	Complete	High-quality	100	DTR (high-confidence)	0	None predicted	YES	1119_1	Clustered
vOTU_01089	74162	109595	35433	High-quality	High-quality	93.58	AAI-based (high-confidence)	0	Bifidobacterium	NONE	1801_0	Clustered
vOTU_01090	181045	212772	31727	High-quality	High-quality	90.05	AAI-based (high-confidence)	0	Raoultella	YES	0	Overlap (VC_189/VC_1270)
vOTU_01091	1	17094	17093	Low-quality	Genome-fragment	46.18	AAI-based (high-confidence)	0	Erysipelatoclostridium	NONE	1015_0	Clustered
vOTU_01092	1	41128	41127	High-quality	High-quality	100	AAI-based (high-confidence)	0	Salmonella	NONE	30_1	Clustered
vOTU_01093	1	18806	18805	Low-quality	Genome-fragment	35.93	AAI-based (high-confidence)	12.52	Salmonella	NONE	0	Outlier
vOTU_01094	1	6994	6993	Complete	High-quality	100	DTR (high-confidence)	0	None predicted	YES	0	Outlier
vOTU_01096	1	19769	19768	Low-quality	Genome-fragment	24.01	AAI-based (high-confidence)	0	None predicted	YES	0	Overlap (VC_1956/VC_2095)
vOTU_01097	1	33338	33337	High-quality	High-quality	94.62	AAI-based (high-confidence)	0	Methylocaldum	NONE	0	Overlap (VC_189/VC_1270)
vOTU_01098	1	39624	39623	Medium-quality	Genome-fragment	86.61	AAI-based (high-confidence)	0	Ruminococcus	YES	1904_0	Clustered
vOTU_01099	8367	67768	59401	High-quality	High-quality	100	AAI-based (high-confidence)	0	Eubacterium	YES	1526_2	Clustered/Singleton
vOTU_01100	1	48460	48459	High-quality	High-quality	100	AAI-based (high-confidence)	0	Haemophilus	NONE	0	Overlap (VC_446/VC_456)
vOTU_01101	1	54158	54157	High-quality	High-quality	99	AAI-based (high-confidence)	0	Bifidobacterium	NONE	804_0	Clustered
vOTU_01102	1	34799	34798	High-quality	High-quality	100	AAI-based (high-confidence)	0	Olsenella	NONE	1587_0	Clustered
vOTU_01103	1	6611	6610	Complete	High-quality	100	DTR (high-confidence)	0	Bacteroides	NONE	1765_0	Clustered
vOTU_01104	6696	37147	30451	Medium-quality	Genome-fragment	62.91	AAI-based (medium-confidence)	0	None predicted	NONE	1819_0	Clustered
vOTU_01105	1	87015	87014	Complete	High-quality	100	DTR (high-confidence)	0	Clostridium	YES	899_0	Clustered
vOTU_01106	1	81161	81160	Medium-quality	Genome-fragment	78.23	AAI-based (high-confidence)	0	Escherichia	YES	334_0	Clustered
vOTU_01107	1	16574	16573	Complete	High-quality	100	DTR (high-confidence)	0	Bifidobacterium	YES	0	Overlap (VC_2098/VC_2210)
vOTU_01108	1	12869	12868	Low-quality	Genome-fragment	34.89	AAI-based (high-confidence)	0	None predicted	YES	0	Outlier
vOTU_01109	160747	216167	55420	High-quality	High-quality	100	AAI-based (high-confidence)	11.28	None predicted	YES	0	Overlap (VC_936/VC_1345)
vOTU_01110	1	10440	10439	Low-quality	Genome-fragment	26.08	AAI-based (medium-confidence)	0	Clostridium	NONE	580_0	Clustered
vOTU_01111	33170	77835	44665	Medium-quality	Genome-fragment	87.4	AAI-based (high-confidence)	0	Roseburia	NONE	1523_1	Clustered
vOTU_01113	1	20953	20952	Medium-quality	Genome-fragment	56.03	AAI-based (high-confidence)	0	None predicted	NONE	0	Outlier
vOTU_01114	9493	54186	44693	High-quality	High-quality	100	AAI-based (high-confidence)	0	Erysipelatoclostridium	NONE	0	Overlap (VC_842/VC_1732)
vOTU_01115	1	39213	39212	Complete	High-quality	100	DTR (high-confidence)	0	Clostridium	YES	0	Outlier
vOTU_01116	1	12151	12150	Low-quality	Genome-fragment	33.58	HMM-based (lower-bound)	0	None predicted	NONE	2207_0	Clustered
vOTU_01117	1	41392	41391	Complete	High-quality	100	DTR (high-confidence)	0	Hungatella	YES	0	Overlap (VC_682/VC_1526/VC_2035)
vOTU_01118	2166	43486	41320	High-quality	High-quality	100	AAI-based (high-confidence)	0	None predicted	YES	0	Overlap (VC_671/VC_1731)
vOTU_01119	40707	93378	52671	High-quality	High-quality	100	AAI-based (high-confidence)	25.04	Ruminococcus	NONE	1903_0	Clustered
vOTU_01120	1	16090	16089	Low-quality	Genome-fragment	48.76	HMM-based (lower-bound)	0	Bifidobacterium	NONE	2163_0	Clustered
vOTU_01121	1	13033	13032	Low-quality	Genome-fragment	12.53	AAI-based (high-confidence)	0	Escherichia	YES	336_0	Clustered
vOTU_01122	1	19551	19550	Low-quality	Genome-fragment	48.01	AAI-based (high-confidence)	0	Clostridium	NONE	1899_0	Clustered
vOTU_01123	8519	39270	30751	High-quality	High-quality	97.22	AAI-based (high-confidence)	0	Salmonella	YES	226_0	Clustered
vOTU_01124	1	29257	29256	Medium-quality	Genome-fragment	75.45	AAI-based (high-confidence)	0	Bifidobacterium	NONE	1093_0	Clustered
vOTU_01125	1	36810	36809	High-quality	High-quality	100	AAI-based (high-confidence)	0	None predicted	NONE	4_0	Clustered
vOTU_01126	1	45056	45055	High-quality	High-quality	100	AAI-based (high-confidence)	0	Sutterella	NONE	2016_0	Clustered
vOTU_01127	1	38380	38379	Medium-quality	Genome-fragment	58.66	AAI-based (high-confidence)	0	Ruminococcus	NONE	2177_0	Clustered
vOTU_01128	6250	59215	52965	Medium-quality	Genome-fragment	67.88	AAI-based (high-confidence)	17.08	Bacteroides	NONE	0	Outlier
vOTU_01129	1	20397	20396	Medium-quality	Genome-fragment	51.73	AAI-based (high-confidence)	0	Blautia	YES	0	Outlier
vOTU_01130	84864	117155	32291	Medium-quality	Genome-fragment	79.51	AAI-based (medium-confidence)	0	Ruminococcus	YES	1950_0	Clustered
vOTU_01131	1	139185	139184	High-quality	High-quality	100	AAI-based (high-confidence)	0	Faecalibacterium	YES	1973_0	Clustered
vOTU_01132	5775	64282	58507	Medium-quality	Genome-fragment	83.57	HMM-based (lower-bound)	0	None predicted	YES	1934_0	Clustered
vOTU_01133	127449	172483	45034	High-quality	High-quality	93.04	AAI-based (high-confidence)	0	Bacteroides	NONE	1819_0	Clustered
vOTU_01134	1	52925	52924	High-quality	High-quality	97.34	AAI-based (high-confidence)	0	Faecalibacterium	YES	0	Outlier
vOTU_01135	1	96149	96148	High-quality	High-quality	100	AAI-based (high-confidence)	0	None predicted	YES	1111_0	Clustered
vOTU_01136	47594	76853	29259	Low-quality	Genome-fragment	47.71	AAI-based (high-confidence)	0	Bacteroides	YES	0	Overlap (VC_2001/VC_2004)
vOTU_01137	113434	188416	74982	Complete	High-quality	100	Provirus (high-confidence)	18.4	Bacteroides	NONE	1818_2	Clustered
vOTU_01138	1	37878	37877	Medium-quality	Genome-fragment	89.79	AAI-based (high-confidence)	0	Faecalibacterium	YES	1786_0	Clustered
vOTU_01139	30943	74109	43166	Medium-quality	Genome-fragment	77.09	AAI-based (medium-confidence)	12.58	None predicted	YES	0	Outlier
vOTU_01140	5518	20646	15128	Low-quality	Genome-fragment	32.72	AAI-based (medium-confidence)	0	None predicted	NONE	0	Outlier
vOTU_01142	1	170544	170543	Complete	High-quality	100	DTR (high-confidence)	0	None predicted	YES	1119_1	Clustered
vOTU_01143	1	149907	149906	Complete	High-quality	100	DTR (high-confidence)	0	Parabacteroides	NONE	949_2	Clustered
vOTU_01144	1	30892	30891	Medium-quality	Genome-fragment	77.91	AAI-based (high-confidence)	0	Bifidobacterium	NONE	0	Overlap (VC_1693/VC_2162)
vOTU_01145	1	26101	26100	Medium-quality	Genome-fragment	61.72	AAI-based (high-confidence)	0	Blautia	YES	1888_0	Clustered
vOTU_01146	1	45801	45800	High-quality	High-quality	100	AAI-based (high-confidence)	0	Blautia	NONE	360_0	Clustered
vOTU_01147	1	43389	43388	Complete	High-quality	100	DTR (high-confidence)	0	Faecalibacterium	YES	1786_0	Clustered
vOTU_01148	20060	51615	31555	High-quality	High-quality	97.2	AAI-based (high-confidence)	0	Bacteroides	NONE	1817_0	Clustered
vOTU_01149	1	15592	15591	Low-quality	Genome-fragment	37.32	AAI-based (high-confidence)	0	Veillonella	YES	0	Outlier
vOTU_01150	1	44604	44603	High-quality	High-quality	92.69	AAI-based (medium-confidence)	15.85	None predicted	YES	883_0	Clustered
vOTU_01151	6363	43112	36749	Medium-quality	Genome-fragment	81.79	AAI-based (high-confidence)	0	Haemophilus	NONE	1140_0	Clustered
vOTU_01152	52462	175539	123077	Medium-quality	Genome-fragment	70.68	AAI-based (high-confidence)	0	Ruminococcus	YES	512_0	Clustered
vOTU_01153	1	42459	42458	High-quality	High-quality	100	AAI-based (high-confidence)	0	Faecalibacterium	YES	1786_0	Clustered
vOTU_01154	448	84598	84150	High-quality	High-quality	100	AAI-based (high-confidence)	17.92	None predicted	YES	1447_1	Clustered
vOTU_01155	1	15638	15637	Medium-quality	Genome-fragment	69.85	AAI-based (medium-confidence)	0	None predicted	NONE	2058_0	Clustered
vOTU_01156	1	24962	24961	Medium-quality	Genome-fragment	59.1	AAI-based (high-confidence)	0	Salmonella	YES	290_0	Clustered
vOTU_01157	1	6296	6295	Complete	High-quality	100	DTR (high-confidence)	0	Parabacteroides	YES	1567_0	Clustered
vOTU_01159	1	11201	11200	Low-quality	Genome-fragment	24.22	AAI-based (high-confidence)	0	Anaerostipes	YES	2133_0	Clustered
vOTU_01160	859	62286	61427	Medium-quality	Genome-fragment	89.38	AAI-based (high-confidence)	27.89	Bacteroides	YES	1916_0	Clustered
vOTU_01161	113908	185747	71839	High-quality	High-quality	100	AAI-based (high-confidence)	0	Bacteroides	YES	1915_1	Clustered
vOTU_01162	1	6558	6557	Complete	High-quality	100	DTR (high-confidence)	0	Bacteroides	NONE	1493_0	Clustered
vOTU_01163	21436	53562	32126	Low-quality	Genome-fragment	21.46	HMM-based (lower-bound)	0	None predicted	NONE	2248_0	Clustered
vOTU_01164	103124	143974	40850	High-quality	High-quality	96.61	AAI-based (high-confidence)	0	None predicted	NONE	2006_0	Clustered
vOTU_01165	1	66044	66043	High-quality	High-quality	100	AAI-based (high-confidence)	0	Bacteroides	NONE	1818_2	Clustered
vOTU_01166	1	16119	16118	Low-quality	Genome-fragment	32.27	AAI-based (high-confidence)	0	Salmonella	NONE	0	Outlier
vOTU_01167	381	46503	46122	Medium-quality	Genome-fragment	61.15	AAI-based (high-confidence)	32.92	None predicted	YES	2118_0	Clustered
vOTU_01168	1	58328	58327	High-quality	High-quality	100	AAI-based (high-confidence)	0	None predicted	NONE	2157_0	Clustered
vOTU_01169	17760	90050	72290	Medium-quality	Genome-fragment	66.51	AAI-based (medium-confidence)	0	Sutterella	YES	926_0	Clustered
vOTU_01170	1	41955	41954	High-quality	High-quality	100	AAI-based (high-confidence)	0	Dialister	YES	857_0	Clustered
vOTU_01171	238	16197	15959	Low-quality	Genome-fragment	32.12	AAI-based (high-confidence)	0	Salmonella	YES	0	Outlier
vOTU_01172	1	12239	12238	Low-quality	Genome-fragment	34.59	AAI-based (high-confidence)	0	Collinsella	YES	1995_0	Clustered
vOTU_01173	191812	276158	84346	High-quality	High-quality	100	AAI-based (high-confidence)	34.61	Blautia	NONE	0	Overlap (VC_2138/VC_2154)
vOTU_01174	1	43536	43535	Medium-quality	Genome-fragment	85.67	AAI-based (medium-confidence)	30.27	Ruminococcus	YES	1903_0	Clustered
vOTU_01175	1	21743	21742	Low-quality	Genome-fragment	49.99	AAI-based (high-confidence)	0	None predicted	NONE	291_0	Clustered
vOTU_01176	1	43066	43065	High-quality	High-quality	99.29	AAI-based (medium-confidence)	0	Bacteroides	YES	1962_0	Clustered
vOTU_01177	1	91973	91972	Medium-quality	Genome-fragment	82.48	AAI-based (high-confidence)	0	None predicted	YES	1835_5	Clustered
vOTU_01178	1	28011	28010	Medium-quality	Genome-fragment	76.12	AAI-based (high-confidence)	0	None predicted	NONE	0	Overlap (VC_1849/VC_1853)
vOTU_01179	1	23734	23733	Medium-quality	Genome-fragment	68.4	AAI-based (medium-confidence)	0	Tyzzerella	YES	348_0	Clustered
vOTU_01180	54700	100147	45447	High-quality	High-quality	99.21	AAI-based (high-confidence)	0	None predicted	NONE	983_0	Clustered
vOTU_01181	8917	76560	67643	High-quality	High-quality	100	AAI-based (medium-confidence)	9.68	Parabacteroides	YES	1975_1	Clustered
vOTU_01183	1	53208	53207	High-quality	High-quality	91.38	AAI-based (high-confidence)	0	None predicted	YES	1846_0	Clustered
vOTU_01184	1	44461	44460	High-quality	High-quality	93.85	AAI-based (high-confidence)	15.71	Enterocloster	YES	670_0	Clustered
vOTU_01185	329	108469	108140	High-quality	High-quality	96.98	AAI-based (high-confidence)	0	Bacteroides	NONE	1835_6	Clustered
vOTU_01186	1	70697	70696	High-quality	High-quality	100	AAI-based (high-confidence)	0	None predicted	NONE	935_2	Clustered
vOTU_01187	21486	60309	38823	High-quality	High-quality	94.79	AAI-based (high-confidence)	10.55	Faecalibacterium	YES	1569_1	Clustered
vOTU_01188	49	114395	114346	Medium-quality	Genome-fragment	68.15	AAI-based (high-confidence)	0	Blautia	NONE	509_1	Clustered/Singleton
vOTU_01189	1	69842	69841	Medium-quality	Genome-fragment	81.04	AAI-based (high-confidence)	0	None predicted	NONE	1812_0	Clustered
vOTU_01190	1	97324	97323	High-quality	High-quality	100	AAI-based (high-confidence)	0	None predicted	NONE	1114_0	Clustered
vOTU_01191	1	21727	21726	Medium-quality	Genome-fragment	51.37	AAI-based (high-confidence)	0	Dorea	YES	0	Outlier
vOTU_01192	33027	53637	20610	Low-quality	Genome-fragment	45.51	AAI-based (high-confidence)	22.98	Salmonella	YES	62_0	Clustered
vOTU_01193	1	85008	85007	High-quality	High-quality	100	AAI-based (high-confidence)	0	None predicted	YES	1507_1	Clustered
vOTU_01196	1	35229	35228	High-quality	High-quality	100	AAI-based (medium-confidence)	0	None predicted	YES	0	Outlier
vOTU_01197	1	85578	85577	Complete	High-quality	100	DTR (high-confidence)	0	None predicted	YES	1810_0	Clustered
vOTU_01199	34745	193074	158329	High-quality	High-quality	95.11	AAI-based (high-confidence)	24.86	Prevotella	NONE	2001_3	Clustered
vOTU_01200	1	31190	31189	High-quality	High-quality	91.42	AAI-based (high-confidence)	0	Veillonella	YES	1865_0	Clustered
vOTU_01201	1	17511	17510	Medium-quality	Genome-fragment	53.71	HMM-based (lower-bound)	0	Eggerthella	NONE	2164_0	Clustered
vOTU_01202	1	62593	62592	Medium-quality	Genome-fragment	79.01	AAI-based (high-confidence)	0	None predicted	NONE	997_0	Clustered
vOTU_01203	183583	243666	60083	High-quality	High-quality	100	AAI-based (high-confidence)	29.25	Akkermansia	NONE	2150_0	Clustered
vOTU_01204	45758	99631	53873	High-quality	High-quality	99.38	AAI-based (high-confidence)	0	Faecalibacterium	NONE	1591_0	Clustered
vOTU_01205	1	64301	64300	Complete	High-quality	100	DTR (high-confidence)	5.24	None predicted	NONE	2178_0	Clustered
vOTU_01206	1436	15049	13613	Low-quality	Genome-fragment	32.32	AAI-based (high-confidence)	0	Flavonifractor	NONE	0	Outlier
vOTU_01208	1	36402	36401	Medium-quality	Genome-fragment	61.11	AAI-based (high-confidence)	0	Faecalibacterium	NONE	0	Outlier
vOTU_01209	7881	24435	16554	Low-quality	Genome-fragment	21.54	HMM-based (lower-bound)	0	None predicted	NONE	1983_0	Clustered
vOTU_01210	151595	183164	31569	High-quality	High-quality	99.83	AAI-based (high-confidence)	0	Salmonella	NONE	226_0	Clustered
vOTU_01211	2	54121	54119	Medium-quality	Genome-fragment	88.81	AAI-based (high-confidence)	7.97	None predicted	NONE	2157_0	Clustered
vOTU_01212	34901	71767	36866	Medium-quality	Genome-fragment	73.14	AAI-based (high-confidence)	15.08	Anaerostipes	NONE	2035_0	Clustered
vOTU_01213	2675	48624	45949	High-quality	High-quality	99.82	AAI-based (medium-confidence)	9.8	Blautia	NONE	2057_0	Clustered
vOTU_01214	117281	154622	37341	High-quality	High-quality	100	AAI-based (high-confidence)	0	Flavonifractor	YES	0	Outlier
vOTU_01215	51424	88449	37025	High-quality	High-quality	91	AAI-based (medium-confidence)	0	Slackia	NONE	2216_0	Clustered
vOTU_01216	42710	94910	52200	High-quality	High-quality	90.37	AAI-based (high-confidence)	12.25	Prevotella	NONE	2121_0	Clustered
vOTU_01217	0	112556	112556	Low-quality	Genome-fragment	42.8	AAI-based (high-confidence)	0	None predicted	YES	814_1	Clustered
vOTU_01218	1	17721	17720	High-quality	High-quality	98.64	AAI-based (high-confidence)	0	Bifidobacterium	YES	1793_0	Clustered
vOTU_01219	299522	332851	33329	Low-quality	Genome-fragment	36.57	HMM-based (lower-bound)	26.5	Akkermansia	NONE	2079_0	Clustered
vOTU_01220	1	5809	5808	Complete	High-quality	100	DTR (high-confidence)	0	Bacteroides	NONE	1632_0	Clustered
vOTU_01221	1	39892	39891	Medium-quality	Genome-fragment	76.54	AAI-based (medium-confidence)	0	None predicted	NONE	2012_0	Clustered
vOTU_01222	52884	109521	56637	High-quality	High-quality	97.03	AAI-based (high-confidence)	0	Bacteroides	YES	1868_0	Clustered
vOTU_01223	1	7291	7290	Low-quality	Genome-fragment	10.24	HMM-based (lower-bound)	0	None predicted	NONE	0	Outlier
vOTU_01224	1	28114	28113	Medium-quality	Genome-fragment	65.73	AAI-based (high-confidence)	0	Flavonifractor	YES	0	Outlier
vOTU_01225	105419	137010	31591	Medium-quality	Genome-fragment	55.44	AAI-based (high-confidence)	0	Salmonella	YES	45_0	Clustered
vOTU_01226	1	86378	86377	Complete	High-quality	100	DTR (high-confidence)	0	None predicted	YES	1810_0	Clustered
vOTU_01227	1	10640	10639	Low-quality	Genome-fragment	29.16	AAI-based (high-confidence)	0	None predicted	NONE	0	Outlier
vOTU_01228	1	18097	18096	Low-quality	Genome-fragment	39.78	AAI-based (high-confidence)	0	None predicted	NONE	0	Outlier
vOTU_01229	1	61979	61978	Complete	High-quality	100	DTR (high-confidence)	0	Bifidobacterium	YES	1803_0	Clustered
vOTU_01231	1	27124	27123	Medium-quality	Genome-fragment	67.65	AAI-based (high-confidence)	0	Bifidobacterium	YES	0	Overlap (VC_1172/VC_1690)
vOTU_01232	1	30744	30743	Medium-quality	Genome-fragment	81	AAI-based (high-confidence)	0	Bifidobacterium	NONE	0	Overlap (VC_1166/VC_1692)
vOTU_01233	110032	130072	20040	Medium-quality	Genome-fragment	50.05	AAI-based (high-confidence)	0	Enterocloster	NONE	704_0	Clustered
vOTU_01234	11305	48378	37073	Medium-quality	Genome-fragment	57.61	AAI-based (medium-confidence)	0	None predicted	NONE	2070_0	Clustered
vOTU_01235	54812	128292	73480	High-quality	High-quality	100	AAI-based (high-confidence)	11.88	Bacteroides	YES	1818_2	Clustered
vOTU_01236	104710	145604	40894	High-quality	High-quality	99.47	AAI-based (medium-confidence)	0	Phascolarctobacterium	NONE	1854_0	Clustered
vOTU_01237	1	52880	52879	Medium-quality	Genome-fragment	87.12	AAI-based (high-confidence)	0	None predicted	NONE	1335_0	Clustered
vOTU_01238	1	20502	20501	Low-quality	Genome-fragment	49.77	AAI-based (high-confidence)	0	Bifidobacterium	YES	1689_0	Clustered
vOTU_01239	31254	86144	54890	Medium-quality	Genome-fragment	59.16	AAI-based (high-confidence)	29.53	Bacteroides	YES	0	Overlap (VC_1834/VC_1835)
vOTU_01240	1	67541	67540	High-quality	High-quality	100	AAI-based (high-confidence)	0	Prevotella	YES	2087_0	Clustered
vOTU_01241	1	46198	46197	Medium-quality	Genome-fragment	85.45	AAI-based (high-confidence)	13.11	None predicted	YES	935_0	Clustered
vOTU_01242	33325	75995	42670	High-quality	High-quality	96.98	AAI-based (high-confidence)	0	Veillonella	YES	874_0	Clustered
vOTU_01244	61905	105501	43596	Medium-quality	Genome-fragment	76.98	AAI-based (high-confidence)	0	Bacteroides	NONE	2134_0	Clustered
vOTU_01245	290386	307378	16992	Low-quality	Genome-fragment	31.41	AAI-based (high-confidence)	0	Escherichia	YES	0	Overlap (VC_53/VC_59)
vOTU_01246	1	26001	26000	Medium-quality	Genome-fragment	64.85	AAI-based (medium-confidence)	0	None predicted	YES	1009_0	Clustered
vOTU_01247	1	59639	59638	Medium-quality	Genome-fragment	59.07	AAI-based (medium-confidence)	33.84	Clostridium	YES	0	Outlier
vOTU_01248	10028	93822	83794	High-quality	High-quality	100	AAI-based (high-confidence)	0	None predicted	YES	1507_1	Clustered
vOTU_01250	101192	154495	53303	High-quality	High-quality	94.12	AAI-based (high-confidence)	0	Bacteroides	YES	2134_0	Clustered
vOTU_01251	1	27210	27209	Medium-quality	Genome-fragment	69.62	AAI-based (medium-confidence)	0	Clostridium	YES	580_0	Clustered
vOTU_01252	1	43321	43320	High-quality	High-quality	96.41	AAI-based (high-confidence)	0	Anaerostipes	YES	1870_0	Clustered
vOTU_01253	1	83685	83684	Medium-quality	Genome-fragment	75.05	AAI-based (high-confidence)	0	None predicted	NONE	1835_5	Clustered
vOTU_01254	241	35940	35699	Medium-quality	Genome-fragment	61.17	AAI-based (high-confidence)	0	None predicted	YES	715_0	Clustered
vOTU_01256	1	13793	13792	Low-quality	Genome-fragment	35.74	AAI-based (high-confidence)	0	Ruminococcus	YES	0	Outlier
vOTU_01257	1	25281	25280	Medium-quality	Genome-fragment	56.42	AAI-based (high-confidence)	0	Butyricicoccus	YES	844_0	Clustered
vOTU_01258	11918	96713	84795	Complete	High-quality	100	Provirus (high-confidence)	25.03	None predicted	NONE	1448_4	Clustered
vOTU_01259	26909	71419	44510	High-quality	High-quality	90.24	AAI-based (high-confidence)	21.75	Lachnospira	YES	1778_0	Clustered
vOTU_01260	52	58898	58846	High-quality	High-quality	91.34	AAI-based (high-confidence)	0	Parabacteroides	YES	0	Outlier
vOTU_01261	1	35909	35908	High-quality	High-quality	100	AAI-based (high-confidence)	0	Collinsella	YES	2169_0	Clustered
vOTU_01262	1	33861	33860	Medium-quality	Genome-fragment	74.05	AAI-based (high-confidence)	0	Salmonella	YES	44_0	Clustered
vOTU_01263	1	32145	32144	Medium-quality	Genome-fragment	81.9	AAI-based (high-confidence)	0	Bifidobacterium	YES	1689_0	Clustered
vOTU_01264	1	19253	19252	Medium-quality	Genome-fragment	52.1	AAI-based (medium-confidence)	0	Butyricicoccus	NONE	1898_0	Clustered
vOTU_01265	677	57708	57031	High-quality	High-quality	99.94	AAI-based (high-confidence)	21.39	Anaerostipes	NONE	1870_0	Clustered
vOTU_01266	1	40096	40095	High-quality	High-quality	93.86	AAI-based (medium-confidence)	0	Lactobacillus	YES	0	Outlier
vOTU_01267	132	36253	36121	High-quality	High-quality	90.81	AAI-based (high-confidence)	0	Veillonella	NONE	1849_0	Clustered
vOTU_01268	1	41774	41773	Medium-quality	Genome-fragment	50.3	AAI-based (medium-confidence)	24.75	Megamonas	YES	1299_0	Clustered
vOTU_01269	1	29250	29249	Medium-quality	Genome-fragment	71.79	AAI-based (high-confidence)	0	Blautia	YES	1508_0	Clustered
vOTU_01270	1	62799	62798	Complete	High-quality	100	DTR (high-confidence)	0	None predicted	YES	1505_0	Clustered
vOTU_01271	11066	89340	78274	High-quality	High-quality	100	AAI-based (high-confidence)	0	Roseburia	YES	2135_0	Clustered
vOTU_01272	1	16105	16104	High-quality	High-quality	94.56	AAI-based (medium-confidence)	0	None predicted	YES	2186_0	Clustered
vOTU_01273	1	33135	33134	Low-quality	Genome-fragment	19.5	AAI-based (high-confidence)	0	Fusicatenibacter	NONE	0	Outlier
vOTU_01274	145	39297	39152	Medium-quality	Genome-fragment	80.67	AAI-based (high-confidence)	21.99	Anaerostipes	NONE	1958_0	Clustered
vOTU_01275	1	21060	21059	Low-quality	Genome-fragment	25.58	AAI-based (high-confidence)	0	None predicted	NONE	0	Overlap (VC_1956/VC_2095)
vOTU_01276	1	15505	15504	Medium-quality	Genome-fragment	51.64	HMM-based (lower-bound)	0	Clostridium	YES	2062_0	Clustered
vOTU_01277	51350	104559	53209	Medium-quality	Genome-fragment	74.99	AAI-based (high-confidence)	31.79	Bacteroides	NONE	1819_0	Clustered
vOTU_01278	72995	128882	55887	High-quality	High-quality	94.35	AAI-based (high-confidence)	0	Faecalibacterium	NONE	1337_0	Clustered
vOTU_01279	1	55049	55048	High-quality	High-quality	100	AAI-based (high-confidence)	0	None predicted	YES	1547_0	Clustered
vOTU_01280	1	40588	40587	Medium-quality	Genome-fragment	87.09	AAI-based (high-confidence)	16.8	Bifidobacterium	YES	1093_0	Clustered
vOTU_01281	5644	93398	87754	High-quality	High-quality	100	AAI-based (medium-confidence)	17.92	Faecalibacterium	NONE	1539_0	Clustered
vOTU_01282	95601	133764	38163	High-quality	High-quality	100	AAI-based (high-confidence)	0	Collinsella	YES	1785_0	Clustered
vOTU_01283	1	33870	33869	Medium-quality	Genome-fragment	87.21	AAI-based (high-confidence)	0	Bifidobacterium	YES	1093_0	Clustered
vOTU_01284	8336	53736	45400	High-quality	High-quality	99.43	AAI-based (high-confidence)	15	Veillonella	YES	1852_0	Clustered
vOTU_01285	47709	89187	41478	High-quality	High-quality	90.87	AAI-based (high-confidence)	0	Salmonella	YES	44_0	Clustered
vOTU_01286	1	38095	38094	Medium-quality	Genome-fragment	85.27	AAI-based (high-confidence)	9.27	None predicted	NONE	676_0	Clustered
vOTU_01289	1	33921	33920	Medium-quality	Genome-fragment	87.59	AAI-based (medium-confidence)	0	Bifidobacterium	YES	0	Outlier
vOTU_01290	1	32918	32917	Medium-quality	Genome-fragment	64.69	HMM-based (lower-bound)	0	None predicted	YES	1535_0	Clustered
vOTU_01291	18488	56854	38366	High-quality	High-quality	94.08	AAI-based (high-confidence)	0	Dialister	NONE	0	Overlap (VC_1851/VC_1852)
vOTU_01293	1	39557	39556	High-quality	High-quality	100	AAI-based (high-confidence)	0	Flavonifractor	YES	1895_0	Clustered
vOTU_01294	209	33032	32823	Medium-quality	Genome-fragment	86.85	AAI-based (high-confidence)	0	Bifidobacterium	YES	1801_0	Clustered
vOTU_01295	15002	49669	34667	High-quality	High-quality	91.56	AAI-based (high-confidence)	0	Bifidobacterium	YES	1801_0	Clustered
vOTU_01296	1	25415	25414	Low-quality	Genome-fragment	47.05	AAI-based (medium-confidence)	22.04	None predicted	NONE	0	Overlap (VC_52/VC_2115/VC_2225)
vOTU_01297	1	43311	43310	Medium-quality	Genome-fragment	87.66	AAI-based (high-confidence)	0	None predicted	YES	1968_2	Clustered
vOTU_01298	1	34393	34392	High-quality	High-quality	100	AAI-based (high-confidence)	0	Haemophilus	NONE	0	Overlap (VC_254/VC_331)
vOTU_01299	1	14413	14412	Low-quality	Genome-fragment	42.63	HMM-based (lower-bound)	0	None predicted	NONE	2184_0	Clustered
vOTU_01300	43255	90797	47542	Medium-quality	Genome-fragment	81.85	AAI-based (high-confidence)	23.97	Salmonella	YES	30_0	Clustered
vOTU_01302	1	17622	17621	Low-quality	Genome-fragment	38.87	AAI-based (high-confidence)	0	Salmonella	NONE	38_0	Clustered
vOTU_01303	1	40170	40169	High-quality	High-quality	98.62	AAI-based (high-confidence)	0	Ruminococcus	NONE	1904_0	Clustered
vOTU_01304	1	38007	38006	Medium-quality	Genome-fragment	62.78	AAI-based (high-confidence)	0	None predicted	NONE	1504_1	Clustered
vOTU_01306	1	8980	8979	Low-quality	Genome-fragment	26.21	AAI-based (medium-confidence)	0	Haemophilus	YES	5_0	Clustered
vOTU_01307	1	4951	4950	Low-quality	Genome-fragment	3.72	AAI-based (medium-confidence)	0	None predicted	YES	1984_0	Clustered
vOTU_01308	1	19782	19781	Low-quality	Genome-fragment	43.88	AAI-based (high-confidence)	0	Anaerostipes	NONE	0	Outlier
vOTU_01309	68954	109566	40612	High-quality	High-quality	97.84	AAI-based (high-confidence)	0	Blautia	NONE	2057_0	Clustered
vOTU_01310	1	85108	85107	High-quality	High-quality	97.32	AAI-based (high-confidence)	0	Bacteroides	YES	1811_0	Clustered
vOTU_01311	18306	65435	47129	Medium-quality	Genome-fragment	89.74	AAI-based (high-confidence)	10.71	None predicted	YES	933_0	Clustered
vOTU_01313	4963	36740	31777	Medium-quality	Genome-fragment	51.93	AAI-based (high-confidence)	0	Bacteroides	YES	0	Overlap (VC_1260/VC_1977)
vOTU_01314	182656	220446	37790	High-quality	High-quality	92.62	AAI-based (medium-confidence)	0	Dialister	YES	2022_0	Clustered
vOTU_01315	76702	137403	60701	High-quality	High-quality	92.37	AAI-based (medium-confidence)	5.17	Bifidobacterium	NONE	0	Overlap (VC_1801/VC_1803)
vOTU_01316	1	31241	31240	Medium-quality	Genome-fragment	70.34	AAI-based (high-confidence)	0	Clostridium	YES	1870_0	Clustered
vOTU_01317	1	55665	55664	Medium-quality	Genome-fragment	70.19	AAI-based (high-confidence)	18.3	Parabacteroides	YES	0	Outlier
vOTU_01318	266	71093	70827	High-quality	High-quality	100	AAI-based (high-confidence)	0	Bacteroides	YES	1915_1	Clustered
vOTU_01319	13088	82222	69134	Complete	High-quality	100	Provirus (high-confidence)	10.56	None predicted	NONE	1975_2	Clustered
vOTU_01320	1	45887	45886	Medium-quality	Genome-fragment	82.46	AAI-based (high-confidence)	12.03	None predicted	NONE	1572_0	Clustered
vOTU_01321	1	46381	46380	Medium-quality	Genome-fragment	76.41	AAI-based (high-confidence)	0	None predicted	YES	1335_0	Clustered
vOTU_01322	1	31918	31917	Low-quality	Genome-fragment	38.85	HMM-based (lower-bound)	0	None predicted	NONE	0	Singleton
vOTU_01323	1	47998	47997	High-quality	High-quality	100	AAI-based (medium-confidence)	2.02	None predicted	YES	1256_0	Clustered
vOTU_01324	59387	134395	75008	High-quality	High-quality	100	AAI-based (high-confidence)	0	Ruminococcus	NONE	1448_5	Clustered
vOTU_01325	1	35882	35881	Medium-quality	Genome-fragment	84.87	AAI-based (high-confidence)	0	Ruminococcus	NONE	1888_0	Clustered
vOTU_01326	16020	142973	126953	High-quality	High-quality	100	AAI-based (high-confidence)	2.19	None predicted	NONE	1448_1	Clustered/Singleton
vOTU_01327	1	52076	52075	High-quality	High-quality	100	AAI-based (high-confidence)	0	Bacteroides	YES	1916_0	Clustered
vOTU_01328	1	21229	21228	Low-quality	Genome-fragment	45.35	AAI-based (high-confidence)	0	Blautia	YES	1575_0	Clustered
vOTU_01329	1266	30398	29132	Medium-quality	Genome-fragment	77.51	AAI-based (medium-confidence)	0	Tyzzerella	YES	668_0	Clustered
vOTU_01330	1	33976	33975	High-quality	High-quality	95.71	AAI-based (medium-confidence)	0	Dialister	YES	2214_0	Clustered
vOTU_01331	13240	61761	48521	Complete	High-quality	100	Provirus (medium-confidence)	23.94	None predicted	NONE	670_0	Clustered
vOTU_01332	1	44221	44220	Medium-quality	Genome-fragment	70.32	AAI-based (high-confidence)	39.64	Bifidobacterium	NONE	1165_0	Clustered
vOTU_01333	1	19509	19508	Medium-quality	Genome-fragment	52.05	AAI-based (high-confidence)	0	Blautia	YES	1525_0	Clustered
vOTU_01334	1	25197	25196	Medium-quality	Genome-fragment	60.59	AAI-based (high-confidence)	0	Coprococcus	YES	0	Overlap (VC_1482/VC_2116)
vOTU_01335	1	37612	37611	Medium-quality	Genome-fragment	82.68	AAI-based (medium-confidence)	0	Megamonas	NONE	1856_0	Clustered
vOTU_01336	18861	46112	27251	Low-quality	Genome-fragment	23.45	HMM-based (lower-bound)	24.51	None predicted	YES	1139_0	Clustered
vOTU_01338	1	85136	85135	Medium-quality	Genome-fragment	63.88	AAI-based (medium-confidence)	0	None predicted	YES	0	Outlier
vOTU_01339	1	138245	138244	Medium-quality	Genome-fragment	79.55	AAI-based (high-confidence)	0	None predicted	NONE	0	Outlier
vOTU_01340	1	44292	44291	High-quality	High-quality	98.16	AAI-based (high-confidence)	0	Odoribacter	YES	1026_0	Clustered
vOTU_01341	1	39326	39325	High-quality	High-quality	95.17	AAI-based (high-confidence)	0	Enterococcus	YES	275_0	Clustered
vOTU_01342	15869	51695	35826	Medium-quality	Genome-fragment	88.28	AAI-based (high-confidence)	0	Bifidobacterium	NONE	1164_0	Clustered
vOTU_01344	1	37062	37061	High-quality	High-quality	100	AAI-based (medium-confidence)	0	Enterocloster	NONE	0	Overlap (VC_2136/VC_2137)
vOTU_01345	1	40512	40511	High-quality	High-quality	93.72	AAI-based (high-confidence)	0	Veillonella	NONE	1847_0	Clustered
vOTU_01346	1	31886	31885	Medium-quality	Genome-fragment	76.79	AAI-based (high-confidence)	0	Blautia	YES	2057_0	Clustered
vOTU_01347	1	61672	61671	High-quality	High-quality	100	AAI-based (high-confidence)	9.64	None predicted	YES	1977_1	Clustered
vOTU_01348	10503	42184	31681	Medium-quality	Genome-fragment	75.01	AAI-based (high-confidence)	0	Salmonella	YES	0	Overlap (VC_38/VC_291)
vOTU_01349	1	55971	55970	High-quality	High-quality	93.34	AAI-based (high-confidence)	0	Roseburia	NONE	1526_8	Clustered/Singleton
vOTU_01350	466	72514	72048	High-quality	High-quality	98.8	AAI-based (high-confidence)	15.33	Mediterraneibacter	NONE	0	Overlap (VC_1527/VC_2196)
vOTU_01351	16248	72203	55955	High-quality	High-quality	93.07	AAI-based (medium-confidence)	34.58	Veillonella	NONE	1864_0	Clustered
vOTU_01352	1	150463	150462	Complete	High-quality	100	DTR (high-confidence)	0	Parabacteroides	YES	949_2	Clustered
vOTU_01353	1	29261	29260	Medium-quality	Genome-fragment	63.14	AAI-based (high-confidence)	0	Bacteroides	YES	0	Outlier
vOTU_01354	1	38472	38471	Medium-quality	Genome-fragment	80.98	AAI-based (high-confidence)	3.13	Salmonella	YES	0	Overlap (VC_58/VC_59)
vOTU_01355	209911	284049	74138	Complete	High-quality	100	Provirus (high-confidence)	16.73	Bacteroides	YES	1818_2	Clustered
vOTU_01356	1	34637	34636	Medium-quality	Genome-fragment	68.68	AAI-based (high-confidence)	0	Salmonella	YES	0	Outlier
vOTU_01357	34673	51141	16468	Low-quality	Genome-fragment	48.12	AAI-based (high-confidence)	0	None predicted	NONE	1777_0	Clustered
vOTU_01358	5530	39966	34436	Medium-quality	Genome-fragment	53.41	AAI-based (high-confidence)	0	Bacteroides	YES	0	Overlap (VC_1833/VC_1834)
vOTU_01359	1	45388	45387	High-quality	High-quality	100	AAI-based (high-confidence)	0	Blautia	YES	2056_0	Clustered
vOTU_01360	1	26965	26964	Medium-quality	Genome-fragment	77.11	AAI-based (high-confidence)	0	Faecalibacterium	YES	1582_0	Clustered
vOTU_01361	1	11286	11285	Low-quality	Genome-fragment	21.89	AAI-based (high-confidence)	0	None predicted	YES	0	Overlap (VC_2157/VC_2159)
vOTU_01362	71417	122599	51182	High-quality	High-quality	100	AAI-based (high-confidence)	0	Bacteroides	YES	1819_0	Clustered
vOTU_01363	1	47837	47836	High-quality	High-quality	94.77	AAI-based (high-confidence)	0	Clostridioides	YES	714_0	Clustered/Singleton
vOTU_01364	1	20341	20340	Medium-quality	Genome-fragment	53.15	AAI-based (high-confidence)	0	Bifidobacterium	YES	0	Outlier
vOTU_01366	128411	194265	65854	High-quality	High-quality	93.09	AAI-based (high-confidence)	0	Bacteroides	YES	1915_1	Clustered
vOTU_01367	19119	39985	20866	Low-quality	Genome-fragment	37.69	AAI-based (high-confidence)	0	Dickeya	NONE	0	Outlier
vOTU_01368	11002	163017	152015	High-quality	High-quality	100	AAI-based (medium-confidence)	0.83	Clostridium	NONE	2272_0	Clustered
vOTU_01370	1	42596	42595	High-quality	High-quality	95.57	AAI-based (high-confidence)	0	Escherichia	YES	0	Overlap (VC_47/VC_62/VC_1142)
vOTU_01371	1	41721	41720	Complete	High-quality	100	DTR (high-confidence)	0	Akkermansia	NONE	2150_0	Clustered
vOTU_01372	23326	83820	60494	Medium-quality	Genome-fragment	84.68	AAI-based (high-confidence)	5.04	Bacteroides	YES	0	Outlier
vOTU_01373	1	10810	10809	Low-quality	Genome-fragment	12.39	AAI-based (high-confidence)	0	Akkermansia	NONE	0	Outlier
vOTU_01374	1	58844	58843	Medium-quality	Genome-fragment	70.44	AAI-based (high-confidence)	0	None predicted	NONE	1507_1	Clustered
vOTU_01375	1	88823	88822	High-quality	High-quality	98.75	AAI-based (high-confidence)	0	Escherichia	YES	335_0	Clustered
vOTU_01376	1	57243	57242	High-quality	High-quality	98.06	AAI-based (high-confidence)	0	Bacteroides	YES	1868_0	Clustered
vOTU_01377	1	39138	39137	Medium-quality	Genome-fragment	83.04	AAI-based (high-confidence)	19.44	Lachnospira	NONE	0	Overlap (VC_1779/VC_1938)
vOTU_01378	9810	57025	47215	Medium-quality	Genome-fragment	60.34	HMM-based (lower-bound)	0	None predicted	YES	1768_0	Clustered
vOTU_01379	1	42559	42558	High-quality	High-quality	94.94	AAI-based (medium-confidence)	0	Enterocloster	NONE	156_0	Clustered
vOTU_01380	3781	66208	62427	High-quality	High-quality	100	AAI-based (high-confidence)	0	None predicted	NONE	2008_0	Clustered/Singleton
vOTU_01381	1	16778	16777	Medium-quality	Genome-fragment	89.98	AAI-based (medium-confidence)	0	Lachnoclostridium	YES	1892_0	Clustered
vOTU_01382	104163	122494	18331	Low-quality	Genome-fragment	24.64	AAI-based (high-confidence)	0	None predicted	NONE	2128_0	Clustered
vOTU_01383	1	61928	61927	High-quality	High-quality	100	AAI-based (high-confidence)	0	None predicted	NONE	1578_1	Clustered
vOTU_01384	29210	58809	29599	Low-quality	Genome-fragment	36.21	AAI-based (high-confidence)	42.36	None predicted	NONE	0	Overlap (VC_936/VC_1345)
vOTU_01385	1	5724	5723	Complete	High-quality	100	DTR (high-confidence)	0	None predicted	YES	1416_0	Clustered
vOTU_01386	1	17400	17399	Complete	High-quality	100	ITR (high-confidence)	0	Eggerthella	YES	783_0	Clustered
vOTU_01387	236	52848	52612	High-quality	High-quality	100	AAI-based (high-confidence)	0	Prevotella	YES	1961_0	Clustered
vOTU_01388	98115	127544	29429	Low-quality	Genome-fragment	31.08	AAI-based (high-confidence)	38.23	Bacteroides	YES	0	Outlier
vOTU_01389	1	15674	15673	Complete	High-quality	100	ITR (medium-confidence)	0	None predicted	NONE	0	Overlap (VC_1891/VC_1892/VC_1894)
vOTU_01392	1	40185	40184	Complete	High-quality	100	DTR (high-confidence)	0	None predicted	NONE	0	Overlap (VC_1870/VC_1939)
vOTU_01393	1	42253	42252	Medium-quality	Genome-fragment	57.56	AAI-based (high-confidence)	0	None predicted	NONE	0	Outlier
vOTU_01394	45255	76922	31667	High-quality	High-quality	100	AAI-based (high-confidence)	0	Salmonella	NONE	226_0	Clustered
vOTU_01395	1	37916	37915	Low-quality	Genome-fragment	43.92	AAI-based (medium-confidence)	43.93	Bacteroides	YES	1819_0	Clustered
vOTU_01396	31	34523	34492	Medium-quality	Genome-fragment	74.58	AAI-based (high-confidence)	0	Salmonella	NONE	0	Overlap (VC_53/VC_59)
vOTU_01397	1	40009	40008	Medium-quality	Genome-fragment	88.94	AAI-based (high-confidence)	0	Prevotella	NONE	1026_0	Clustered
vOTU_01398	1	18517	18516	Low-quality	Genome-fragment	38.71	AAI-based (medium-confidence)	22.93	Clostridium	YES	582_0	Clustered
vOTU_01399	24289	93762	69473	High-quality	High-quality	97.9	AAI-based (high-confidence)	10.35	Parabacteroides	NONE	0	Overlap (VC_1877/VC_1879/VC_1880)
vOTU_01400	1	34191	34190	Complete	High-quality	100	DTR (high-confidence)	0	Veillonella	NONE	1941_0	Clustered
vOTU_01401	1	170250	170249	Low-quality	Genome-fragment	44.82	HMM-based (lower-bound)	0	None predicted	YES	2244_1	Clustered/Singleton
vOTU_01403	1	45625	45624	High-quality	High-quality	100	AAI-based (high-confidence)	0	Bacteroides	YES	0	Overlap (VC_1808/VC_1878/VC_1883)
vOTU_01404	1	18032	18031	Low-quality	Genome-fragment	36.08	AAI-based (high-confidence)	0	Salmonella	YES	0	Outlier
vOTU_01405	1	42811	42810	High-quality	High-quality	96.13	AAI-based (high-confidence)	0	Anaerostipes	NONE	1922_0	Clustered
vOTU_01406	65635	116742	51107	Medium-quality	Genome-fragment	71.28	AAI-based (high-confidence)	4.72	None predicted	NONE	935_1	Clustered
vOTU_01407	1	35903	35902	High-quality	High-quality	97.56	AAI-based (high-confidence)	0	None predicted	YES	0	Overlap (VC_678/VC_1856/VC_1952)
vOTU_01408	1	42959	42958	High-quality	High-quality	100	AAI-based (high-confidence)	0	Lactobacillus	NONE	0	Outlier
vOTU_01409	92757	138853	46096	High-quality	High-quality	100	AAI-based (high-confidence)	9.92	Bifidobacterium	YES	1689_0	Clustered
vOTU_01411	1	22096	22095	Low-quality	Genome-fragment	36.32	AAI-based (high-confidence)	0	Clostridiales	YES	0	Outlier
vOTU_01412	1	39615	39614	High-quality	High-quality	100	AAI-based (high-confidence)	0	Lawsonibacter	YES	1569_1	Clustered
vOTU_01413	28627	93199	64572	Medium-quality	Genome-fragment	81.67	AAI-based (medium-confidence)	5.22	None predicted	YES	1446_1	Clustered/Singleton
vOTU_01415	1461	103738	102277	High-quality	High-quality	100	AAI-based (high-confidence)	0	Bacteroides	NONE	1917_4	Clustered/Singleton
vOTU_01416	71783	104749	32966	Medium-quality	Genome-fragment	78.7	AAI-based (medium-confidence)	0	Ruminococcus	YES	1950_0	Clustered
vOTU_01417	892	50267	49375	Medium-quality	Genome-fragment	53.32	HMM-based (lower-bound)	41.85	Ruminococcus	NONE	1950_0	Clustered
vOTU_01418	1	61189	61188	High-quality	High-quality	100	AAI-based (high-confidence)	0	Eubacterium	YES	0	Overlap (VC_1527/VC_2194)
vOTU_01419	1	20892	20891	Medium-quality	Genome-fragment	52.73	AAI-based (medium-confidence)	0	None predicted	YES	0	Overlap (VC_878/VC_1133)
vOTU_01420	87	36660	36573	High-quality	High-quality	100	AAI-based (high-confidence)	0	Megasphaera	NONE	1581_0	Clustered
vOTU_01421	1	18130	18129	Complete	High-quality	100	DTR (high-confidence)	0	Bifidobacterium	YES	0	Overlap (VC_2097/VC_2098/VC_2210)
vOTU_01423	1	32449	32448	Medium-quality	Genome-fragment	81.3	AAI-based (high-confidence)	0	Bifidobacterium	YES	1883_0	Clustered
vOTU_01424	18466	45780	27314	Medium-quality	Genome-fragment	64.6	AAI-based (high-confidence)	0	None predicted	NONE	2006_0	Clustered
vOTU_01425	1	33916	33915	High-quality	High-quality	99.36	AAI-based (high-confidence)	0	Veillonella	YES	1941_0	Clustered
vOTU_01426	1	56166	56165	High-quality	High-quality	92.13	AAI-based (high-confidence)	7.11	Bacteroides	YES	2134_0	Clustered
vOTU_01427	216907	251154	34247	Medium-quality	Genome-fragment	88.08	AAI-based (medium-confidence)	5.7	Erysipelatoclostridium	NONE	1149_1	Clustered
vOTU_01428	2208	82237	80029	Complete	High-quality	100	Provirus (medium-confidence)	35.15	Bacteroides	YES	1868_0	Clustered
vOTU_01429	1	35554	35553	Medium-quality	Genome-fragment	83.01	AAI-based (high-confidence)	0	Veillonella	NONE	1853_0	Clustered
vOTU_01430	1	36699	36698	High-quality	High-quality	93.12	AAI-based (medium-confidence)	0	Pseudoflavonifractor	YES	669_0	Clustered
vOTU_01431	129812	226403	96591	Medium-quality	Genome-fragment	65.56	AAI-based (high-confidence)	58.95	None predicted	YES	935_2	Clustered
vOTU_01432	12326	45335	33009	High-quality	High-quality	93.81	AAI-based (high-confidence)	0	Faecalibacterium	YES	1583_0	Clustered
vOTU_01433	31112	69372	38260	Medium-quality	Genome-fragment	88.5	AAI-based (high-confidence)	0	Veillonella	YES	1847_0	Clustered
vOTU_01434	2462	63784	61322	High-quality	High-quality	93.1	AAI-based (high-confidence)	11.6	None predicted	NONE	1846_0	Clustered
vOTU_01435	10222	65285	55063	High-quality	High-quality	95.32	AAI-based (high-confidence)	22.66	Anaerostipes	YES	1870_0	Clustered
vOTU_01436	10060	62526	52466	Medium-quality	Genome-fragment	77.83	AAI-based (high-confidence)	28.76	Acidaminococcus	YES	0	Overlap (VC_936/VC_1345)
vOTU_01437	1	40043	40042	High-quality	High-quality	96.48	AAI-based (high-confidence)	0	Blautia	NONE	2057_0	Clustered
vOTU_01438	38032	70070	32038	Low-quality	Genome-fragment	49.2	AAI-based (medium-confidence)	0	Bacteroides	NONE	1944_0	Clustered
vOTU_01439	75017	254006	178989	High-quality	High-quality	98.81	HMM-based (lower-bound)	0	Clostridium	NONE	2272_0	Clustered
vOTU_01440	1	27134	27133	Low-quality	Genome-fragment	47.95	AAI-based (high-confidence)	0	None predicted	YES	2157_0	Clustered
vOTU_01441	177184	245324	68140	High-quality	High-quality	98.39	AAI-based (medium-confidence)	0	Parabacteroides	YES	2051_0	Clustered
vOTU_01442	1	33722	33721	Complete	High-quality	100	DTR (high-confidence)	0	None predicted	YES	2170_0	Clustered
vOTU_01443	60003	96649	36646	High-quality	High-quality	93.93	AAI-based (high-confidence)	0	Blautia	NONE	0	Overlap (VC_1844/VC_1845)
vOTU_01444	1	18723	18722	Low-quality	Genome-fragment	37.45	AAI-based (medium-confidence)	0	None predicted	NONE	0	Outlier
vOTU_01445	1	15621	15620	Medium-quality	Genome-fragment	52.02	HMM-based (lower-bound)	0	Clostridium	YES	2062_0	Clustered
vOTU_01446	1	118762	118761	High-quality	High-quality	100	AAI-based (high-confidence)	0	Eggerthella	YES	2253_0	Clustered
vOTU_01447	1	16817	16816	Medium-quality	Genome-fragment	88.89	AAI-based (medium-confidence)	0	Lachnoclostridium	YES	1892_0	Clustered
vOTU_01448	1	42836	42835	High-quality	High-quality	95.1	AAI-based (high-confidence)	0	Intestinibacter	NONE	0	Overlap (VC_1012/VC_1829)
vOTU_01449	1276	57895	56619	High-quality	High-quality	96.92	AAI-based (high-confidence)	26.36	Tyzzerella	YES	2115_0	Clustered
vOTU_01450	1	47319	47318	High-quality	High-quality	100	AAI-based (high-confidence)	0	None predicted	YES	716_1	Clustered
vOTU_01451	24435	58113	33678	High-quality	High-quality	98.83	AAI-based (high-confidence)	0	Veillonella	YES	1941_0	Clustered
vOTU_01452	20163	55813	35650	Medium-quality	Genome-fragment	79.05	AAI-based (high-confidence)	0	Enterocloster	NONE	0	Overlap (VC_1333/VC_2130)
vOTU_01453	1	35141	35140	Medium-quality	Genome-fragment	81.27	AAI-based (high-confidence)	0	Veillonella	NONE	1847_0	Clustered
vOTU_01454	1	24789	24788	Medium-quality	Genome-fragment	53.54	AAI-based (high-confidence)	0	Citrobacter	NONE	0	Overlap (VC_53/VC_59)
vOTU_01456	64593	223288	158695	High-quality	High-quality	99.9	AAI-based (high-confidence)	0	Anaerostipes	NONE	1927_0	Clustered
vOTU_01457	24112	65527	41415	High-quality	High-quality	95.09	AAI-based (high-confidence)	11.54	Roseburia	NONE	1839_0	Clustered
vOTU_01458	1	28441	28440	Medium-quality	Genome-fragment	75.32	AAI-based (medium-confidence)	0	Bilophila	YES	0	Outlier
vOTU_01459	1	37747	37746	Medium-quality	Genome-fragment	89.63	AAI-based (high-confidence)	0	Faecalibacterium	NONE	1786_0	Clustered
vOTU_01460	1	76149	76148	Medium-quality	Genome-fragment	87.75	AAI-based (high-confidence)	0	None predicted	NONE	1810_0	Clustered
vOTU_01461	1	20981	20980	Medium-quality	Genome-fragment	51.6	AAI-based (high-confidence)	0	None predicted	NONE	0	Outlier
vOTU_01462	1	68243	68242	Medium-quality	Genome-fragment	89.94	AAI-based (high-confidence)	23.07	Bacteroides	NONE	1868_0	Clustered
vOTU_01463	1	18757	18756	Low-quality	Genome-fragment	28.21	HMM-based (lower-bound)	0	Faecalibacterium	YES	0	Outlier
vOTU_01464	35181	59469	24288	Medium-quality	Genome-fragment	51.48	AAI-based (high-confidence)	0	None predicted	YES	0	Outlier
vOTU_01465	124656	152220	27564	Low-quality	Genome-fragment	44.75	AAI-based (high-confidence)	0	Bacteroides	YES	1259_8	Clustered
vOTU_01466	64444	101775	37331	High-quality	High-quality	100	AAI-based (medium-confidence)	0	None predicted	YES	1869_0	Clustered
vOTU_01467	82649	146809	64160	High-quality	High-quality	100	AAI-based (medium-confidence)	5.62	Parabacteroides	NONE	1975_0	Clustered
vOTU_01468	313946	379858	65912	High-quality	High-quality	100	AAI-based (high-confidence)	6.93	Parabacteroides	YES	1876_3	Clustered/Singleton
vOTU_01470	94818	163330	68512	High-quality	High-quality	100	AAI-based (high-confidence)	4.74	Bacteroides	NONE	1818_2	Clustered
vOTU_01471	8549	36494	27945	Medium-quality	Genome-fragment	61.87	AAI-based (medium-confidence)	0	None predicted	NONE	0	Outlier
vOTU_01472	1	9002	9001	Low-quality	Genome-fragment	23.17	AAI-based (high-confidence)	0	None predicted	NONE	0	Outlier
vOTU_01473	1	31561	31560	Medium-quality	Genome-fragment	74.79	AAI-based (high-confidence)	0	Blautia	YES	1017_0	Clustered
vOTU_01475	64732	123635	58903	High-quality	High-quality	95.81	AAI-based (high-confidence)	0	None predicted	YES	0	Outlier
vOTU_01476	2	46047	46045	Medium-quality	Genome-fragment	84.1	AAI-based (medium-confidence)	17.44	Parasutterella	YES	0	Outlier
vOTU_01477	1	16445	16444	Low-quality	Genome-fragment	39.44	AAI-based (medium-confidence)	0	Bacteroides	YES	2052_0	Clustered
vOTU_01478	10893	53782	42889	High-quality	High-quality	95.02	AAI-based (high-confidence)	0	Erysipelatoclostridium	NONE	0	Overlap (VC_1732/VC_1887)
vOTU_01479	1	15743	15742	Medium-quality	Genome-fragment	69.35	AAI-based (medium-confidence)	0	Erysipelatoclostridium	NONE	1830_0	Clustered
vOTU_01480	1	37828	37827	Complete	High-quality	100	DTR (high-confidence)	0	None predicted	NONE	0	Outlier
vOTU_01481	116074	149324	33250	High-quality	High-quality	99.57	AAI-based (high-confidence)	5.3	Salmonella	NONE	226_0	Clustered
vOTU_01482	66857	99282	32425	Medium-quality	Genome-fragment	87.13	AAI-based (high-confidence)	0	Klebsiella	YES	921_0	Clustered
vOTU_01483	131307	159401	28094	Medium-quality	Genome-fragment	54.96	AAI-based (high-confidence)	0	Klebsiella	NONE	0	Overlap (VC_60/VC_66)
vOTU_01484	1	11686	11685	Low-quality	Genome-fragment	22.07	AAI-based (high-confidence)	0	Salmonella	NONE	0	Outlier
vOTU_01485	613	38086	37473	High-quality	High-quality	97.54	AAI-based (high-confidence)	0	Ruminococcus	NONE	1948_0	Clustered
vOTU_01486	77512	115487	37975	High-quality	High-quality	100	AAI-based (high-confidence)	0	Collinsella	NONE	1995_0	Clustered
vOTU_01487	1	35460	35459	Medium-quality	Genome-fragment	86.05	AAI-based (high-confidence)	11.7	None predicted	NONE	1149_1	Clustered
vOTU_01488	1	8285	8284	Medium-quality	Genome-fragment	57.46	AAI-based (medium-confidence)	0	None predicted	NONE	0	Singleton
vOTU_01489	12843	58036	45193	High-quality	High-quality	100	AAI-based (high-confidence)	0	Dialister	NONE	0	Overlap (VC_1851/VC_1852)
vOTU_01490	1	94445	94444	High-quality	High-quality	98.26	AAI-based (high-confidence)	0	None predicted	NONE	1111_0	Clustered
vOTU_01491	1	7642	7641	Medium-quality	Genome-fragment	56.39	AAI-based (high-confidence)	0	None predicted	NONE	0	Outlier
vOTU_01492	2587	136065	133478	High-quality	High-quality	99.95	AAI-based (high-confidence)	0	Faecalibacterium	NONE	1973_0	Clustered
vOTU_01493	1	55179	55178	Complete	High-quality	100	DTR (high-confidence)	0	Faecalibacterium	NONE	1987_1	Clustered
vOTU_01494	11538	55922	44384	High-quality	High-quality	93.94	AAI-based (high-confidence)	0	Escherichia	NONE	#N/A	#N/A
vOTU_01495	1	98368	98367	Complete	High-quality	100	DTR (high-confidence)	0	Porphyromonas	NONE	1102_0	Clustered
vOTU_01496	1	46487	46486	Medium-quality	Genome-fragment	74.75	AAI-based (high-confidence)	0	None predicted	NONE	1447_1	Clustered
vOTU_01497	1	65023	65022	High-quality	High-quality	90.49	AAI-based (medium-confidence)	34.63	Flavonifractor	NONE	1896_0	Clustered
vOTU_01498	790	69491	68701	High-quality	High-quality	92.37	AAI-based (high-confidence)	17.89	Roseburia	NONE	0	Overlap (VC_1337/VC_1448)
vOTU_01499	1	38714	38713	Complete	High-quality	100	DTR (high-confidence)	0	None predicted	YES	1857_0	Clustered
vOTU_01500	1	30380	30379	Medium-quality	Genome-fragment	56.31	AAI-based (high-confidence)	0	Salmonella	YES	45_0	Clustered
vOTU_01501	1	15113	15112	Medium-quality	Genome-fragment	81.04	AAI-based (medium-confidence)	0	Roseburia	NONE	0	Overlap (VC_1892/VC_1894)
vOTU_01502	1	43208	43207	Low-quality	Genome-fragment	41.44	AAI-based (high-confidence)	0	Escherichia	NONE	0	Outlier
vOTU_01503	1	24458	24457	Medium-quality	Genome-fragment	53.92	AAI-based (high-confidence)	0	Bacteroides	NONE	0	Outlier
vOTU_01504	1	114139	114138	Medium-quality	Genome-fragment	89.81	HMM-based (lower-bound)	0	Anaerostipes	YES	2274_0	Clustered
vOTU_01505	81218	126532	45314	High-quality	High-quality	100	AAI-based (high-confidence)	7.68	Roseburia	NONE	1839_0	Clustered
vOTU_01506	1	16598	16597	Low-quality	Genome-fragment	37.07	AAI-based (high-confidence)	0	Anaerostipes	NONE	0	Outlier
vOTU_01507	1	39862	39861	Medium-quality	Genome-fragment	84.6	AAI-based (high-confidence)	0	None predicted	YES	1547_0	Clustered
vOTU_01510	128	44889	44761	High-quality	High-quality	100	AAI-based (high-confidence)	0	Salmonella	YES	0	Overlap (VC_39/VC_250)
vOTU_01511	1	158162	158161	Complete	High-quality	100	ITR (high-confidence)	0	Parabacteroides	YES	949_2	Clustered
vOTU_01512	1	42656	42655	Medium-quality	Genome-fragment	85.79	AAI-based (high-confidence)	15.4	Enterocloster	NONE	676_0	Clustered
vOTU_01513	1	13834	13833	Low-quality	Genome-fragment	26.54	AAI-based (high-confidence)	0	None predicted	NONE	0	Overlap (VC_2157/VC_2159)
vOTU_01514	1	15548	15547	Medium-quality	Genome-fragment	65.56	AAI-based (medium-confidence)	0	Faecalicatena	YES	2200_0	Clustered
vOTU_01515	24432	89317	64885	Complete	High-quality	100	Provirus (high-confidence)	12.76	Intestinimonas	NONE	1595_0	Clustered
vOTU_01516	1	12944	12943	Low-quality	Genome-fragment	23.64	HMM-based (lower-bound)	0	None predicted	YES	2076_0	Clustered
vOTU_01517	28345	82630	54285	High-quality	High-quality	100	AAI-based (medium-confidence)	0	Parabacteroides	YES	2051_0	Clustered
vOTU_01518	25755	136037	110282	High-quality	High-quality	99.42	AAI-based (medium-confidence)	0	None predicted	YES	1845_5	Clustered
vOTU_01519	4811	36551	31740	Low-quality	Genome-fragment	49.23	AAI-based (high-confidence)	0	Bacteroides	NONE	0	Overlap (VC_1833/VC_1834)
vOTU_01520	1	36870	36869	High-quality	High-quality	100	AAI-based (high-confidence)	0	Raoultella	YES	0	Overlap (VC_189/VC_1270)
vOTU_01521	1	37421	37420	High-quality	High-quality	94.37	AAI-based (medium-confidence)	0	Blautia	NONE	0	Overlap (VC_674/VC_1874)
vOTU_01522	1	21414	21413	Medium-quality	Genome-fragment	55.65	AAI-based (high-confidence)	0	None predicted	YES	0	Outlier
vOTU_01523	1	25493	25492	Medium-quality	Genome-fragment	56.23	AAI-based (medium-confidence)	0	None predicted	NONE	575_0	Clustered
vOTU_01525	1	37019	37018	Complete	High-quality	100	DTR (high-confidence)	0	None predicted	YES	2211_0	Clustered
vOTU_01526	1	130370	130369	Medium-quality	Genome-fragment	77.35	HMM-based (lower-bound)	0	Robinsoniella	YES	1816_1	Clustered/Singleton
vOTU_01527	1	35924	35923	High-quality	High-quality	100	AAI-based (high-confidence)	0	Mannheimia	NONE	1269_0	Clustered
vOTU_01528	1	77838	77837	High-quality	High-quality	100	AAI-based (high-confidence)	0	Clostridium	YES	0	Overlap (VC_1019/VC_1021)
vOTU_01529	1	21495	21494	Medium-quality	Genome-fragment	60.66	AAI-based (high-confidence)	0	Ruminococcus	YES	1903_0	Clustered
vOTU_01530	25577	43036	17459	Low-quality	Genome-fragment	38.72	AAI-based (high-confidence)	0	Salmonella	YES	0	Outlier
vOTU_01531	3841	42198	38357	High-quality	High-quality	94.17	AAI-based (high-confidence)	0	Lachnospira	YES	1843_0	Clustered
vOTU_01532	116882	155084	38202	Medium-quality	Genome-fragment	78.45	AAI-based (high-confidence)	0	None predicted	NONE	2118_0	Clustered
vOTU_01533	1	10014	10013	Medium-quality	Genome-fragment	73.32	AAI-based (high-confidence)	0	Streptococcus	NONE	1474_0	Clustered
vOTU_01534	10308	52239	41931	Low-quality	Genome-fragment	31.45	AAI-based (high-confidence)	16.36	None predicted	YES	0	Outlier
vOTU_01535	45010	68831	23821	Medium-quality	Genome-fragment	51.02	AAI-based (high-confidence)	0	Salmonella	YES	44_0	Clustered
vOTU_01537	1	32795	32794	Medium-quality	Genome-fragment	80.79	AAI-based (high-confidence)	0	Bifidobacterium	NONE	1164_0	Clustered
vOTU_01538	4932	48464	43532	High-quality	High-quality	96.43	AAI-based (high-confidence)	0	None predicted	NONE	981_0	Clustered
vOTU_01539	26676	52704	26028	Medium-quality	Genome-fragment	71.82	AAI-based (high-confidence)	0	Coprobacillus	NONE	0	Overlap (VC_1150/VC_2106)
vOTU_01540	200681	222491	21810	Low-quality	Genome-fragment	49.04	AAI-based (high-confidence)	21.71	Salmonella	NONE	62_0	Clustered
vOTU_01542	1	61721	61720	Complete	High-quality	100	DTR (high-confidence)	0	None predicted	NONE	1504_1	Clustered
vOTU_01543	92174	161175	69001	High-quality	High-quality	100	AAI-based (high-confidence)	0	Eubacterium	YES	996_1	Clustered
vOTU_01544	1	4539	4538	Not-determined	Genome-fragment	NA	NA	0	None predicted	NONE	2063_0	Clustered
vOTU_01545	1	26998	26997	Medium-quality	Genome-fragment	69.58	AAI-based (high-confidence)	0	Bifidobacterium	YES	1093_0	Clustered
vOTU_01546	1	38252	38251	High-quality	High-quality	100	AAI-based (medium-confidence)	0	None predicted	YES	1897_0	Clustered
vOTU_01547	1	10865	10864	Low-quality	Genome-fragment	5.53	HMM-based (lower-bound)	0	None predicted	YES	0	Outlier
vOTU_01548	1	30469	30468	Medium-quality	Genome-fragment	78.78	AAI-based (medium-confidence)	0	None predicted	NONE	2155_0	Clustered
vOTU_01549	1	39160	39159	Medium-quality	Genome-fragment	74.3	AAI-based (medium-confidence)	9.26	Bacteroides	NONE	2052_0	Clustered
vOTU_01550	234	52495	52261	High-quality	High-quality	100	AAI-based (high-confidence)	0	None predicted	YES	1780_0	Clustered
vOTU_01552	1	35017	35016	Low-quality	Genome-fragment	48.52	AAI-based (high-confidence)	43.78	Ruminococcus	NONE	1551_0	Clustered
vOTU_01553	57781	154026	96245	Complete	High-quality	100	Provirus (high-confidence)	18.7	Faecalibacterium	NONE	1587_1	Clustered/Singleton
vOTU_01554	23102	57915	34813	Low-quality	Genome-fragment	38.29	AAI-based (high-confidence)	46.76	Butyricimonas	NONE	1819_0	Clustered
vOTU_01555	1	5586	5585	Low-quality	Genome-fragment	24.3	AAI-based (medium-confidence)	0	None predicted	YES	2127_0	Clustered
vOTU_01556	1	7286	7285	Low-quality	Genome-fragment	9.71	HMM-based (lower-bound)	0	None predicted	NONE	2101_0	Clustered
vOTU_01557	1	12328	12327	Low-quality	Genome-fragment	32.25	AAI-based (high-confidence)	0	Streptococcus	NONE	0	Outlier
vOTU_01558	1	23775	23774	Medium-quality	Genome-fragment	56.82	AAI-based (high-confidence)	0	Dialister	YES	1860_0	Clustered
vOTU_01559	7916	83222	75306	High-quality	High-quality	100	AAI-based (high-confidence)	9.44	None predicted	NONE	1846_0	Clustered
vOTU_01560	1	22823	22822	Low-quality	Genome-fragment	48.9	HMM-based (lower-bound)	0	None predicted	NONE	1515_0	Clustered
vOTU_01561	1	20941	20940	Low-quality	Genome-fragment	23.24	AAI-based (high-confidence)	0	Escherichia	NONE	337_0	Clustered
vOTU_01562	79544	116962	37418	High-quality	High-quality	91.83	AAI-based (medium-confidence)	15.23	Haemophilus	YES	5_0	Clustered
vOTU_01563	1	86128	86127	Complete	High-quality	100	DTR (high-confidence)	0	Bacteroides	NONE	1810_0	Clustered
vOTU_01564	1	60573	60572	High-quality	High-quality	99.12	AAI-based (high-confidence)	0	None predicted	NONE	1501_0	Clustered
vOTU_01565	1	22262	22261	Low-quality	Genome-fragment	48.6	AAI-based (high-confidence)	0	Salmonella	YES	44_0	Clustered
vOTU_01566	55020	118054	63034	High-quality	High-quality	100	AAI-based (medium-confidence)	28.3	Bacteroides	YES	1160_0	Clustered
vOTU_01567	254307	306239	51932	High-quality	High-quality	100	AAI-based (medium-confidence)	0	None predicted	YES	1968_2	Clustered
vOTU_01568	1	24982	24981	High-quality	High-quality	92.74	AAI-based (high-confidence)	0	None predicted	NONE	1174_0	Clustered
vOTU_01569	1	73315	73314	Low-quality	Genome-fragment	48.51	AAI-based (high-confidence)	0	Parabacteroides	YES	950_0	Clustered
vOTU_01570	42476	74318	31842	Medium-quality	Genome-fragment	65.97	AAI-based (medium-confidence)	0	Bacteroides	YES	2052_0	Clustered
vOTU_01571	4623	43923	39300	Low-quality	Genome-fragment	41.84	AAI-based (high-confidence)	0	None predicted	NONE	1946_0	Clustered
vOTU_01572	1	40141	40140	High-quality	High-quality	97.5	AAI-based (high-confidence)	0	Enterocloster	YES	1012_0	Clustered
vOTU_01573	7111	35603	28492	Medium-quality	Genome-fragment	65.52	AAI-based (medium-confidence)	0	Prevotella	YES	1943_0	Clustered
vOTU_01574	1	105394	105393	Complete	High-quality	100	DTR (high-confidence)	0	Bacteroides	NONE	946_4	Clustered
vOTU_01577	1	18580	18579	Low-quality	Genome-fragment	46.37	AAI-based (medium-confidence)	0	None predicted	NONE	1515_0	Clustered
vOTU_01578	1	45435	45434	Medium-quality	Genome-fragment	70.08	AAI-based (high-confidence)	0	Bacteroides	YES	1818_2	Clustered
vOTU_01579	118281	172849	54568	High-quality	High-quality	97.18	AAI-based (medium-confidence)	0	None predicted	YES	2002_0	Clustered
vOTU_01580	1	31199	31198	Low-quality	Genome-fragment	18.57	AAI-based (high-confidence)	0	Coprobacillus	YES	0	Outlier
vOTU_01581	1	18178	18177	Low-quality	Genome-fragment	46.9	AAI-based (high-confidence)	0	Enterocloster	YES	704_0	Clustered
vOTU_01583	1	29354	29353	Low-quality	Genome-fragment	17.49	AAI-based (high-confidence)	0	None predicted	YES	0	Outlier
vOTU_01584	85927	142623	56696	High-quality	High-quality	93.6	AAI-based (high-confidence)	6.51	Bacteroides	YES	2134_0	Clustered
vOTU_01585	13791	52352	38561	High-quality	High-quality	95.29	AAI-based (high-confidence)	0	Salmonella	NONE	30_1	Clustered
vOTU_01586	1	50103	50102	High-quality	High-quality	100	AAI-based (high-confidence)	0	Bacteroides	YES	1916_0	Clustered
vOTU_01587	1	39868	39867	High-quality	High-quality	98.62	AAI-based (high-confidence)	0	Veillonella	YES	1855_0	Clustered
vOTU_01588	84435	135082	50647	High-quality	High-quality	98.91	AAI-based (high-confidence)	10.54	None predicted	YES	983_0	Clustered
vOTU_01589	1	115549	115548	High-quality	High-quality	100	AAI-based (high-confidence)	3.54	Bacteroides	YES	2134_0	Clustered
vOTU_01590	214458	246547	32089	High-quality	High-quality	90.14	AAI-based (high-confidence)	0	None predicted	NONE	1583_0	Clustered
vOTU_01591	1	20242	20241	Low-quality	Genome-fragment	38	AAI-based (high-confidence)	0	Salmonella	YES	0	Outlier
vOTU_01592	1	11576	11575	Low-quality	Genome-fragment	34.78	HMM-based (lower-bound)	0	Lachnoclostridium	NONE	0	Outlier
vOTU_01593	1	16035	16034	Medium-quality	Genome-fragment	70.13	AAI-based (medium-confidence)	0	None predicted	YES	2058_0	Clustered
vOTU_01594	1	13929	13928	Low-quality	Genome-fragment	25.62	HMM-based (lower-bound)	0	None predicted	YES	0	Outlier
vOTU_01595	101065	212282	111217	High-quality	High-quality	100	AAI-based (medium-confidence)	0	None predicted	NONE	1845_5	Clustered
vOTU_01598	119588	162011	42423	Medium-quality	Genome-fragment	88.33	AAI-based (medium-confidence)	0	None predicted	NONE	0	Outlier
vOTU_01599	18275	79191	60916	High-quality	High-quality	99.77	AAI-based (high-confidence)	0	Bacteroides	YES	0	Overlap (VC_1260/VC_1999)
vOTU_01600	1	22068	22067	Low-quality	Genome-fragment	49.1	AAI-based (high-confidence)	0	Salmonella	NONE	0	Outlier
vOTU_01601	1	66156	66155	Medium-quality	Genome-fragment	79.2	AAI-based (high-confidence)	0	None predicted	NONE	1507_1	Clustered
vOTU_01602	1	71642	71641	Low-quality	Genome-fragment	49.54	AAI-based (high-confidence)	0	None predicted	YES	0	Overlap (VC_1926/VC_2012)
vOTU_01603	1	26771	26770	Medium-quality	Genome-fragment	68.83	AAI-based (high-confidence)	0	Flavonifractor	NONE	1896_0	Clustered
vOTU_01604	1	12310	12309	Low-quality	Genome-fragment	28.08	AAI-based (high-confidence)	0	None predicted	YES	0	Outlier
vOTU_01605	1	44438	44437	High-quality	High-quality	100	AAI-based (high-confidence)	0	None predicted	YES	0	Outlier
vOTU_01606	1	18275	18274	Medium-quality	Genome-fragment	51.55	AAI-based (high-confidence)	0	Colibacter	YES	0	Overlap (VC_1864/VC_1868)
vOTU_01607	1	103819	103818	Complete	High-quality	100	DTR (high-confidence)	0	Prevotella	NONE	536_2	Clustered
vOTU_01608	1	17213	17212	Complete	High-quality	100	ITR (high-confidence)	0	Bifidobacterium	YES	1793_0	Clustered
vOTU_01609	1	15566	15565	Medium-quality	Genome-fragment	51.84	HMM-based (lower-bound)	0	Clostridium	NONE	2062_0	Clustered
vOTU_01610	452636	470429	17793	Low-quality	Genome-fragment	37.39	AAI-based (medium-confidence)	0	Akkermansia	YES	2139_0	Clustered
vOTU_01611	1	66290	66289	High-quality	High-quality	100	AAI-based (high-confidence)	0	Parabacteroides	YES	0	Overlap (VC_1877/VC_1880)
vOTU_01612	1	37796	37795	Medium-quality	Genome-fragment	78.93	AAI-based (high-confidence)	0	Salmonella	YES	45_0	Clustered
vOTU_01613	1	99662	99661	High-quality	High-quality	100	AAI-based (high-confidence)	0	Bacteroides	YES	535_1	Clustered
vOTU_01614	1	21528	21527	Medium-quality	Genome-fragment	64.65	AAI-based (high-confidence)	0	Pasteurella	YES	0	Overlap (VC_254/VC_331)
vOTU_01615	1	16109	16108	Medium-quality	Genome-fragment	73.11	AAI-based (medium-confidence)	0	Eggerthella	YES	1978_0	Clustered
vOTU_01616	264831	302921	38090	High-quality	High-quality	100	AAI-based (high-confidence)	0	Faecalibacterium	NONE	1581_0	Clustered
vOTU_01618	90662	118639	27977	Medium-quality	Genome-fragment	74.1	AAI-based (high-confidence)	0	Bifidobacterium	YES	1801_0	Clustered
vOTU_01619	49957	92223	42266	High-quality	High-quality	99.75	AAI-based (high-confidence)	0	Raoultella	YES	37_1	Clustered
vOTU_01620	39274	86755	47481	High-quality	High-quality	94.1	AAI-based (high-confidence)	0	Haemophilus	YES	0	Outlier
vOTU_01621	9536	33164	23628	Low-quality	Genome-fragment	49.54	HMM-based (lower-bound)	0	Akkermansia	NONE	2151_0	Clustered
vOTU_01622	127638	181667	54029	High-quality	High-quality	95.4	AAI-based (high-confidence)	0	Bacteroides	YES	2134_0	Clustered
vOTU_01623	1	99163	99162	Complete	High-quality	100	DTR (high-confidence)	0	None predicted	NONE	534_0	Clustered
vOTU_01624	11650	63151	51501	High-quality	High-quality	92.9	AAI-based (high-confidence)	24.92	None predicted	NONE	1859_0	Clustered
vOTU_01625	91514	115180	23666	Medium-quality	Genome-fragment	61.58	AAI-based (high-confidence)	0	Blautia	YES	1525_0	Clustered
vOTU_01626	1	37197	37196	Medium-quality	Genome-fragment	74.01	HMM-based (lower-bound)	0	None predicted	NONE	0	Outlier
vOTU_01627	1	15074	15073	Medium-quality	Genome-fragment	80.83	AAI-based (medium-confidence)	0	Roseburia	YES	0	Overlap (VC_1892/VC_1894)
vOTU_01628	146151	186758	40607	Medium-quality	Genome-fragment	66.13	AAI-based (high-confidence)	0	Bacteroides	YES	1259_8	Clustered
vOTU_01629	6267	77333	71066	High-quality	High-quality	100	AAI-based (high-confidence)	0	Bacteroides	NONE	1915_1	Clustered
vOTU_01633	1	15070	15069	Medium-quality	Genome-fragment	88.47	AAI-based (medium-confidence)	0	None predicted	NONE	2186_0	Clustered
vOTU_01634	17539	150748	133209	High-quality	High-quality	100	AAI-based (high-confidence)	0	Ruminococcus	NONE	2177_0	Clustered
vOTU_01636	1239	47311	46072	High-quality	High-quality	96.57	AAI-based (medium-confidence)	0	None predicted	NONE	934_0	Clustered
vOTU_01637	1	71876	71875	High-quality	High-quality	100	AAI-based (high-confidence)	0	Bacteroides	NONE	1915_1	Clustered
vOTU_01638	13255	27939	14684	Low-quality	Genome-fragment	38.7	AAI-based (high-confidence)	0	Bifidobacterium	NONE	0	Outlier
vOTU_01639	1	29902	29901	Medium-quality	Genome-fragment	51.65	AAI-based (high-confidence)	0	None predicted	NONE	0	Outlier
vOTU_01640	1	44779	44778	Medium-quality	Genome-fragment	81.22	AAI-based (high-confidence)	0	None predicted	NONE	1595_0	Clustered
vOTU_01641	1	33798	33797	High-quality	High-quality	97.67	AAI-based (medium-confidence)	0	Eubacterium	YES	2145_0	Clustered
vOTU_01642	156664	201299	44635	High-quality	High-quality	95.9	AAI-based (high-confidence)	13.58	Eubacterium	NONE	1338_0	Clustered
vOTU_01643	55902	77589	21687	Low-quality	Genome-fragment	40.5	AAI-based (high-confidence)	0	Salmonella	YES	45_0	Clustered
vOTU_01644	200899	236578	35679	High-quality	High-quality	95.72	AAI-based (high-confidence)	22.6	None predicted	NONE	1933_0	Clustered
vOTU_01645	1	16236	16235	Medium-quality	Genome-fragment	86.92	AAI-based (medium-confidence)	0	None predicted	YES	0	Overlap (VC_1891/VC_1892/VC_1894)
vOTU_01646	1	9016	9015	Low-quality	Genome-fragment	21.45	HMM-based (lower-bound)	0	None predicted	YES	0	Outlier
vOTU_01648	59321	139951	80630	High-quality	High-quality	99.23	AAI-based (high-confidence)	12.96	Bacteroides	NONE	1915_1	Clustered
vOTU_01650	29666	78569	48903	High-quality	High-quality	99.34	AAI-based (high-confidence)	8.63	Clostridium	YES	981_0	Clustered
vOTU_01651	25857	62741	36884	Medium-quality	Genome-fragment	69.94	AAI-based (high-confidence)	0	Salmonella	NONE	45_0	Clustered
vOTU_01652	1	47443	47442	High-quality	High-quality	97.45	AAI-based (high-confidence)	0	None predicted	NONE	1572_0	Clustered
vOTU_01653	362693	403173	40480	Medium-quality	Genome-fragment	58.42	AAI-based (medium-confidence)	30.84	Bacteroides	YES	2052_0	Clustered
vOTU_01654	117257	169924	52667	High-quality	High-quality	93	AAI-based (high-confidence)	0	Bacteroides	YES	2134_0	Clustered
vOTU_01655	1	32365	32364	High-quality	High-quality	90.08	AAI-based (high-confidence)	0	Listeria	NONE	517_0	Clustered
vOTU_01656	37029	98636	61607	Complete	High-quality	100	Provirus (high-confidence)	24.29	Faecalibacterium	NONE	911_0	Clustered
vOTU_01657	1	46599	46598	Medium-quality	Genome-fragment	84.92	AAI-based (high-confidence)	12.52	None predicted	YES	933_0	Clustered
vOTU_01658	1	20405	20404	Low-quality	Genome-fragment	38.19	AAI-based (high-confidence)	0	None predicted	NONE	0	Outlier
vOTU_01659	8501	38517	30016	Medium-quality	Genome-fragment	89.81	AAI-based (high-confidence)	2.89	None predicted	NONE	1817_0	Clustered
vOTU_01660	1	40457	40456	High-quality	High-quality	98.51	AAI-based (high-confidence)	0	Clostridium	YES	671_0	Clustered
vOTU_01661	50975	104519	53544	High-quality	High-quality	94.55	AAI-based (high-confidence)	0	Bacteroides	YES	2134_0	Clustered
vOTU_01662	80	59918	59838	High-quality	High-quality	100	AAI-based (high-confidence)	7.38	Blautia	YES	2057_0	Clustered
vOTU_01663	1	32506	32505	Medium-quality	Genome-fragment	82.02	AAI-based (high-confidence)	0	Bifidobacterium	YES	1692_0	Clustered
vOTU_01664	71615	119470	47855	Medium-quality	Genome-fragment	74.32	HMM-based (lower-bound)	0	Bacteroides	YES	2171_0	Clustered
vOTU_01665	60797	107067	46270	Medium-quality	Genome-fragment	77.93	AAI-based (high-confidence)	8.9	Faecalibacterium	NONE	1591_0	Clustered
vOTU_01667	1	91312	91311	Complete	High-quality	100	DTR (high-confidence)	0	None predicted	YES	1094_0	Clustered
vOTU_01668	1	33114	33113	Medium-quality	Genome-fragment	89.26	AAI-based (medium-confidence)	0	Salmonella	YES	248_0	Clustered
vOTU_01669	1	70840	70839	High-quality	High-quality	100	AAI-based (high-confidence)	0	Bacteroides	YES	1915_1	Clustered
vOTU_01670	120102	150586	30484	Low-quality	Genome-fragment	40.17	HMM-based (lower-bound)	0	Akkermansia	YES	2139_0	Clustered
vOTU_01672	1	43264	43263	Medium-quality	Genome-fragment	84.93	AAI-based (high-confidence)	0	None predicted	YES	2013_0	Clustered
vOTU_01673	58194	94153	35959	Medium-quality	Genome-fragment	55.89	AAI-based (medium-confidence)	0	None predicted	YES	2070_0	Clustered
vOTU_01674	1	52642	52641	High-quality	High-quality	98.65	AAI-based (high-confidence)	0	Faecalibacterium	YES	1594_0	Clustered
vOTU_01675	1	42179	42178	High-quality	High-quality	99.73	AAI-based (high-confidence)	0	Salmonella	YES	0	Overlap (VC_38/VC_291)
vOTU_01676	1	67962	67961	High-quality	High-quality	100	AAI-based (high-confidence)	40.36	Ruminococcus	YES	2110_0	Clustered
vOTU_01677	1	40530	40529	Complete	High-quality	100	DTR (high-confidence)	0	Bifidobacterium	YES	1093_0	Clustered
vOTU_01678	1	61408	61407	High-quality	High-quality	99.5	AAI-based (high-confidence)	0	Faecalibacterium	YES	1446_0	Clustered
vOTU_01679	431	53860	53429	High-quality	High-quality	100	AAI-based (high-confidence)	0	Bacteroides	NONE	2031_0	Clustered
vOTU_01680	161	34660	34499	High-quality	High-quality	99.04	AAI-based (high-confidence)	0	Clostridium	NONE	1770_0	Clustered
vOTU_01681	1	60371	60370	Medium-quality	Genome-fragment	85.29	AAI-based (high-confidence)	0	Bacteroides	NONE	1915_1	Clustered
vOTU_01682	140	24767	24627	Medium-quality	Genome-fragment	78.19	AAI-based (high-confidence)	0	Salmonella	YES	226_0	Clustered
vOTU_01683	1	40704	40703	High-quality	High-quality	99.85	AAI-based (high-confidence)	0	Clostridium	YES	0	Overlap (VC_1012/VC_1829)
vOTU_01684	38332	72379	34047	Medium-quality	Genome-fragment	64.25	AAI-based (high-confidence)	0	Akkermansia	NONE	2279_0	Clustered
vOTU_01685	196332	219888	23556	Low-quality	Genome-fragment	43.68	AAI-based (high-confidence)	4.84	Salmonella	YES	57_0	Clustered
vOTU_01686	1	35211	35210	High-quality	High-quality	100	AAI-based (medium-confidence)	0	Colibacter	YES	0	Overlap (VC_1864/VC_1868)
vOTU_01688	35985	94930	58945	Medium-quality	Genome-fragment	88.09	AAI-based (high-confidence)	14.32	None predicted	YES	935_2	Clustered
vOTU_01691	1	16696	16695	Low-quality	Genome-fragment	36.39	AAI-based (high-confidence)	0	None predicted	NONE	0	Outlier
vOTU_01692	11232	60736	49504	High-quality	High-quality	100	AAI-based (medium-confidence)	0	Bacteroides	YES	1962_0	Clustered
vOTU_01693	1	42135	42134	Complete	High-quality	100	DTR (high-confidence)	0	None predicted	NONE	1855_0	Clustered
vOTU_01694	63913	97956	34043	High-quality	High-quality	100	AAI-based (high-confidence)	0	Akkermansia	YES	2189_0	Clustered
vOTU_01695	1	64722	64721	High-quality	High-quality	98.11	AAI-based (high-confidence)	7.98	Faecalibacterium	NONE	1335_0	Clustered
vOTU_01696	1	16872	16871	Medium-quality	Genome-fragment	73.95	AAI-based (medium-confidence)	0	None predicted	YES	2058_0	Clustered
vOTU_01697	1	33555	33554	Low-quality	Genome-fragment	24.68	AAI-based (medium-confidence)	0	None predicted	YES	0	Outlier
vOTU_01698	14973	63728	48755	Medium-quality	Genome-fragment	87.58	AAI-based (high-confidence)	10.66	Bacteroides	YES	1960_0	Clustered
vOTU_01699	1	14691	14690	Low-quality	Genome-fragment	12.45	AAI-based (high-confidence)	0	None predicted	YES	0	Outlier
vOTU_01700	1	19121	19120	Low-quality	Genome-fragment	42.47	AAI-based (high-confidence)	0	None predicted	YES	1819_0	Clustered
vOTU_01701	34743	76438	41695	Medium-quality	Genome-fragment	57.52	HMM-based (lower-bound)	27.43	None predicted	NONE	1934_0	Clustered
vOTU_01702	68287	109615	41328	High-quality	High-quality	100	AAI-based (high-confidence)	0	Bifidobacterium	NONE	0	Overlap (VC_1168/VC_1859)
vOTU_01703	1	120674	120673	High-quality	High-quality	100	AAI-based (high-confidence)	0	None predicted	YES	1932_1	Clustered
vOTU_01704	13679	127948	114269	High-quality	High-quality	100	AAI-based (high-confidence)	0	Bacteroides	YES	1835_1	Clustered
vOTU_01705	1	35208	35207	High-quality	High-quality	93.01	AAI-based (high-confidence)	0	Bifidobacterium	YES	1165_0	Clustered
vOTU_01706	1	28043	28042	Medium-quality	Genome-fragment	72.22	AAI-based (high-confidence)	0	Eubacterium	YES	1588_0	Clustered
vOTU_01707	4299	46652	42353	Medium-quality	Genome-fragment	78.25	AAI-based (high-confidence)	0	Faecalibacterium	NONE	1591_0	Clustered
vOTU_01709	7460	46590	39130	Medium-quality	Genome-fragment	80.84	AAI-based (medium-confidence)	0	Bacteroides	NONE	1819_0	Clustered
vOTU_01710	60247	98513	38266	High-quality	High-quality	100	AAI-based (high-confidence)	0	Bifidobacterium	NONE	1801_0	Clustered
vOTU_01711	754	31194	30440	Low-quality	Genome-fragment	49.79	AAI-based (medium-confidence)	0	Prevotella	YES	0	Overlap (VC_2079/VC_2089)
vOTU_01712	8805	61364	52559	High-quality	High-quality	93.76	AAI-based (high-confidence)	14.14	Acidaminococcus	YES	0	Overlap (VC_936/VC_1345)
vOTU_01713	1	72546	72545	High-quality	High-quality	100	AAI-based (medium-confidence)	0	Bacteroides	YES	2171_0	Clustered
vOTU_01715	56769	82898	26129	Medium-quality	Genome-fragment	66.66	AAI-based (high-confidence)	0	Bifidobacterium	YES	1884_0	Clustered
vOTU_01717	1	37009	37008	Complete	High-quality	100	DTR (high-confidence)	0	Senegalimassilia	NONE	2169_0	Clustered
vOTU_01719	140809	189282	48473	High-quality	High-quality	95.97	AAI-based (high-confidence)	5.11	Klebsiella	YES	0	Outlier
vOTU_01720	1	36676	36675	High-quality	High-quality	96.6	AAI-based (high-confidence)	0	None predicted	YES	0	Outlier
vOTU_01721	2	27026	27024	Low-quality	Genome-fragment	35.56	HMM-based (lower-bound)	0	Akkermansia	YES	2139_0	Clustered
vOTU_01722	1	14861	14860	Medium-quality	Genome-fragment	78.24	AAI-based (medium-confidence)	0	None predicted	NONE	2102_0	Clustered
vOTU_01723	1	28828	28827	Low-quality	Genome-fragment	34.79	HMM-based (lower-bound)	0	Bacteroides	NONE	1929_0	Clustered
vOTU_01724	1	23789	23788	Medium-quality	Genome-fragment	65.8	AAI-based (high-confidence)	0	None predicted	YES	668_0	Clustered
vOTU_01725	1	42564	42563	Complete	High-quality	100	DTR (high-confidence)	0	None predicted	YES	0	Outlier
vOTU_01726	255	45160	44905	Low-quality	Genome-fragment	42.97	AAI-based (high-confidence)	53.6	Flavonifractor	YES	0	Outlier
vOTU_01727	1	27918	27917	High-quality	High-quality	96.97	AAI-based (high-confidence)	0	None predicted	YES	1175_0	Clustered
vOTU_01729	1	44978	44977	Complete	High-quality	100	DTR (high-confidence)	0	Faecalibacterium	YES	981_0	Clustered
vOTU_01730	217458	270293	52835	High-quality	High-quality	90.51	AAI-based (high-confidence)	0	Bacteroides	YES	1868_0	Clustered
vOTU_01731	8649	50245	41596	High-quality	High-quality	97.36	AAI-based (high-confidence)	0	Salmonella	YES	37_1	Clustered
vOTU_01732	1	40050	40049	Medium-quality	Genome-fragment	82.59	AAI-based (high-confidence)	4.95	Salmonella	YES	232_0	Clustered
vOTU_01733	5850	78810	72960	High-quality	High-quality	100	AAI-based (high-confidence)	0	Faecalibacterium	YES	1579_0	Clustered
vOTU_01734	1	35030	35029	Medium-quality	Genome-fragment	87.22	AAI-based (high-confidence)	0	Bifidobacterium	YES	0	Overlap (VC_1172/VC_1690)
vOTU_01735	1	45561	45560	High-quality	High-quality	94.68	AAI-based (medium-confidence)	9.12	Sutterella	NONE	2015_0	Clustered
vOTU_01736	1	55085	55084	High-quality	High-quality	92.54	AAI-based (high-confidence)	24.65	Anaerostipes	YES	1870_0	Clustered
vOTU_01737	11109	50257	39148	High-quality	High-quality	100	AAI-based (high-confidence)	10.9	Salmonella	NONE	0	Overlap (VC_57/VC_228)
vOTU_01738	1	25528	25527	Low-quality	Genome-fragment	36.82	AAI-based (high-confidence)	0	None predicted	YES	0	Outlier
vOTU_01739	1116	36916	35800	High-quality	High-quality	96.48	AAI-based (high-confidence)	0	Tyzzerella	NONE	668_0	Clustered
vOTU_01740	1	36402	36401	High-quality	High-quality	96.14	AAI-based (high-confidence)	0	Clostridium	YES	1958_0	Clustered
vOTU_01741	154975	219243	64268	High-quality	High-quality	99.5	AAI-based (high-confidence)	0	Ruminococcus	YES	1448_5	Clustered
vOTU_01742	2	53790	53788	High-quality	High-quality	100	AAI-based (high-confidence)	0	Salmonella	YES	0	Overlap (VC_61/VC_455)
vOTU_01743	1	37370	37369	Medium-quality	Genome-fragment	87.74	AAI-based (high-confidence)	0	Anaerostipes	YES	2035_0	Clustered
vOTU_01745	1	59379	59378	High-quality	High-quality	97.81	AAI-based (high-confidence)	0	Faecalibacterium	NONE	1335_0	Clustered
vOTU_01746	4340	66526	62186	Medium-quality	Genome-fragment	79.31	AAI-based (high-confidence)	0	Bacteroides	YES	1917_1	Clustered
vOTU_01747	1078	32761	31683	Medium-quality	Genome-fragment	79.87	AAI-based (medium-confidence)	0	Bifidobacterium	YES	0	Overlap (VC_1168/VC_1859)
vOTU_01748	1	15795	15794	Low-quality	Genome-fragment	47.28	HMM-based (lower-bound)	0	None predicted	NONE	2280_0	Clustered
vOTU_01749	1	34467	34466	Medium-quality	Genome-fragment	61.73	AAI-based (medium-confidence)	0	Erysipelatoclostridium	NONE	2122_0	Clustered
vOTU_01750	1	35170	35169	Medium-quality	Genome-fragment	74.6	AAI-based (high-confidence)	0	Faecalibacterium	NONE	1536_0	Clustered
vOTU_01751	1	45726	45725	High-quality	High-quality	100	AAI-based (medium-confidence)	0	Prevotella	YES	1820_0	Clustered
vOTU_01752	9916	41815	31899	Medium-quality	Genome-fragment	86.25	AAI-based (high-confidence)	0	Dorea	NONE	0	Overlap (VC_682/VC_1526/VC_2035)
vOTU_01753	3629	67769	64140	Medium-quality	Genome-fragment	85.48	AAI-based (high-confidence)	19.91	Roseburia	NONE	1526_7	Clustered
vOTU_01754	1	65734	65733	High-quality	High-quality	100	AAI-based (high-confidence)	0	Bacteroides	YES	1818_2	Clustered
vOTU_01756	1	17683	17682	Low-quality	Genome-fragment	49.9	AAI-based (high-confidence)	0	Ruminococcus	YES	0	Outlier
vOTU_01757	1	29265	29264	Medium-quality	Genome-fragment	80.53	AAI-based (medium-confidence)	0	Enterocloster	NONE	0	Overlap (VC_2136/VC_2137)
vOTU_01758	272670	319746	47076	High-quality	High-quality	93.91	AAI-based (high-confidence)	8.74	Salmonella	YES	57_0	Clustered
vOTU_01759	1	88824	88823	Medium-quality	Genome-fragment	85.2	AAI-based (high-confidence)	0	Escherichia	YES	334_0	Clustered
vOTU_01760	1	28246	28245	Medium-quality	Genome-fragment	82.72	AAI-based (high-confidence)	0	Bacteroides	YES	2038_0	Clustered
vOTU_01761	82897	125932	43035	Medium-quality	Genome-fragment	70.01	AAI-based (high-confidence)	0	Bacteroides	YES	1259_8	Clustered
vOTU_01762	1	50990	50989	High-quality	High-quality	100	AAI-based (high-confidence)	0	None predicted	NONE	0	Overlap (VC_840/VC_1026)
vOTU_01763	1	23502	23501	Low-quality	Genome-fragment	20.68	AAI-based (high-confidence)	0	Eggerthella	NONE	0	Outlier
vOTU_01764	1	35134	35133	Medium-quality	Genome-fragment	88.29	AAI-based (high-confidence)	0	Enterocloster	NONE	0	Overlap (VC_682/VC_1526/VC_2035)
vOTU_01765	348305	422564	74259	Complete	High-quality	100	Provirus (high-confidence)	17.03	None predicted	YES	1448_0	Clustered
vOTU_01766	1	36669	36668	Medium-quality	Genome-fragment	59.72	AAI-based (high-confidence)	0	None predicted	NONE	0	Overlap (VC_1337/VC_1448)
vOTU_01767	14930	55338	40408	High-quality	High-quality	99.55	AAI-based (high-confidence)	0	Bifidobacterium	NONE	1164_0	Clustered
vOTU_01768	364246	422427	58181	High-quality	High-quality	100	AAI-based (high-confidence)	15.97	Salmonella	NONE	0	Overlap (VC_45/VC_59)
vOTU_01769	170575	225681	55106	Complete	High-quality	100	Provirus (high-confidence)	21.24	Salmonella	NONE	57_0	Clustered
vOTU_01770	1	22600	22599	Medium-quality	Genome-fragment	64.3	AAI-based (high-confidence)	0	Salmonella	YES	4_0	Clustered
vOTU_01771	12691	64833	52142	Low-quality	Genome-fragment	42.38	AAI-based (high-confidence)	23.97	Alistipes	NONE	1946_0	Clustered
vOTU_01772	396008	430603	34595	Medium-quality	Genome-fragment	53.95	AAI-based (high-confidence)	0	None predicted	NONE	0	Overlap (VC_1839/VC_2143)
vOTU_01773	1	39407	39406	Low-quality	Genome-fragment	24.72	HMM-based (lower-bound)	0	None predicted	YES	2232_0	Clustered
vOTU_01775	1	15027	15026	Medium-quality	Genome-fragment	89.93	AAI-based (medium-confidence)	0	Roseburia	NONE	2236_0	Clustered
vOTU_01776	1	87080	87079	High-quality	High-quality	100	AAI-based (high-confidence)	0	Bacteroides	YES	1810_0	Clustered
vOTU_01777	1	31316	31315	Medium-quality	Genome-fragment	74.02	AAI-based (high-confidence)	0	Faecalibacterium	YES	1786_0	Clustered
vOTU_01778	198	32318	32120	Medium-quality	Genome-fragment	79.63	AAI-based (high-confidence)	0	None predicted	YES	1908_0	Clustered
vOTU_01779	24645	81116	56471	Complete	High-quality	100	Provirus (medium-confidence)	34.5	Enterocloster	NONE	676_0	Clustered
vOTU_01780	1	55848	55847	Complete	High-quality	100	DTR (high-confidence)	0	None predicted	YES	716_2	Clustered
vOTU_01781	1	4538	4537	Not-determined	Genome-fragment	NA	NA	0	None predicted	YES	2063_0	Clustered
vOTU_01782	1	36243	36242	Medium-quality	Genome-fragment	71.79	AAI-based (high-confidence)	9.41	Salmonella	NONE	57_0	Clustered
vOTU_01783	22818	88077	65259	High-quality	High-quality	100	AAI-based (high-confidence)	0	Salmonella	NONE	30_3	Clustered/Singleton
vOTU_01784	11017	68670	57653	High-quality	High-quality	100	AAI-based (high-confidence)	3.04	Bacteroides	NONE	1916_0	Clustered
vOTU_01785	1	45981	45980	Complete	High-quality	100	DTR (high-confidence)	0	Erysipelatoclostridium	YES	1990_0	Clustered
vOTU_01786	1	54167	54166	High-quality	High-quality	95.57	AAI-based (high-confidence)	35.36	Lawsonibacter	YES	1569_1	Clustered
vOTU_01787	1	40085	40084	Medium-quality	Genome-fragment	87.47	AAI-based (medium-confidence)	0	Campylobacter	NONE	0	Outlier
vOTU_01788	190739	236225	45486	Medium-quality	Genome-fragment	73.3	AAI-based (high-confidence)	44.52	None predicted	YES	1587_0	Clustered
vOTU_01789	27628	69031	41403	High-quality	High-quality	100	AAI-based (high-confidence)	0	Salmonella	YES	4_0	Clustered
vOTU_01791	1	47073	47072	Complete	High-quality	100	Provirus (medium-confidence)	26.22	Bifidobacterium	YES	1884_0	Clustered
vOTU_01792	1	16207	16206	Medium-quality	Genome-fragment	73.53	AAI-based (medium-confidence)	0	Eggerthella	NONE	1978_0	Clustered
vOTU_01793	1	33107	33106	Medium-quality	Genome-fragment	85.27	AAI-based (high-confidence)	0	Bifidobacterium	NONE	1093_0	Clustered
vOTU_01794	1	50299	50298	High-quality	High-quality	99.36	AAI-based (high-confidence)	0	Prevotella	NONE	1961_0	Clustered
vOTU_01795	1	30858	30857	Medium-quality	Genome-fragment	74.78	AAI-based (high-confidence)	0	None predicted	NONE	2019_0	Clustered
vOTU_01796	1	96559	96558	Complete	High-quality	100	DTR (high-confidence)	0	Bacteroides	NONE	1114_0	Clustered
vOTU_01798	874	48322	47448	High-quality	High-quality	95.8	AAI-based (high-confidence)	0	Bacteroides	NONE	1916_0	Clustered
vOTU_01799	1	30650	30649	Low-quality	Genome-fragment	49.84	AAI-based (high-confidence)	0	Bacteroides	NONE	1976_1	Clustered/Singleton
vOTU_01800	1	37422	37421	High-quality	High-quality	100	AAI-based (high-confidence)	0	Salmonella	NONE	248_0	Clustered
vOTU_01801	1	15538	15537	Low-quality	Genome-fragment	23.39	AAI-based (high-confidence)	0	Ruminococcus	NONE	0	Outlier
vOTU_01802	1	17321	17320	Medium-quality	Genome-fragment	89.69	AAI-based (medium-confidence)	0	Eggerthella	NONE	783_0	Clustered
vOTU_01803	41507	105827	64320	High-quality	High-quality	96.43	AAI-based (high-confidence)	0	Ruminococcus	NONE	2177_0	Clustered
vOTU_01804	1	24626	24625	Medium-quality	Genome-fragment	70.13	AAI-based (high-confidence)	0	Salmonella	NONE	4_0	Clustered
vOTU_01805	4386	54243	49857	High-quality	High-quality	97.73	AAI-based (high-confidence)	0	Bacteroides	YES	1961_0	Clustered
vOTU_01807	1	15068	15067	Medium-quality	Genome-fragment	76.38	AAI-based (medium-confidence)	0	None predicted	NONE	2071_0	Clustered
vOTU_01808	1	41255	41254	High-quality	High-quality	100	AAI-based (high-confidence)	0	Veillonella	NONE	1054_0	Clustered
vOTU_01809	1	36606	36605	High-quality	High-quality	94.71	AAI-based (high-confidence)	0	Blautia	YES	360_0	Clustered
vOTU_01810	1	18133	18132	Low-quality	Genome-fragment	30.71	AAI-based (medium-confidence)	0	Escherichia	NONE	0	Overlap (VC_53/VC_59)
vOTU_01811	1	34912	34911	Medium-quality	Genome-fragment	85.7	AAI-based (high-confidence)	7.2	Bifidobacterium	YES	1801_0	Clustered
vOTU_01812	2	27312	27310	Medium-quality	Genome-fragment	77.65	AAI-based (high-confidence)	0	Salmonella	YES	4_0	Clustered
vOTU_01813	1	57877	57876	High-quality	High-quality	99.4	AAI-based (high-confidence)	0	None predicted	YES	1846_0	Clustered
vOTU_01814	1	72431	72430	Medium-quality	Genome-fragment	89.54	AAI-based (high-confidence)	12.59	Bacteroides	NONE	1915_1	Clustered
vOTU_01816	1	43878	43877	High-quality	High-quality	97.87	AAI-based (high-confidence)	16.14	Ruminococcus	YES	2143_0	Clustered
vOTU_01817	1	37908	37907	High-quality	High-quality	100	AAI-based (medium-confidence)	0	Salmonella	YES	248_0	Clustered
vOTU_01818	68773	136303	67530	High-quality	High-quality	100	AAI-based (high-confidence)	0	Ruminococcus	NONE	2177_0	Clustered
vOTU_01819	1	86510	86509	Complete	High-quality	100	DTR (high-confidence)	0	Bacteroides	YES	1810_0	Clustered
vOTU_01820	1868	31223	29355	Medium-quality	Genome-fragment	78.08	AAI-based (high-confidence)	0	None predicted	YES	2143_0	Clustered
vOTU_01821	2024	81065	79041	High-quality	High-quality	95.34	AAI-based (high-confidence)	11.02	None predicted	NONE	2128_0	Clustered
vOTU_01822	1	33536	33535	Medium-quality	Genome-fragment	80.13	AAI-based (high-confidence)	0	Faecalibacterium	YES	1580_0	Clustered
vOTU_01824	1	40042	40041	High-quality	High-quality	98.42	AAI-based (high-confidence)	0	None predicted	NONE	0	Overlap (VC_1784/VC_1788/VC_1902)
vOTU_01825	1	112309	112308	High-quality	High-quality	100	AAI-based (high-confidence)	0	Bacteroides	YES	1835_6	Clustered
vOTU_01826	8788	47032	38244	High-quality	High-quality	100	AAI-based (high-confidence)	0	Collinsella	NONE	1785_0	Clustered
vOTU_01828	69455	114240	44785	Medium-quality	Genome-fragment	84.9	AAI-based (high-confidence)	26.3	Odoribacter	NONE	2256_0	Clustered
vOTU_01829	1	45896	45895	High-quality	High-quality	100	AAI-based (high-confidence)	0	Bifidobacterium	NONE	1168_0	Clustered
vOTU_01830	1	56755	56754	High-quality	High-quality	100	AAI-based (medium-confidence)	4.38	Bifidobacterium	YES	1801_0	Clustered
vOTU_01831	59264	80537	21273	Low-quality	Genome-fragment	18.28	AAI-based (high-confidence)	55.19	Klebsiella	YES	0	Outlier
vOTU_01832	1	17033	17032	Medium-quality	Genome-fragment	74.03	AAI-based (medium-confidence)	0	None predicted	NONE	2058_0	Clustered
vOTU_01833	1	10867	10866	Complete	High-quality	100	DTR (medium-confidence)	0	None predicted	YES	1885_0	Clustered
vOTU_01834	1	14330	14329	Low-quality	Genome-fragment	30.94	AAI-based (high-confidence)	0	None predicted	NONE	0	Outlier
vOTU_01835	6616	58505	51889	Medium-quality	Genome-fragment	86.04	AAI-based (high-confidence)	14.29	Ruminococcus	NONE	1529_1	Clustered
vOTU_01836	1	35921	35920	Complete	High-quality	100	DTR (high-confidence)	0	Tyzzerella	NONE	0	Overlap (VC_682/VC_1526/VC_2035/VC_2055)
vOTU_01837	35970	54241	18271	Low-quality	Genome-fragment	18.57	AAI-based (medium-confidence)	29.17	Bacteroides	YES	2120_0	Clustered
vOTU_01838	150263	217090	66827	High-quality	High-quality	100	AAI-based (high-confidence)	0	Ruminococcus	NONE	2177_0	Clustered
vOTU_01839	1	22599	22598	Low-quality	Genome-fragment	36.23	AAI-based (medium-confidence)	0	None predicted	NONE	0	Outlier
vOTU_01840	1	11678	11677	Low-quality	Genome-fragment	12.86	AAI-based (medium-confidence)	0	None predicted	NONE	2282_0	Clustered
vOTU_01843	1	4428	4427	Not-determined	Genome-fragment	NA	NA	0	None predicted	NONE	2283_0	Clustered
vOTU_01844	1	43012	43011	Complete	High-quality	100	DTR (high-confidence)	0	Faecalibacterium	YES	1786_0	Clustered
vOTU_01845	1	28479	28478	Medium-quality	Genome-fragment	56.97	AAI-based (high-confidence)	0	Salmonella	YES	0	Overlap (VC_53/VC_59)
vOTU_01846	1	32370	32369	Medium-quality	Genome-fragment	52.45	AAI-based (high-confidence)	0	Mediterraneibacter	YES	0	Overlap (VC_1527/VC_2196)
vOTU_01847	1	62796	62795	High-quality	High-quality	97.17	AAI-based (high-confidence)	0	Faecalibacterium	NONE	1579_0	Clustered
vOTU_01848	27125	51676	24551	Low-quality	Genome-fragment	10.84	AAI-based (high-confidence)	22.95	None predicted	NONE	1515_0	Clustered
vOTU_01849	162602	262217	99615	High-quality	High-quality	100	AAI-based (high-confidence)	0	Bacteroides	NONE	1259_3	Clustered/Singleton
vOTU_01850	1	38940	38939	Medium-quality	Genome-fragment	85.13	AAI-based (high-confidence)	0	Salmonella	YES	44_0	Clustered
vOTU_01851	1	35107	35106	High-quality	High-quality	94.63	AAI-based (medium-confidence)	0	Clostridium	NONE	0	Overlap (VC_877/VC_988/VC_1005/VC_2215)
vOTU_01852	4665	35042	30377	Medium-quality	Genome-fragment	69.88	AAI-based (high-confidence)	20.26	None predicted	YES	1587_0	Clustered
vOTU_01854	63121	106338	43217	Medium-quality	Genome-fragment	70.6	AAI-based (high-confidence)	0	Parabacteroides	YES	0	Overlap (VC_1260/VC_2001/VC_2004)
vOTU_01855	1	54795	54794	Complete	High-quality	100	DTR (high-confidence)	0	Erysipelatoclostridium	NONE	2029_0	Clustered
vOTU_01856	1	20292	20291	Medium-quality	Genome-fragment	57.39	AAI-based (medium-confidence)	0	None predicted	NONE	0	Outlier
vOTU_01857	1	6827	6826	Complete	High-quality	100	DTR (high-confidence)	0	Prevotella	NONE	1676_0	Clustered
vOTU_01858	248555	306895	58340	Medium-quality	Genome-fragment	89.37	AAI-based (high-confidence)	0	Eubacterium	NONE	0	Overlap (VC_1799/VC_2009)
vOTU_01859	1	30240	30239	Medium-quality	Genome-fragment	53.64	AAI-based (high-confidence)	0	Escherichia	YES	0	Overlap (VC_53/VC_59)
vOTU_01860	1	12713	12712	Low-quality	Genome-fragment	34.14	AAI-based (high-confidence)	0	Bifidobacterium	NONE	0	Outlier
vOTU_01861	65840	105363	39523	High-quality	High-quality	97.36	AAI-based (high-confidence)	0	Blautia	YES	1508_0	Clustered
vOTU_01862	289589	342553	52964	High-quality	High-quality	93.52	AAI-based (high-confidence)	0	Bacteroides	NONE	2134_0	Clustered
vOTU_01863	1	27874	27873	Low-quality	Genome-fragment	47.87	AAI-based (high-confidence)	0	None predicted	NONE	0	Outlier
vOTU_01864	1	32604	32603	Complete	High-quality	100	DTR (high-confidence)	0	None predicted	YES	0	Overlap (VC_911/VC_2260)
vOTU_01865	882	79388	78506	Medium-quality	Genome-fragment	74.25	HMM-based (lower-bound)	0	Ruminococcus	NONE	0	Outlier
vOTU_01866	28744	54870	26126	Low-quality	Genome-fragment	31.19	AAI-based (high-confidence)	26.33	Faecalibacterium	NONE	0	Outlier
vOTU_01867	24551	66914	42363	High-quality	High-quality	100	AAI-based (high-confidence)	0	Clostridium	YES	0	Outlier
vOTU_01868	2863	39475	36612	High-quality	High-quality	96.46	AAI-based (high-confidence)	0	Bifidobacterium	YES	1165_0	Clustered
vOTU_01869	1	76349	76348	High-quality	High-quality	91.47	AAI-based (high-confidence)	0	None predicted	YES	0	Outlier
vOTU_01870	1	80494	80493	High-quality	High-quality	100	AAI-based (high-confidence)	0	Flavonifractor	YES	2037_0	Clustered
vOTU_01871	61698	123634	61936	High-quality	High-quality	100	AAI-based (high-confidence)	0	None predicted	NONE	2125_0	Clustered
vOTU_01873	1	85815	85814	Complete	High-quality	100	DTR (high-confidence)	0	Bacteroides	YES	1811_0	Clustered
vOTU_01875	1	10185	10184	Low-quality	Genome-fragment	25.68	AAI-based (medium-confidence)	0	None predicted	YES	2285_0	Clustered
vOTU_01876	2461	58376	55915	High-quality	High-quality	91.29	AAI-based (high-confidence)	0	Parabacteroides	YES	0	Overlap (VC_1260/VC_2001/VC_2004)
vOTU_01877	70512	104770	34258	Medium-quality	Genome-fragment	88.68	AAI-based (high-confidence)	0	Ruminococcus	NONE	1839_0	Clustered
vOTU_01878	1	31786	31785	Medium-quality	Genome-fragment	75.47	AAI-based (high-confidence)	0	Enterocloster	YES	676_0	Clustered
vOTU_01879	1	19877	19876	Low-quality	Genome-fragment	39.62	AAI-based (high-confidence)	0	Salmonella	NONE	0	Outlier
vOTU_01880	1	14349	14348	Medium-quality	Genome-fragment	75.12	AAI-based (medium-confidence)	0	None predicted	NONE	0	Overlap (VC_1890/VC_1892)
vOTU_01881	1	12486	12485	Low-quality	Genome-fragment	11.96	AAI-based (high-confidence)	0	Escherichia	YES	0	Outlier
vOTU_01882	1	19825	19824	Low-quality	Genome-fragment	46.14	AAI-based (high-confidence)	0	None predicted	YES	0	Outlier
vOTU_01884	1	15320	15319	Medium-quality	Genome-fragment	67.55	AAI-based (medium-confidence)	0	Erysipelatoclostridium	YES	1830_0	Clustered
vOTU_01886	1	29850	29849	Low-quality	Genome-fragment	43.8	AAI-based (high-confidence)	40.09	Flavonifractor	YES	1896_0	Clustered
vOTU_01887	1	35419	35418	Medium-quality	Genome-fragment	57.78	AAI-based (high-confidence)	0	None predicted	YES	0	Overlap (VC_1260/VC_1977)
vOTU_01889	47901	78209	30308	High-quality	High-quality	93.34	AAI-based (high-confidence)	0	Bacteroides	YES	1817_0	Clustered
vOTU_01890	1	47122	47121	High-quality	High-quality	100	AAI-based (high-confidence)	0	None predicted	NONE	1593_0	Clustered
vOTU_01891	1	30474	30473	Medium-quality	Genome-fragment	84.17	AAI-based (high-confidence)	0	Veillonella	NONE	1867_0	Clustered
vOTU_01892	1	23525	23524	Medium-quality	Genome-fragment	57.02	AAI-based (high-confidence)	8.89	Streptococcus	YES	282_0	Clustered
vOTU_01893	13342	46646	33304	High-quality	High-quality	100	AAI-based (high-confidence)	0	None predicted	YES	1817_0	Clustered
vOTU_01894	1	25361	25360	Medium-quality	Genome-fragment	65.64	AAI-based (high-confidence)	0	Tyzzerella	YES	0	Overlap (VC_682/VC_1526/VC_2035/VC_2055)
vOTU_01895	1	6295	6294	Complete	High-quality	100	DTR (high-confidence)	0	Bacteroides	NONE	2166_0	Clustered
vOTU_01896	153962	209071	55109	High-quality	High-quality	90.79	AAI-based (high-confidence)	6.7	Bacteroides	YES	2134_0	Clustered
vOTU_01897	8367	55916	47549	Medium-quality	Genome-fragment	76.98	AAI-based (high-confidence)	0	Bacteroides	YES	1259_8	Clustered
vOTU_01898	1	56314	56313	Complete	High-quality	100	DTR (high-confidence)	0	Bacteroides	NONE	1822_0	Clustered
vOTU_01899	1	34525	34524	Low-quality	Genome-fragment	14.15	AAI-based (high-confidence)	0	None predicted	YES	489_0	Clustered
vOTU_01900	1	87610	87609	High-quality	High-quality	100	AAI-based (high-confidence)	0	None predicted	NONE	1955_0	Clustered
vOTU_01901	1	14477	14476	Low-quality	Genome-fragment	34.81	AAI-based (high-confidence)	0	Sutterella	YES	0	Outlier
vOTU_01902	29242	95636	66394	High-quality	High-quality	100	AAI-based (high-confidence)	13.19	None predicted	YES	0	Overlap (VC_1550/VC_1551)
vOTU_01903	17496	50509	33013	Medium-quality	Genome-fragment	69.43	AAI-based (high-confidence)	16.52	Bifidobacterium	NONE	1689_0	Clustered
vOTU_01904	1	59216	59215	Medium-quality	Genome-fragment	79.59	AAI-based (high-confidence)	0	Prevotella	NONE	1999_0	Clustered
vOTU_01905	303	52176	51873	Medium-quality	Genome-fragment	71.83	HMM-based (lower-bound)	0	Bacteroides	NONE	1929_0	Clustered
vOTU_01907	1	14796	14795	Low-quality	Genome-fragment	46.64	HMM-based (lower-bound)	0	Clostridium	NONE	0	Outlier
vOTU_01908	2356	42448	40092	Medium-quality	Genome-fragment	80.62	AAI-based (high-confidence)	0	None predicted	NONE	1960_0	Clustered
vOTU_01910	1	46107	46106	High-quality	High-quality	100	AAI-based (high-confidence)	0	Eubacterium	NONE	981_0	Clustered
vOTU_01911	53034	104133	51099	Medium-quality	Genome-fragment	71.15	AAI-based (high-confidence)	14.06	None predicted	YES	1446_0	Clustered
vOTU_01912	215766	328623	112857	High-quality	High-quality	100	AAI-based (high-confidence)	0	None predicted	YES	1838_0	Clustered
vOTU_01913	1	27086	27085	Medium-quality	Genome-fragment	71.53	AAI-based (high-confidence)	0	Anaerostipes	YES	1958_0	Clustered
vOTU_01914	1	15187	15186	Medium-quality	Genome-fragment	80.68	AAI-based (medium-confidence)	0	None predicted	NONE	2102_0	Clustered
vOTU_01915	254166	299180	45014	Medium-quality	Genome-fragment	79.43	AAI-based (high-confidence)	11.65	Salmonella	NONE	0	Overlap (VC_47/VC_58/VC_62)
vOTU_01916	1	10340	10339	Low-quality	Genome-fragment	22.6	AAI-based (medium-confidence)	0	Ruminococcus	NONE	2287_0	Clustered
vOTU_01917	1	36864	36863	High-quality	High-quality	99	AAI-based (high-confidence)	0	Escherichia	YES	50_0	Clustered
vOTU_01918	1	15227	15226	Medium-quality	Genome-fragment	68.94	AAI-based (medium-confidence)	0	Eggerthella	YES	1978_0	Clustered
vOTU_01919	1	26635	26634	Medium-quality	Genome-fragment	71.78	AAI-based (high-confidence)	0	None predicted	NONE	0	Overlap (VC_1870/VC_1939)
vOTU_01921	1	9771	9770	Low-quality	Genome-fragment	28.43	AAI-based (high-confidence)	0	None predicted	YES	0	Outlier
vOTU_01923	3033	45845	42812	High-quality	High-quality	100	AAI-based (medium-confidence)	0	Erysipelatoclostridium	NONE	1731_0	Clustered
vOTU_01924	1	16860	16859	Medium-quality	Genome-fragment	73.5	AAI-based (medium-confidence)	0	None predicted	YES	2058_0	Clustered
vOTU_01925	29206	73472	44266	High-quality	High-quality	97.36	AAI-based (high-confidence)	16.23	Lachnospira	NONE	1778_0	Clustered
vOTU_01926	1	55012	55011	High-quality	High-quality	100	AAI-based (high-confidence)	30.1	Bifidobacterium	YES	1165_0	Clustered
vOTU_01927	53104	83410	30306	Medium-quality	Genome-fragment	78.13	AAI-based (high-confidence)	0	Bifidobacterium	NONE	1093_0	Clustered
vOTU_01928	1	57935	57934	Medium-quality	Genome-fragment	81.81	AAI-based (high-confidence)	0	Bacteroides	NONE	1915_1	Clustered
vOTU_01930	1	60573	60572	Complete	High-quality	100	Provirus (medium-confidence)	25.17	Bacteroides	NONE	2171_0	Clustered
vOTU_01931	23115	64028	40913	Medium-quality	Genome-fragment	85.49	AAI-based (high-confidence)	15.84	None predicted	YES	670_1	Clustered
vOTU_01932	1	57330	57329	Medium-quality	Genome-fragment	84.16	AAI-based (high-confidence)	19.08	Bacteroides	NONE	0	Overlap (VC_1808/VC_1878)
vOTU_01933	51208	92786	41578	High-quality	High-quality	100	AAI-based (high-confidence)	0	Ruminococcus	YES	1948_0	Clustered
vOTU_01934	1	40504	40503	High-quality	High-quality	100	AAI-based (high-confidence)	0	Bifidobacterium	YES	1692_0	Clustered
vOTU_01935	157	55113	54956	High-quality	High-quality	90.61	AAI-based (high-confidence)	0	None predicted	NONE	1501_0	Clustered
vOTU_01936	48872	99196	50324	High-quality	High-quality	100	AAI-based (high-confidence)	13.05	None predicted	YES	1523_0	Clustered
vOTU_01937	2189	57666	55477	High-quality	High-quality	90.61	AAI-based (high-confidence)	0	Parabacteroides	NONE	0	Overlap (VC_1260/VC_2001/VC_2004)
vOTU_01938	26076	74812	48736	Medium-quality	Genome-fragment	84.7	AAI-based (high-confidence)	0	Citrobacter	NONE	0	Overlap (VC_43/VC_53/VC_59)
vOTU_01939	939	88094	87155	High-quality	High-quality	100	AAI-based (high-confidence)	0	Flavonifractor	NONE	1590_0	Clustered
vOTU_01940	421459	515023	93564	Low-quality	Genome-fragment	35.08	HMM-based (lower-bound)	64.77	Ruminococcus	YES	2284_0	Clustered
vOTU_01941	1	17641	17640	Low-quality	Genome-fragment	47.88	AAI-based (high-confidence)	0	Collinsella	NONE	1995_0	Clustered
vOTU_01942	1	30544	30543	Medium-quality	Genome-fragment	54.68	AAI-based (high-confidence)	38.72	None predicted	NONE	1777_0	Clustered
vOTU_01943	1	37980	37979	High-quality	High-quality	100	AAI-based (high-confidence)	0	Blautia	NONE	0	Overlap (VC_1149/VC_1924)
vOTU_01944	62894	135829	72935	High-quality	High-quality	100	AAI-based (high-confidence)	9.98	Bacteroides	NONE	1818_2	Clustered
vOTU_01945	44892	95924	51032	High-quality	High-quality	100	AAI-based (high-confidence)	0	Faecalibacterium	NONE	1581_0	Clustered
vOTU_01946	1	22803	22802	Low-quality	Genome-fragment	47.09	AAI-based (high-confidence)	0	Oscillibacter	NONE	1989_0	Clustered
vOTU_01947	1	112998	112997	High-quality	High-quality	100	AAI-based (high-confidence)	0	Bacteroides	NONE	1835_6	Clustered
vOTU_01948	2	38689	38687	Medium-quality	Genome-fragment	86.57	AAI-based (high-confidence)	25.5	Salmonella	NONE	78_0	Clustered
vOTU_01949	105175	189402	84227	High-quality	High-quality	100	AAI-based (medium-confidence)	21.58	Bacteroides	NONE	1818_2	Clustered
vOTU_01950	1	22628	22627	Medium-quality	Genome-fragment	61.04	AAI-based (high-confidence)	0	Haemophilus	NONE	0	Outlier
vOTU_01951	1	15044	15043	Low-quality	Genome-fragment	43.2	AAI-based (high-confidence)	0	Anaerotruncus	NONE	0	Outlier
vOTU_01952	92755	134580	41825	High-quality	High-quality	100	AAI-based (medium-confidence)	0	Bacteroides	NONE	2171_0	Clustered
vOTU_01954	21073	94011	72938	High-quality	High-quality	99.3	AAI-based (high-confidence)	11.95	Bacteroides	YES	1818_2	Clustered
vOTU_01955	1	55614	55613	High-quality	High-quality	100	AAI-based (high-confidence)	13.87	Faecalibacterium	NONE	1536_0	Clustered
vOTU_01956	1	25583	25582	Low-quality	Genome-fragment	36.45	HMM-based (lower-bound)	29.35	None predicted	YES	0	Outlier
vOTU_01957	84342	197870	113528	High-quality	High-quality	100	AAI-based (high-confidence)	0	Bacteroides	NONE	1835_1	Clustered
vOTU_01958	1	19111	19110	Medium-quality	Genome-fragment	55.79	AAI-based (high-confidence)	0	Streptococcus	YES	338_0	Clustered
vOTU_01959	1	14593	14592	Low-quality	Genome-fragment	45.93	AAI-based (high-confidence)	0	Salmonella	YES	0	Outlier
vOTU_01960	365512	399120	33608	Medium-quality	Genome-fragment	87.94	AAI-based (high-confidence)	0	Ruminococcus	NONE	1948_0	Clustered
vOTU_01961	201084	259972	58888	High-quality	High-quality	95.42	AAI-based (high-confidence)	0	Faecalibacterium	NONE	1446_0	Clustered
vOTU_01962	1	18641	18640	Low-quality	Genome-fragment	48.61	AAI-based (high-confidence)	0	Bifidobacterium	YES	0	Outlier
vOTU_01963	18517	67552	49035	High-quality	High-quality	98.94	AAI-based (high-confidence)	0	None predicted	NONE	1916_0	Clustered
vOTU_01964	1	6884	6883	Low-quality	Genome-fragment	1.1	HMM-based (lower-bound)	0	None predicted	YES	0	Singleton
vOTU_01965	1	58217	58216	Complete	High-quality	100	DTR (high-confidence)	0	Subdoligranulum	YES	1911_0	Clustered
vOTU_01966	46140	85523	39383	High-quality	High-quality	97.03	AAI-based (high-confidence)	0	Bifidobacterium	YES	1164_0	Clustered
vOTU_01967	42952	79003	36051	Medium-quality	Genome-fragment	87.08	AAI-based (high-confidence)	18.23	Ruminococcus	NONE	2144_0	Clustered
vOTU_01968	1	17057	17056	Low-quality	Genome-fragment	37.92	AAI-based (high-confidence)	0	Ruminococcus	YES	0	Outlier
vOTU_01969	1	8935	8934	Low-quality	Genome-fragment	18.25	AAI-based (medium-confidence)	0	Haemophilus	NONE	0	Outlier
vOTU_01970	1	33344	33343	Medium-quality	Genome-fragment	89.88	AAI-based (medium-confidence)	0	Salmonella	YES	248_0	Clustered
vOTU_01971	1	21965	21964	Medium-quality	Genome-fragment	55.23	AAI-based (high-confidence)	0	None predicted	YES	513_0	Clustered
vOTU_01972	1	31523	31522	Medium-quality	Genome-fragment	82.38	AAI-based (high-confidence)	0	Ruminococcus	NONE	1904_0	Clustered
vOTU_01973	1	46084	46083	Complete	High-quality	100	DTR (high-confidence)	0	Prevotella	YES	1823_0	Clustered
vOTU_01974	248819	285336	36517	High-quality	High-quality	95.77	AAI-based (high-confidence)	12.5	Akkermansia	YES	2208_0	Clustered
vOTU_01975	1	98945	98944	Complete	High-quality	100	DTR (high-confidence)	0	Bacteroides	YES	0	Overlap (VC_535/VC_1101/VC_1102)
vOTU_01976	1	5089	5088	Complete	High-quality	100	DTR (high-confidence)	0	Phascolarctobacterium	NONE	1432_0	Clustered
vOTU_01977	1	45247	45246	High-quality	High-quality	100	AAI-based (high-confidence)	0	None predicted	NONE	2135_0	Clustered
vOTU_01978	1	57554	57553	High-quality	High-quality	98.6	AAI-based (high-confidence)	0	Bacteroides	YES	1868_0	Clustered
vOTU_01979	1	90136	90135	Complete	High-quality	100	DTR (high-confidence)	0	None predicted	YES	1094_0	Clustered
vOTU_01980	1	10685	10684	Low-quality	Genome-fragment	20.31	AAI-based (medium-confidence)	0	None predicted	YES	0	Overlap (VC_2043/VC_2263)
vOTU_01981	1	125907	125906	High-quality	High-quality	100	AAI-based (medium-confidence)	8.51	None predicted	NONE	1845_1	Clustered
vOTU_01982	1	26508	26507	Medium-quality	Genome-fragment	64.2	AAI-based (high-confidence)	0	Faecalibacterium	YES	0	Outlier
vOTU_01983	1	67139	67138	Medium-quality	Genome-fragment	81.55	AAI-based (high-confidence)	0	None predicted	YES	1955_0	Clustered
vOTU_01985	1	46341	46340	Medium-quality	Genome-fragment	78.86	AAI-based (high-confidence)	7.62	Salmonella	YES	45_0	Clustered
vOTU_01986	1	26400	26399	Medium-quality	Genome-fragment	68.27	AAI-based (high-confidence)	0	Tyzzerella	YES	0	Overlap (VC_682/VC_1526/VC_2035/VC_2055)
vOTU_01987	1	70524	70523	High-quality	High-quality	100	AAI-based (high-confidence)	0	Parabacteroides	YES	1876_0	Clustered
vOTU_01988	62372	129833	67461	High-quality	High-quality	100	AAI-based (high-confidence)	0	Faecalibacterium	YES	1539_2	Clustered
vOTU_01989	2	21720	21718	Medium-quality	Genome-fragment	69.01	AAI-based (high-confidence)	0	Salmonella	NONE	226_0	Clustered
vOTU_01990	1	83773	83772	High-quality	High-quality	96.52	AAI-based (high-confidence)	0	None predicted	YES	1810_0	Clustered
vOTU_01991	5837	66295	60458	High-quality	High-quality	100	AAI-based (high-confidence)	8.13	Faecalibacterium	NONE	1591_0	Clustered
vOTU_01992	1	39692	39691	Medium-quality	Genome-fragment	85.94	AAI-based (medium-confidence)	0	Salmonella	YES	63_0	Clustered
vOTU_01993	1	48259	48258	Low-quality	Genome-fragment	43.06	HMM-based (lower-bound)	23.7	Parabacteroides	NONE	0	Outlier
vOTU_01994	1	105016	105015	High-quality	High-quality	94.18	AAI-based (high-confidence)	0	Bacteroides	YES	1835_2	Clustered
vOTU_01995	1	37966	37965	Medium-quality	Genome-fragment	62.4	AAI-based (medium-confidence)	0	Bacteroides	YES	1819_0	Clustered
vOTU_01996	494900	529734	34834	High-quality	High-quality	100	AAI-based (high-confidence)	0	Veillonella	YES	1941_0	Clustered
vOTU_01997	4794	73470	68676	High-quality	High-quality	100	AAI-based (high-confidence)	3.94	Bacteroides	NONE	1818_2	Clustered
vOTU_01998	1	9184	9183	Not-determined	Genome-fragment	NA	NA	0	Parabacteroides	NONE	2203_0	Clustered
vOTU_01999	1	34686	34685	Medium-quality	Genome-fragment	83.64	AAI-based (high-confidence)	0	Blautia	YES	680_0	Clustered
vOTU_02000	16320	67437	51117	Medium-quality	Genome-fragment	72.23	HMM-based (lower-bound)	0	None predicted	NONE	1929_0	Clustered
vOTU_02001	1	34488	34487	Medium-quality	Genome-fragment	82.46	AAI-based (high-confidence)	0	Hungatella	NONE	670_0	Clustered
vOTU_02002	6548	66841	60293	High-quality	High-quality	100	AAI-based (high-confidence)	0	Alistipes	YES	0	Outlier
vOTU_02003	61348	103796	42448	High-quality	High-quality	100	AAI-based (high-confidence)	0	Blautia	YES	2057_0	Clustered
vOTU_02004	106631	134678	28047	Medium-quality	Genome-fragment	65.56	AAI-based (high-confidence)	17.72	Salmonella	YES	4_0	Clustered
vOTU_02006	2839	139096	136257	Medium-quality	Genome-fragment	76.83	AAI-based (medium-confidence)	5.52	None predicted	YES	509_7	Clustered/Singleton
vOTU_02007	3835	44185	40350	High-quality	High-quality	93.12	AAI-based (high-confidence)	0	Flavonifractor	YES	1590_0	Clustered
vOTU_02008	1	12444	12443	Low-quality	Genome-fragment	30.94	AAI-based (medium-confidence)	0	None predicted	YES	1515_0	Clustered
vOTU_02009	1	16900	16899	Medium-quality	Genome-fragment	56.88	HMM-based (lower-bound)	0	Collinsella	YES	2164_0	Clustered
vOTU_02010	26334	68260	41926	High-quality	High-quality	91.12	AAI-based (high-confidence)	11.39	Streptococcus	YES	0	Overlap (VC_345/VC_442/VC_444/VC_1089)
vOTU_02011	436	36537	36101	Medium-quality	Genome-fragment	86.89	AAI-based (high-confidence)	14.79	None predicted	NONE	4_0	Clustered
vOTU_02012	1	15981	15980	Medium-quality	Genome-fragment	53.78	HMM-based (lower-bound)	0	Eggerthella	YES	0	Overlap (VC_2165/VC_2166)
vOTU_02013	1	68514	68513	High-quality	High-quality	96.81	AAI-based (high-confidence)	0	Bacteroides	NONE	1915_1	Clustered
vOTU_02016	1	5093	5092	Not-determined	Genome-fragment	NA	NA	0	None predicted	YES	0	Singleton
vOTU_02017	36674	89610	52936	High-quality	High-quality	100	AAI-based (high-confidence)	0	Parabacteroides	YES	1876_1	Clustered/Singleton
vOTU_02018	1	35746	35745	High-quality	High-quality	100	AAI-based (medium-confidence)	7.19	Clostridium	NONE	1497_0	Clustered
vOTU_02019	124536	164392	39856	High-quality	High-quality	99.41	AAI-based (high-confidence)	0	Bifidobacterium	YES	1858_0	Clustered
vOTU_02020	1	16540	16539	Medium-quality	Genome-fragment	72.36	AAI-based (medium-confidence)	0	None predicted	NONE	2058_0	Clustered
vOTU_02021	1	23003	23002	Medium-quality	Genome-fragment	50.68	AAI-based (high-confidence)	0	Erysipelatoclostridium	NONE	1990_0	Clustered
vOTU_02022	1	15606	15605	Medium-quality	Genome-fragment	51.97	HMM-based (lower-bound)	0	Clostridium	NONE	2062_0	Clustered
vOTU_02023	1	90530	90529	High-quality	High-quality	100	AAI-based (high-confidence)	0	None predicted	NONE	1507_1	Clustered
vOTU_02024	1	36917	36916	Complete	High-quality	100	DTR (high-confidence)	0	Bacteroides	YES	1805_0	Clustered
vOTU_02025	1	190531	190530	High-quality	High-quality	100	AAI-based (high-confidence)	1.82	Roseburia	YES	510_0	Clustered/Singleton
vOTU_02026	1	21991	21990	Medium-quality	Genome-fragment	55.06	AAI-based (high-confidence)	0	Bifidobacterium	YES	0	Outlier
vOTU_02027	839	31571	30732	Medium-quality	Genome-fragment	69.33	AAI-based (medium-confidence)	0	None predicted	YES	2100_1	Clustered
vOTU_02028	619311	649669	30358	High-quality	High-quality	93.55	AAI-based (high-confidence)	0	Bacteroides	YES	1817_0	Clustered
vOTU_02029	1	23254	23253	Low-quality	Genome-fragment	47.23	AAI-based (high-confidence)	0	Blautia	YES	0	Outlier
vOTU_02030	1	12713	12712	Low-quality	Genome-fragment	29	AAI-based (high-confidence)	0	None predicted	YES	1527_0	Clustered
vOTU_02031	4067	57580	53513	High-quality	High-quality	96.55	AAI-based (high-confidence)	13.97	Acidaminococcus	NONE	0	Overlap (VC_936/VC_1345)
vOTU_02032	1	127048	127047	High-quality	High-quality	100	AAI-based (high-confidence)	0	Faecalibacterium	NONE	1446_0	Clustered
vOTU_02033	1	13232	13231	Low-quality	Genome-fragment	35.37	AAI-based (medium-confidence)	0	None predicted	YES	0	Outlier
vOTU_02036	386173	441148	54975	High-quality	High-quality	90.56	AAI-based (high-confidence)	6.71	Bacteroides	YES	2134_0	Clustered
vOTU_02037	475586	637039	161453	High-quality	High-quality	100	AAI-based (high-confidence)	3.98	Parabacteroides	YES	1845_0	Clustered
vOTU_02038	151820	205977	54157	Medium-quality	Genome-fragment	89.33	AAI-based (high-confidence)	0	Bacteroides	YES	0	Overlap (VC_1260/VC_1999)
vOTU_02039	15762	67501	51739	High-quality	High-quality	97.63	AAI-based (high-confidence)	10.94	Faecalibacterium	NONE	1536_0	Clustered
vOTU_02040	80953	123040	42087	High-quality	High-quality	99.51	AAI-based (high-confidence)	0	Blautia	YES	1888_0	Clustered
vOTU_02041	1	21438	21437	Low-quality	Genome-fragment	40.92	AAI-based (high-confidence)	0	Salmonella	YES	45_0	Clustered
vOTU_02042	85860	137506	51646	Medium-quality	Genome-fragment	85.53	AAI-based (high-confidence)	0	None predicted	YES	1578_0	Clustered
vOTU_02043	1	15493	15492	Medium-quality	Genome-fragment	86.26	AAI-based (high-confidence)	0	Bifidobacterium	NONE	2097_0	Clustered
vOTU_02045	2060	178317	176257	Medium-quality	Genome-fragment	87.24	HMM-based (lower-bound)	0	None predicted	NONE	2244_0	Clustered
vOTU_02046	1	40920	40919	Low-quality	Genome-fragment	23.58	AAI-based (high-confidence)	0	Ruminococcus	YES	0	Outlier
vOTU_02048	1	19533	19532	Low-quality	Genome-fragment	45.58	AAI-based (high-confidence)	0	Hungatella	NONE	1016_0	Clustered
vOTU_02049	1	44614	44613	High-quality	High-quality	100	AAI-based (high-confidence)	0	Anaerostipes	NONE	1922_0	Clustered
vOTU_02050	72603	158043	85440	High-quality	High-quality	100	AAI-based (high-confidence)	15.08	Bacteroides	NONE	1880_0	Clustered
vOTU_02051	438818	476868	38050	Medium-quality	Genome-fragment	67.75	AAI-based (high-confidence)	0	Salmonella	YES	45_0	Clustered
vOTU_02052	1	50978	50977	Medium-quality	Genome-fragment	63.25	AAI-based (high-confidence)	0	Bacteroides	YES	0	Outlier
vOTU_02053	1	22776	22775	Low-quality	Genome-fragment	40.11	HMM-based (lower-bound)	0	None predicted	YES	675_0	Clustered
vOTU_02054	878	39473	38595	Medium-quality	Genome-fragment	53.24	HMM-based (lower-bound)	0	Flavonifractor	NONE	1895_0	Clustered
vOTU_02055	1	18069	18068	Medium-quality	Genome-fragment	51.2	AAI-based (high-confidence)	0	None predicted	NONE	1772_0	Clustered
vOTU_02056	9519	28130	18611	Low-quality	Genome-fragment	45.3	AAI-based (high-confidence)	0	Salmonella	YES	0	Outlier
vOTU_02057	6656	47817	41161	Medium-quality	Genome-fragment	89.79	AAI-based (high-confidence)	0	Bacteroides	NONE	2031_0	Clustered
vOTU_02058	1	17116	17115	Complete	High-quality	100	ITR (medium-confidence)	0	Eggerthella	NONE	783_0	Clustered
vOTU_02059	72672	233644	160972	High-quality	High-quality	97.89	AAI-based (high-confidence)	0	Eubacterium	NONE	510_3	Clustered/Singleton
vOTU_02060	1	21981	21980	Low-quality	Genome-fragment	43.8	AAI-based (high-confidence)	0	None predicted	NONE	0	Outlier
vOTU_02061	1107	58096	56989	High-quality	High-quality	100	AAI-based (medium-confidence)	0	None predicted	YES	0	Outlier
vOTU_02062	1	57543	57542	High-quality	High-quality	99.7	AAI-based (high-confidence)	0	Roseburia	NONE	0	Overlap (VC_1527/VC_2099)
vOTU_02063	1	5591	5590	Complete	High-quality	100	DTR (high-confidence)	0	None predicted	NONE	1599_0	Clustered
vOTU_02064	1	59358	59357	Medium-quality	Genome-fragment	88.05	AAI-based (high-confidence)	30.68	None predicted	YES	0	Overlap (VC_936/VC_1345)
vOTU_02066	9653	28134	18481	Low-quality	Genome-fragment	34.65	HMM-based (lower-bound)	0	None predicted	YES	0	Outlier
vOTU_02067	1	24665	24664	Low-quality	Genome-fragment	44.48	AAI-based (high-confidence)	25.48	Veillonella	YES	0	Outlier
vOTU_02068	264	23101	22837	Low-quality	Genome-fragment	41.19	AAI-based (high-confidence)	34.74	Colibacter	NONE	0	Overlap (VC_1864/VC_1868)
vOTU_02070	1	40368	40367	Medium-quality	Genome-fragment	88.78	AAI-based (high-confidence)	0	Phascolarctobacterium	YES	1593_0	Clustered
vOTU_02071	1	11477	11476	Low-quality	Genome-fragment	25.67	AAI-based (medium-confidence)	0	None predicted	YES	1885_0	Clustered
vOTU_02072	1	5664	5663	Complete	High-quality	100	DTR (high-confidence)	0	None predicted	YES	1411_0	Clustered
vOTU_02073	1	37734	37733	Complete	High-quality	100	DTR (high-confidence)	0	None predicted	NONE	2084_0	Clustered
vOTU_02074	88904	173613	84709	High-quality	High-quality	100	AAI-based (high-confidence)	21.43	Bacteroides	NONE	1818_2	Clustered
vOTU_02075	1	35745	35744	Medium-quality	Genome-fragment	74.58	AAI-based (medium-confidence)	0	Bacteroides	NONE	2052_0	Clustered
vOTU_02076	1	32950	32949	Medium-quality	Genome-fragment	87.64	AAI-based (high-confidence)	0	None predicted	YES	2143_0	Clustered
vOTU_02077	1	53074	53073	Medium-quality	Genome-fragment	69.49	AAI-based (high-confidence)	15.17	Bacteroides	YES	1818_2	Clustered
vOTU_02078	129103	183747	54644	High-quality	High-quality	100	AAI-based (high-confidence)	0	Salmonella	YES	44_0	Clustered
vOTU_02079	29559	77366	47807	High-quality	High-quality	92.38	AAI-based (high-confidence)	0	Blautia	YES	1572_0	Clustered
vOTU_02080	58755	100000	41245	High-quality	High-quality	100	AAI-based (high-confidence)	0	Bifidobacterium	YES	1884_0	Clustered
vOTU_02081	1	34814	34813	Medium-quality	Genome-fragment	75.94	AAI-based (high-confidence)	0	Bacteroides	NONE	2031_0	Clustered
vOTU_02082	1	52547	52546	High-quality	High-quality	100	AAI-based (high-confidence)	0	Prevotella	NONE	2121_0	Clustered
vOTU_02083	1	49946	49945	Medium-quality	Genome-fragment	83.32	AAI-based (high-confidence)	0	Eubacterium	NONE	0	Outlier
vOTU_02084	1	17214	17213	Medium-quality	Genome-fragment	75.07	AAI-based (medium-confidence)	0	None predicted	NONE	2058_0	Clustered
vOTU_02085	20652	56002	35350	Medium-quality	Genome-fragment	84.34	AAI-based (medium-confidence)	0	None predicted	NONE	189_0	Clustered
vOTU_02086	1	13364	13363	Medium-quality	Genome-fragment	56.38	AAI-based (medium-confidence)	0	None predicted	NONE	1831_0	Clustered
vOTU_02088	1	43030	43029	High-quality	High-quality	100	AAI-based (high-confidence)	0	None predicted	YES	1175_0	Clustered
vOTU_02089	1	29441	29440	Medium-quality	Genome-fragment	83.61	AAI-based (high-confidence)	0	None predicted	NONE	0	Overlap (VC_671/VC_1334/VC_1733)
vOTU_02090	4745	69225	64480	High-quality	High-quality	97.22	AAI-based (high-confidence)	0	Blautia	YES	2177_0	Clustered
vOTU_02091	1	44333	44332	High-quality	High-quality	97.92	AAI-based (high-confidence)	0	Bacteroides	NONE	1026_0	Clustered
vOTU_02092	1	19175	19174	Low-quality	Genome-fragment	35.69	AAI-based (high-confidence)	0	Salmonella	YES	45_0	Clustered
vOTU_02093	1	46895	46894	Complete	High-quality	100	DTR (high-confidence)	0	Bacteroides	YES	878_0	Clustered
vOTU_02095	1	41400	41399	Low-quality	Genome-fragment	19.81	HMM-based (lower-bound)	0	None predicted	NONE	2266_0	Clustered
vOTU_02096	1	80773	80772	High-quality	High-quality	100	AAI-based (high-confidence)	0	Roseburia	YES	2220_0	Clustered
vOTU_02097	1	40649	40648	Complete	High-quality	100	DTR (high-confidence)	0	None predicted	YES	1784_0	Clustered
vOTU_02098	126462	201368	74906	Medium-quality	Genome-fragment	88.39	AAI-based (medium-confidence)	0	Prevotella	YES	0	Outlier
vOTU_02099	1	47004	47003	High-quality	High-quality	100	AAI-based (high-confidence)	0	Bacteroides	NONE	878_0	Clustered
vOTU_02100	46022	74103	28081	Medium-quality	Genome-fragment	59.09	AAI-based (high-confidence)	0	Salmonella	NONE	0	Outlier
vOTU_02101	1	47583	47582	High-quality	High-quality	95.67	AAI-based (high-confidence)	0	Bacteroides	YES	1960_0	Clustered
vOTU_02102	1	20590	20589	Low-quality	Genome-fragment	49.01	AAI-based (high-confidence)	0	Pseudoflavonifractor	YES	2130_0	Clustered
vOTU_02103	15066	95283	80217	High-quality	High-quality	100	AAI-based (high-confidence)	16.57	None predicted	NONE	0	Outlier
vOTU_02104	60768	101538	40770	High-quality	High-quality	100	AAI-based (medium-confidence)	0	Flavonifractor	NONE	1895_0	Clustered
vOTU_02105	1	35580	35579	Medium-quality	Genome-fragment	73.51	AAI-based (medium-confidence)	0	Bacteroides	YES	1819_0	Clustered
vOTU_02106	1	51980	51979	Low-quality	Genome-fragment	23.69	AAI-based (medium-confidence)	0	None predicted	NONE	0	Outlier
vOTU_02107	1	35418	35417	Medium-quality	Genome-fragment	77.93	AAI-based (high-confidence)	11.33	Dialister	YES	857_0	Clustered
vOTU_02108	1	51932	51931	Medium-quality	Genome-fragment	87.7	AAI-based (high-confidence)	8.64	Faecalibacterium	NONE	1591_0	Clustered
vOTU_02109	31944	75155	43211	High-quality	High-quality	100	AAI-based (high-confidence)	0	Roseburia	YES	2135_0	Clustered
vOTU_02110	53582	93991	40409	High-quality	High-quality	99.24	AAI-based (high-confidence)	0	Dialister	YES	1966_0	Clustered
vOTU_02111	1	144497	144496	Medium-quality	Genome-fragment	88.08	AAI-based (high-confidence)	0	Roseburia	YES	510_13	Clustered/Singleton
vOTU_02112	1	68330	68329	High-quality	High-quality	90.31	AAI-based (high-confidence)	22.85	Bacteroides	NONE	1868_0	Clustered
vOTU_02113	14793	53416	38623	High-quality	High-quality	92.99	AAI-based (high-confidence)	0	Blautia	NONE	2057_0	Clustered
vOTU_02114	1	106309	106308	High-quality	High-quality	99.11	AAI-based (high-confidence)	0	Bacteroides	YES	0	Overlap (VC_960/VC_1266)
vOTU_02115	7943	34426	26483	Medium-quality	Genome-fragment	69.34	AAI-based (high-confidence)	0	Blautia	YES	360_0	Clustered
vOTU_02116	1	73745	73744	High-quality	High-quality	97.62	AAI-based (high-confidence)	6.33	Bacteroides	NONE	1915_1	Clustered
vOTU_02117	97181	260547	163366	High-quality	High-quality	100	AAI-based (high-confidence)	4.33	None predicted	YES	1846_1	Clustered/Singleton
vOTU_02118	1	32583	32582	High-quality	High-quality	90.92	AAI-based (high-confidence)	0	Bacteroides	NONE	1806_0	Clustered
vOTU_02119	1	28621	28620	Medium-quality	Genome-fragment	77.42	AAI-based (high-confidence)	0	Salmonella	NONE	919_0	Clustered
vOTU_02120	63451	106259	42808	High-quality	High-quality	93.99	AAI-based (high-confidence)	0	None predicted	YES	1593_0	Clustered
vOTU_02121	1	52824	52823	Low-quality	Genome-fragment	48.1	HMM-based (lower-bound)	0	None predicted	NONE	1931_0	Clustered
vOTU_02122	1	26570	26569	Medium-quality	Genome-fragment	60.29	AAI-based (high-confidence)	0	Flavonifractor	YES	1902_0	Clustered/Singleton
vOTU_02123	1	36983	36982	Medium-quality	Genome-fragment	75.44	AAI-based (medium-confidence)	10.61	None predicted	NONE	678_0	Clustered
vOTU_02124	1	33953	33952	High-quality	High-quality	91.52	AAI-based (medium-confidence)	0	Salmonella	YES	248_0	Clustered
vOTU_02125	1	172476	172475	Complete	High-quality	100	DTR (high-confidence)	0	None predicted	YES	1119_1	Clustered
vOTU_02126	1	17399	17398	Low-quality	Genome-fragment	40.46	AAI-based (high-confidence)	0	Escherichia	YES	0	Outlier
vOTU_02127	4134	44024	39890	High-quality	High-quality	99.51	AAI-based (high-confidence)	0	Dialister	YES	1010_0	Clustered
vOTU_02128	71976	91544	19568	Medium-quality	Genome-fragment	53.9	AAI-based (medium-confidence)	26.38	Escherichia	NONE	0	Overlap (VC_52/VC_2115)
vOTU_02129	357252	379397	22145	Low-quality	Genome-fragment	43.87	HMM-based (lower-bound)	0	None predicted	YES	2151_0	Clustered
vOTU_02131	592	94472	93880	High-quality	High-quality	100	AAI-based (high-confidence)	0	Clostridium	YES	2026_0	Clustered
vOTU_02132	1	35873	35872	Complete	High-quality	100	DTR (high-confidence)	0	None predicted	YES	662_0	Clustered
vOTU_02133	191623	230403	38780	Medium-quality	Genome-fragment	59.01	AAI-based (high-confidence)	0	Bacteroides	NONE	1944_0	Clustered
vOTU_02134	849	29141	28292	Medium-quality	Genome-fragment	84.98	AAI-based (medium-confidence)	0	Akkermansia	YES	0	Outlier
vOTU_02135	1	31128	31127	Medium-quality	Genome-fragment	70.61	AAI-based (medium-confidence)	0	Dialister	YES	1860_0	Clustered
vOTU_02136	1	60656	60655	High-quality	High-quality	99.57	AAI-based (high-confidence)	0	None predicted	YES	1504_1	Clustered
vOTU_02137	1	43223	43222	High-quality	High-quality	100	AAI-based (high-confidence)	5.61	Blautia	YES	1508_0	Clustered
vOTU_02138	2	26869	26867	Medium-quality	Genome-fragment	71.63	AAI-based (high-confidence)	0	None predicted	YES	1583_0	Clustered
vOTU_02139	1	38953	38952	Medium-quality	Genome-fragment	72.53	AAI-based (high-confidence)	0	Salmonella	YES	45_0	Clustered
vOTU_02140	1	98131	98130	Complete	High-quality	100	DTR (high-confidence)	0	Porphyromonas	YES	1102_0	Clustered
vOTU_02141	2	33518	33516	High-quality	High-quality	90.35	AAI-based (medium-confidence)	0	Salmonella	NONE	248_0	Clustered
vOTU_02143	56	24463	24407	Medium-quality	Genome-fragment	65.66	AAI-based (high-confidence)	0	Bifidobacterium	YES	0	Outlier
vOTU_02144	1	5998	5997	Complete	High-quality	100	DTR (high-confidence)	0	Faecalibacterium	YES	1417_0	Clustered
vOTU_02145	1	107261	107260	Complete	High-quality	100	DTR (high-confidence)	0	Escherichia	NONE	923_1	Clustered
vOTU_02146	1	15602	15601	Low-quality	Genome-fragment	38.28	AAI-based (high-confidence)	0	None predicted	YES	1899_0	Clustered
vOTU_02147	1	6354	6353	Complete	High-quality	100	DTR (high-confidence)	0	Bacteroides	NONE	2166_0	Clustered
vOTU_02148	36713	106333	69620	Complete	High-quality	100	Provirus (high-confidence)	8.73	Faecalibacterium	YES	1578_0	Clustered
vOTU_02149	1	38330	38329	Medium-quality	Genome-fragment	79.19	AAI-based (medium-confidence)	0	Bacteroides	YES	1819_0	Clustered
vOTU_02150	1	29895	29894	Medium-quality	Genome-fragment	86.52	AAI-based (high-confidence)	0	Lachnoclostridium	YES	1156_0	Clustered
vOTU_02151	1	18989	18988	Low-quality	Genome-fragment	46.79	AAI-based (high-confidence)	0	Veillonella	NONE	0	Outlier
vOTU_02152	101157	137857	36700	High-quality	High-quality	95.21	AAI-based (high-confidence)	0	Lachnospira	NONE	1839_0	Clustered
vOTU_02153	21935	89384	67449	High-quality	High-quality	100	AAI-based (high-confidence)	0	Ruminococcus	YES	2177_0	Clustered
vOTU_02154	1	11366	11365	Low-quality	Genome-fragment	30.04	AAI-based (high-confidence)	0	Erysipelatoclostridium	NONE	0	Overlap (VC_1512/VC_2110)
vOTU_02155	1159	65622	64463	High-quality	High-quality	100	AAI-based (high-confidence)	3.75	None predicted	NONE	0	Overlap (VC_1337/VC_1448)
vOTU_02156	1	40231	40230	High-quality	High-quality	96.84	AAI-based (high-confidence)	0	Turicibacter	NONE	932_0	Clustered
vOTU_02157	8053	30849	22796	Medium-quality	Genome-fragment	51.83	AAI-based (high-confidence)	0	Fusobacterium	YES	0	Outlier
vOTU_02158	153	28183	28030	Medium-quality	Genome-fragment	86.3	AAI-based (high-confidence)	0	None predicted	NONE	1817_0	Clustered
vOTU_02159	32563	81600	49037	High-quality	High-quality	98.94	AAI-based (high-confidence)	0	Bacteroides	YES	1916_0	Clustered
vOTU_02160	1	15971	15970	Medium-quality	Genome-fragment	53.16	HMM-based (lower-bound)	0	Bifidobacterium	YES	2163_0	Clustered
vOTU_02161	1	53777	53776	Low-quality	Genome-fragment	44.8	HMM-based (lower-bound)	42.71	None predicted	NONE	2228_0	Clustered
vOTU_02162	89527	143771	54244	High-quality	High-quality	100	AAI-based (high-confidence)	0	None predicted	NONE	0	Overlap (VC_30/VC_701)
vOTU_02163	1	25272	25271	Medium-quality	Genome-fragment	62.74	AAI-based (high-confidence)	0	None predicted	YES	1896_0	Clustered
vOTU_02164	1	56434	56433	High-quality	High-quality	96.6	AAI-based (high-confidence)	10.77	Faecalibacterium	YES	1539_2	Clustered
vOTU_02165	2073	33606	31533	Medium-quality	Genome-fragment	88.87	AAI-based (high-confidence)	0	None predicted	YES	1948_0	Clustered
vOTU_02166	48362	112314	63952	Medium-quality	Genome-fragment	89.32	AAI-based (high-confidence)	17.79	Faecalibacterium	NONE	1448_2	Clustered
vOTU_02167	102311	150975	48664	High-quality	High-quality	90.8	AAI-based (high-confidence)	20.02	Parvimonas	NONE	0	Singleton
vOTU_02168	1	28780	28779	Medium-quality	Genome-fragment	84.28	AAI-based (high-confidence)	0	Bacteroides	YES	2038_0	Clustered
vOTU_02169	1	25084	25083	Medium-quality	Genome-fragment	73.42	AAI-based (high-confidence)	0	Fusobacterium	YES	0	Singleton
vOTU_02170	1	51723	51722	Complete	High-quality	100	DTR (high-confidence)	0	Eubacterium	YES	1014_0	Clustered
vOTU_02172	33199	79318	46119	High-quality	High-quality	91.52	AAI-based (high-confidence)	0	None predicted	NONE	870_0	Clustered
vOTU_02173	651	33728	33077	Medium-quality	Genome-fragment	68.34	AAI-based (medium-confidence)	0	None predicted	YES	1767_0	Clustered
vOTU_02174	1	59821	59820	High-quality	High-quality	98.18	AAI-based (high-confidence)	0	None predicted	YES	0	Outlier
vOTU_02175	1	43918	43917	Medium-quality	Genome-fragment	71.55	AAI-based (high-confidence)	0	Bacteroides	YES	0	Outlier
vOTU_02176	1	32420	32419	Medium-quality	Genome-fragment	79.47	AAI-based (high-confidence)	0	Clostridium	NONE	0	Overlap (VC_1012/VC_1829)
vOTU_02177	1	39266	39265	Medium-quality	Genome-fragment	67.06	AAI-based (medium-confidence)	0	None predicted	YES	2113_0	Clustered
vOTU_02178	1	6593	6592	Complete	High-quality	100	DTR (high-confidence)	0	Bacteroides	YES	1765_0	Clustered
vOTU_02179	1	62311	62310	Complete	High-quality	100	DTR (medium-confidence)	0	None predicted	YES	0	Outlier
vOTU_02180	1	38925	38924	Medium-quality	Genome-fragment	53.13	AAI-based (medium-confidence)	0	None predicted	NONE	0	Overlap (VC_2054/VC_2174)
vOTU_02182	1	190804	190803	High-quality	High-quality	100	AAI-based (medium-confidence)	0	None predicted	YES	0	Singleton
vOTU_02183	1	30190	30189	Medium-quality	Genome-fragment	63.92	AAI-based (high-confidence)	0	Salmonella	NONE	36_7	Clustered
vOTU_02184	23285	61668	38383	High-quality	High-quality	95.17	AAI-based (high-confidence)	0	Dialister	NONE	857_0	Clustered
vOTU_02185	1	54646	54645	Medium-quality	Genome-fragment	63.04	AAI-based (high-confidence)	0	None predicted	NONE	0	Outlier
vOTU_02186	1	80632	80631	Complete	High-quality	100	DTR (high-confidence)	0	Roseburia	NONE	2220_0	Clustered
vOTU_02187	16006	65077	49071	High-quality	High-quality	100	AAI-based (medium-confidence)	0	Acinetobacter	YES	576_0	Clustered
vOTU_02188	1	18524	18523	Low-quality	Genome-fragment	39.61	AAI-based (high-confidence)	0	Escherichia	YES	0	Overlap (VC_58/VC_59)
vOTU_02189	347	37582	37235	Medium-quality	Genome-fragment	77.17	AAI-based (high-confidence)	5.33	Salmonella	NONE	45_0	Clustered
vOTU_02190	1	13412	13411	Low-quality	Genome-fragment	26.7	AAI-based (high-confidence)	0	Salmonella	YES	0	Outlier
vOTU_02191	82888	137148	54260	High-quality	High-quality	100	AAI-based (medium-confidence)	0	Parabacteroides	YES	2051_0	Clustered
vOTU_02192	1	54722	54721	Medium-quality	Genome-fragment	87.25	AAI-based (high-confidence)	0	Bifidobacterium	NONE	1803_1	Clustered
vOTU_02193	1	27394	27393	Low-quality	Genome-fragment	34.31	AAI-based (high-confidence)	0	None predicted	NONE	0	Overlap (VC_880/VC_2048)
vOTU_02194	20567	73106	52539	High-quality	High-quality	90	AAI-based (high-confidence)	0	Bacteroides	YES	1868_0	Clustered
vOTU_02195	62223	112089	49866	Low-quality	Genome-fragment	44.95	AAI-based (medium-confidence)	55.08	Prevotella	YES	1943_0	Clustered
vOTU_02196	395794	426322	30528	Medium-quality	Genome-fragment	84.62	AAI-based (high-confidence)	0	None predicted	YES	1581_0	Clustered
vOTU_02198	102803	115141	12338	Low-quality	Genome-fragment	14.78	HMM-based (lower-bound)	0	Fusobacterium	NONE	0	Singleton
vOTU_02199	1	37009	37008	Complete	High-quality	100	DTR (high-confidence)	0	Intestinibacter	YES	1002_0	Clustered
vOTU_02200	1	23105	23104	Medium-quality	Genome-fragment	54.62	AAI-based (high-confidence)	0	Blautia	NONE	1888_0	Clustered
vOTU_02202	193043	287049	94006	Complete	High-quality	100	Provirus (high-confidence)	52.64	None predicted	NONE	0	Overlap (VC_1510/VC_1511)
vOTU_02203	1	7487	7486	Medium-quality	Genome-fragment	55.68	AAI-based (high-confidence)	0	None predicted	YES	2212_0	Clustered
vOTU_02205	1	26878	26877	Medium-quality	Genome-fragment	60.06	AAI-based (medium-confidence)	0	Prevotella	YES	1945_0	Clustered
vOTU_02206	1	15236	15235	Low-quality	Genome-fragment	49.87	HMM-based (lower-bound)	0	None predicted	YES	2164_0	Clustered
vOTU_02207	1	167643	167642	Medium-quality	Genome-fragment	62.22	HMM-based (lower-bound)	0	None predicted	NONE	0	Outlier
vOTU_02208	137619	216426	78807	Medium-quality	Genome-fragment	54.5	AAI-based (high-confidence)	0	Enterocloster	NONE	0	Overlap (VC_1926/VC_2012)
vOTU_02209	852	41754	40902	Low-quality	Genome-fragment	44.88	HMM-based (lower-bound)	18.29	None predicted	NONE	2254_0	Clustered
vOTU_02210	5572	45508	39936	High-quality	High-quality	98.34	AAI-based (high-confidence)	0	Veillonella	YES	1849_0	Clustered
vOTU_02212	146612	186021	39409	Medium-quality	Genome-fragment	70.88	AAI-based (high-confidence)	27.45	None predicted	NONE	1908_0	Clustered
vOTU_02213	1	40472	40471	High-quality	High-quality	98.24	AAI-based (high-confidence)	0	Solobacterium	YES	2089_0	Clustered
vOTU_02214	1	20177	20176	Medium-quality	Genome-fragment	54.48	AAI-based (medium-confidence)	0	None predicted	NONE	0	Outlier
vOTU_02216	41770	88353	46583	Complete	High-quality	100	Provirus (medium-confidence)	31.74	None predicted	YES	670_0	Clustered
vOTU_02217	1715	36329	34614	High-quality	High-quality	99.72	AAI-based (high-confidence)	0	Collinsella	YES	1358_0	Clustered
vOTU_02218	1	70999	70998	High-quality	High-quality	100	AAI-based (high-confidence)	0	Ruminococcus	YES	983_0	Clustered
vOTU_02219	1	35824	35823	Medium-quality	Genome-fragment	59.05	AAI-based (high-confidence)	20.77	None predicted	YES	0	Overlap (VC_936/VC_1551)
vOTU_02220	94379	112152	17773	Low-quality	Genome-fragment	39.54	AAI-based (medium-confidence)	0	Bacteroides	NONE	0	Outlier
vOTU_02221	1	37031	37030	High-quality	High-quality	100	AAI-based (high-confidence)	0	Hungatella	NONE	1251_0	Clustered
vOTU_02222	1	33797	33796	High-quality	High-quality	98.21	AAI-based (high-confidence)	0	Ruminococcus	YES	1905_0	Clustered
vOTU_02224	1	119596	119595	Medium-quality	Genome-fragment	89.54	AAI-based (high-confidence)	0	Faecalibacterium	NONE	1973_0	Clustered
vOTU_02225	49591	90697	41106	Low-quality	Genome-fragment	46.59	AAI-based (high-confidence)	43.71	Bacteroides	NONE	1807_0	Clustered
vOTU_02226	312	40348	40036	Medium-quality	Genome-fragment	67.79	AAI-based (high-confidence)	0	Parabacteroides	NONE	2003_0	Clustered
vOTU_02229	1	25825	25824	Medium-quality	Genome-fragment	55.62	AAI-based (high-confidence)	0	Roseburia	YES	1534_0	Clustered
vOTU_02230	1	41823	41822	High-quality	High-quality	96.74	AAI-based (high-confidence)	0	Veillonella	NONE	1847_0	Clustered
vOTU_02231	1	32845	32844	High-quality	High-quality	96.18	AAI-based (high-confidence)	0	Faecalibacterium	YES	0	Outlier
vOTU_02232	1	30034	30033	Medium-quality	Genome-fragment	82.86	AAI-based (high-confidence)	0	None predicted	YES	1581_0	Clustered
vOTU_02233	1	37405	37404	Medium-quality	Genome-fragment	65.64	AAI-based (high-confidence)	0	Proteus	YES	0	Outlier
vOTU_02234	1	25025	25024	Medium-quality	Genome-fragment	56.25	AAI-based (high-confidence)	0	Anaerostipes	NONE	0	Outlier
vOTU_02235	1	43217	43216	Medium-quality	Genome-fragment	80.97	AAI-based (high-confidence)	0	Faecalibacterium	YES	1594_0	Clustered
vOTU_02236	1	37055	37054	Low-quality	Genome-fragment	40.38	AAI-based (high-confidence)	0	None predicted	YES	0	Outlier
vOTU_02237	1	42643	42642	Medium-quality	Genome-fragment	71.83	AAI-based (medium-confidence)	0	None predicted	NONE	2173_0	Clustered
vOTU_02238	33278	77172	43894	Medium-quality	Genome-fragment	78.21	AAI-based (high-confidence)	0	None predicted	YES	1929_0	Clustered
vOTU_02241	2	58525	58523	Medium-quality	Genome-fragment	61.97	AAI-based (high-confidence)	21.72	Bacteroides	YES	0	Outlier
vOTU_02242	17453	75053	57600	High-quality	High-quality	100	AAI-based (medium-confidence)	0	None predicted	NONE	2153_1	Clustered/Singleton
vOTU_02243	19863	61204	41341	High-quality	High-quality	90.29	AAI-based (high-confidence)	9.28	None predicted	NONE	0	Overlap (VC_1581/VC_1587)
vOTU_02244	45377	109024	63647	High-quality	High-quality	100	AAI-based (high-confidence)	0	Bacteroides	NONE	1875_0	Clustered
vOTU_02245	1	70341	70340	High-quality	High-quality	100	AAI-based (high-confidence)	0	None predicted	NONE	2178_0	Clustered
vOTU_02246	1	34148	34147	Medium-quality	Genome-fragment	89.33	AAI-based (high-confidence)	0	Bifidobacterium	NONE	1883_0	Clustered
vOTU_02247	1	25257	25256	Medium-quality	Genome-fragment	64.11	AAI-based (high-confidence)	0	Bifidobacterium	NONE	1884_0	Clustered
vOTU_02248	899	40398	39499	High-quality	High-quality	92	AAI-based (medium-confidence)	0	Dialister	NONE	1860_0	Clustered
vOTU_02250	1	20388	20387	Low-quality	Genome-fragment	43.23	AAI-based (medium-confidence)	0	None predicted	NONE	933_0	Clustered
vOTU_02251	1	30181	30180	Medium-quality	Genome-fragment	74.63	AAI-based (high-confidence)	0	Blautia	NONE	1508_0	Clustered
vOTU_02252	157365	203127	45762	High-quality	High-quality	93.89	AAI-based (high-confidence)	7.92	None predicted	NONE	1576_0	Clustered
vOTU_02253	1	32858	32857	Medium-quality	Genome-fragment	85.21	AAI-based (high-confidence)	0	Bifidobacterium	YES	1688_0	Clustered
vOTU_02254	60184	135134	74950	High-quality	High-quality	100	AAI-based (high-confidence)	11.16	Bacteroides	YES	1818_2	Clustered
vOTU_02255	1	8826	8825	Low-quality	Genome-fragment	21.43	AAI-based (high-confidence)	0	Lactobacillus	YES	406_0	Clustered
vOTU_02256	62249	100087	37838	High-quality	High-quality	98.56	AAI-based (high-confidence)	0	Collinsella	NONE	1996_0	Clustered
vOTU_02257	1	9306	9305	Low-quality	Genome-fragment	18.78	AAI-based (high-confidence)	0	Salmonella	YES	0	Outlier
vOTU_02258	1	34592	34591	High-quality	High-quality	90.6	AAI-based (high-confidence)	0	Salmonella	YES	38_0	Clustered
vOTU_02259	1	75245	75244	Complete	High-quality	100	DTR (high-confidence)	0	Clostridium	YES	913_0	Clustered
vOTU_02260	39226	57120	17894	Medium-quality	Genome-fragment	56.81	AAI-based (high-confidence)	0	Salmonella	YES	226_0	Clustered
vOTU_02261	1	96197	96196	Complete	High-quality	100	DTR (medium-confidence)	0	Porphyromonas	YES	1102_0	Clustered
vOTU_02262	125443	167919	42476	High-quality	High-quality	96.77	AAI-based (high-confidence)	11.95	Ruminococcus	YES	1839_0	Clustered
vOTU_02263	258988	297257	38269	High-quality	High-quality	95.43	AAI-based (high-confidence)	12.38	Salmonella	YES	4_0	Clustered
vOTU_02264	1	46632	46631	High-quality	High-quality	100	AAI-based (high-confidence)	0	None predicted	NONE	983_0	Clustered
vOTU_02265	73283	142996	69713	High-quality	High-quality	100	AAI-based (high-confidence)	20.64	Faecalibacterium	NONE	1591_0	Clustered
vOTU_02266	36394	72500	36106	High-quality	High-quality	100	AAI-based (high-confidence)	0	Clostridium	NONE	1770_0	Clustered
vOTU_02268	19582	73866	54284	High-quality	High-quality	100	AAI-based (high-confidence)	8.06	Acinetobacter	YES	0	Overlap (VC_1963/VC_1965)
vOTU_02269	2	30981	30979	Low-quality	Genome-fragment	42.39	AAI-based (medium-confidence)	0	None predicted	YES	0	Outlier
vOTU_02270	1	6206	6205	Complete	High-quality	100	DTR (high-confidence)	0	Bacteroides	YES	0	Outlier
vOTU_02271	1	51885	51884	Low-quality	Genome-fragment	39.84	AAI-based (high-confidence)	0	Coprobacillus	NONE	0	Outlier
vOTU_02274	161542	237627	76085	High-quality	High-quality	100	AAI-based (high-confidence)	5.14	Bacteroides	NONE	1915_1	Clustered
vOTU_02275	26361	60168	33807	High-quality	High-quality	100	AAI-based (high-confidence)	0	Dialister	YES	1862_0	Clustered
vOTU_02276	129768	191126	61358	High-quality	High-quality	99.42	AAI-based (high-confidence)	0	Faecalibacterium	YES	1446_0	Clustered
vOTU_02278	1	29742	29741	Complete	High-quality	100	DTR (medium-confidence)	0	None predicted	YES	1773_0	Clustered
vOTU_02279	403821	464824	61003	Medium-quality	Genome-fragment	81.02	AAI-based (high-confidence)	13.13	Anaerostipes	NONE	1546_0	Clustered
vOTU_02282	40415	78103	37688	High-quality	High-quality	93.43	AAI-based (high-confidence)	0	None predicted	NONE	1908_0	Clustered
vOTU_02283	1	16273	16272	Low-quality	Genome-fragment	39.1	AAI-based (high-confidence)	0	Veillonella	NONE	0	Outlier
vOTU_02286	1945	196605	194660	High-quality	High-quality	100	AAI-based (high-confidence)	0	Ruminococcus	YES	0	Overlap (VC_511/VC_1193)
vOTU_02287	1	80009	80008	High-quality	High-quality	99.23	AAI-based (high-confidence)	0	Blautia	NONE	0	Outlier
vOTU_02288	56316	110472	54156	High-quality	High-quality	100	AAI-based (medium-confidence)	12.47	Sutterella	YES	2015_0	Clustered
vOTU_02290	4326	32648	28322	Low-quality	Genome-fragment	36.73	HMM-based (lower-bound)	0	Parabacteroides	YES	2051_0	Clustered
vOTU_02291	184	40706	40522	High-quality	High-quality	93.16	AAI-based (high-confidence)	0	Haemophilus	NONE	0	Overlap (VC_446/VC_456)
vOTU_02292	49857	85986	36129	Medium-quality	Genome-fragment	78.92	AAI-based (high-confidence)	0	Salmonella	YES	57_0	Clustered
vOTU_02293	99417	152836	53419	Medium-quality	Genome-fragment	78.93	AAI-based (high-confidence)	37.71	None predicted	NONE	189_0	Clustered
vOTU_02294	1	32973	32972	High-quality	High-quality	100	AAI-based (high-confidence)	0	Bifidobacterium	YES	2247_0	Clustered
vOTU_02295	41687	78711	37024	Medium-quality	Genome-fragment	85.34	AAI-based (high-confidence)	0	Prevotella	YES	1820_0	Clustered
vOTU_02296	1	37752	37751	High-quality	High-quality	94.42	AAI-based (high-confidence)	0	Bifidobacterium	YES	0	Overlap (VC_1172/VC_1690)
vOTU_02297	31492	77206	45714	High-quality	High-quality	100	AAI-based (high-confidence)	0	Faecalibacterium	YES	1581_0	Clustered
vOTU_02298	10667	53803	43136	High-quality	High-quality	100	AAI-based (high-confidence)	0	Erysipelatoclostridium	NONE	0	Overlap (VC_842/VC_1732)
vOTU_02299	766423	792730	26307	Medium-quality	Genome-fragment	71.68	AAI-based (high-confidence)	0	Bifidobacterium	YES	1168_0	Clustered
vOTU_02300	1	21331	21330	Low-quality	Genome-fragment	36.63	AAI-based (high-confidence)	0	None predicted	YES	0	Outlier
vOTU_02302	1	16532	16531	Low-quality	Genome-fragment	39.96	AAI-based (high-confidence)	0	None predicted	NONE	0	Outlier
vOTU_02303	161	15292	15131	Low-quality	Genome-fragment	33.23	AAI-based (high-confidence)	13.1	Salmonella	NONE	0	Outlier
vOTU_02304	1	15293	15292	Low-quality	Genome-fragment	34.42	AAI-based (medium-confidence)	0	None predicted	YES	0	Outlier
vOTU_02305	1	19838	19837	Medium-quality	Genome-fragment	55.78	AAI-based (medium-confidence)	0	None predicted	NONE	0	Outlier
vOTU_02306	1	66159	66158	Medium-quality	Genome-fragment	63.19	HMM-based (lower-bound)	36.95	Tyzzerella	NONE	0	Overlap (VC_704/VC_983/VC_1445/VC_1888)
vOTU_02307	1	335896	335895	Complete	High-quality	100	DTR (high-confidence)	0	None predicted	YES	2290_0	Clustered
vOTU_02308	344559	398051	53492	High-quality	High-quality	97.28	AAI-based (medium-confidence)	0	None predicted	YES	1929_0	Clustered
vOTU_02309	202268	319196	116928	High-quality	High-quality	100	AAI-based (high-confidence)	0	Bacteroides	NONE	1835_1	Clustered
vOTU_02310	6733	43596	36863	Medium-quality	Genome-fragment	62.09	AAI-based (medium-confidence)	0	None predicted	YES	2173_0	Clustered
vOTU_02311	21252	63286	42034	High-quality	High-quality	100	AAI-based (high-confidence)	0	Bifidobacterium	NONE	1165_0	Clustered
vOTU_02312	1580	40581	39001	High-quality	High-quality	99.86	AAI-based (high-confidence)	0	Ruminococcus	YES	1780_0	Clustered
vOTU_02314	1	32312	32311	Medium-quality	Genome-fragment	78.3	AAI-based (high-confidence)	0	Veillonella	NONE	1849_0	Clustered
vOTU_02315	1	43788	43787	Complete	High-quality	100	DTR (high-confidence)	0	Enterocloster	NONE	1524_0	Clustered
vOTU_02316	361	50800	50439	High-quality	High-quality	99	AAI-based (medium-confidence)	4.7	Faecalibacterium	NONE	911_0	Clustered
vOTU_02317	40108	79152	39044	High-quality	High-quality	100	AAI-based (high-confidence)	0	Ruminococcus	YES	1948_0	Clustered
vOTU_02318	1	31597	31596	Medium-quality	Genome-fragment	82.05	AAI-based (medium-confidence)	0	Bifidobacterium	NONE	1688_0	Clustered
vOTU_02319	1	46363	46362	Medium-quality	Genome-fragment	75.42	AAI-based (high-confidence)	0	Bacteroides	NONE	1259_8	Clustered
vOTU_02320	1	39203	39202	Complete	High-quality	100	DTR (high-confidence)	0	None predicted	YES	2159_0	Clustered
vOTU_02322	307448	357143	49695	Medium-quality	Genome-fragment	87.47	AAI-based (medium-confidence)	0	Erysipelatoclostridium	NONE	2122_0	Clustered
vOTU_02323	39766	89974	50208	High-quality	High-quality	100	AAI-based (high-confidence)	5.11	None predicted	YES	213_0	Clustered
vOTU_02324	1	73154	73153	High-quality	High-quality	98.75	AAI-based (high-confidence)	0	None predicted	NONE	2128_0	Clustered
vOTU_02325	1	18926	18925	Low-quality	Genome-fragment	47.7	AAI-based (high-confidence)	0	None predicted	NONE	1849_0	Clustered
vOTU_02326	36764	63350	26586	Low-quality	Genome-fragment	36.05	AAI-based (medium-confidence)	37.24	None predicted	NONE	1510_0	Clustered/Singleton
vOTU_02327	1	46143	46142	Complete	High-quality	100	DTR (high-confidence)	0	Blautia	NONE	1522_0	Clustered
vOTU_02328	1	34667	34666	Complete	High-quality	100	DTR (high-confidence)	0	None predicted	YES	0	Overlap (VC_584/VC_877)
vOTU_02329	1	28476	28475	Low-quality	Genome-fragment	45.84	AAI-based (high-confidence)	0	None predicted	YES	0	Outlier
vOTU_02330	1	15051	15050	Low-quality	Genome-fragment	41.98	AAI-based (high-confidence)	0	Tyzzerella	YES	1959_0	Clustered
vOTU_02331	42403	125206	82803	High-quality	High-quality	100	AAI-based (high-confidence)	12.67	Bacteroides	YES	1915_1	Clustered
vOTU_02333	214054	267189	53135	High-quality	High-quality	96.36	AAI-based (medium-confidence)	0	Parabacteroides	NONE	2051_0	Clustered
vOTU_02334	1	36318	36317	High-quality	High-quality	100	AAI-based (high-confidence)	0	Escherichia	NONE	919_0	Clustered
vOTU_02335	1	31181	31180	High-quality	High-quality	90.46	AAI-based (high-confidence)	0	None predicted	YES	0	Outlier
vOTU_02337	219359	279805	60446	High-quality	High-quality	100	AAI-based (high-confidence)	8.81	None predicted	YES	38_1	Clustered/Singleton
vOTU_02338	1	25842	25841	Medium-quality	Genome-fragment	67.48	AAI-based (medium-confidence)	0	Clostridium	YES	448_0	Clustered
vOTU_02339	2505	61222	58717	Medium-quality	Genome-fragment	81.24	AAI-based (medium-confidence)	48.82	Ruminococcus	YES	1551_0	Clustered
vOTU_02340	1	21615	21614	Medium-quality	Genome-fragment	54.93	AAI-based (high-confidence)	0	Subdoligranulum	YES	0	Outlier
vOTU_02341	17176	73871	56695	High-quality	High-quality	100	AAI-based (high-confidence)	3.45	Faecalibacterium	NONE	1594_0	Clustered
vOTU_02342	1	46704	46703	Complete	High-quality	100	DTR (high-confidence)	0	Ruminococcus	YES	1522_0	Clustered
vOTU_02343	1	17195	17194	High-quality	High-quality	90.88	AAI-based (medium-confidence)	0	Lachnoclostridium	NONE	1892_0	Clustered
vOTU_02344	2504	48273	45769	Medium-quality	Genome-fragment	75.68	AAI-based (high-confidence)	0	Bacteroides	YES	0	Overlap (VC_1260/VC_1977)
vOTU_02345	1	32136	32135	Medium-quality	Genome-fragment	84.5	AAI-based (high-confidence)	0	Bifidobacterium	YES	1883_0	Clustered
vOTU_02346	1	7473	7472	Low-quality	Genome-fragment	9.14	HMM-based (lower-bound)	0	None predicted	NONE	0	Outlier
vOTU_02347	45913	154649	108736	High-quality	High-quality	98.12	AAI-based (medium-confidence)	0	None predicted	NONE	1845_5	Clustered
vOTU_02348	8489	43950	35461	Medium-quality	Genome-fragment	71.77	HMM-based (lower-bound)	0	None predicted	YES	1773_0	Clustered
vOTU_02349	1	41759	41758	Complete	High-quality	100	DTR (high-confidence)	0	Oscillibacter	YES	1784_1	Clustered
vOTU_02350	92506	159070	66564	Medium-quality	Genome-fragment	59.86	AAI-based (high-confidence)	8.55	None predicted	YES	1977_0	Clustered
vOTU_02351	1	5584	5583	Low-quality	Genome-fragment	24.29	AAI-based (medium-confidence)	0	None predicted	YES	2127_0	Clustered
vOTU_02352	1	170986	170985	High-quality	High-quality	97.63	AAI-based (high-confidence)	0	None predicted	NONE	1119_1	Clustered
vOTU_02353	1	28793	28792	Medium-quality	Genome-fragment	66.2	AAI-based (high-confidence)	0	Sutterella	YES	1082_0	Clustered
vOTU_02354	1	6481	6480	Complete	High-quality	100	ITR (high-confidence)	0	Bacteroides	YES	2166_0	Clustered
vOTU_02355	1	9790	9789	Not-determined	Genome-fragment	NA	NA	0	Ruminococcus	NONE	2210_0	Clustered
vOTU_02356	54480	92457	37977	High-quality	High-quality	98.56	AAI-based (high-confidence)	0	Roseburia	YES	1839_0	Clustered
vOTU_02357	1	48671	48670	Medium-quality	Genome-fragment	89.98	AAI-based (high-confidence)	0	Faecalibacterium	YES	1591_0	Clustered
vOTU_02358	1	82642	82641	Medium-quality	Genome-fragment	60.92	AAI-based (high-confidence)	0	None predicted	YES	914_0	Clustered
vOTU_02359	64566	92474	27908	Medium-quality	Genome-fragment	74.68	AAI-based (high-confidence)	0	None predicted	YES	0	Overlap (VC_1019/VC_1021)
vOTU_02360	1	72691	72690	High-quality	High-quality	94.7	AAI-based (high-confidence)	0	Ruminococcus	NONE	0	Outlier
vOTU_02361	1	20742	20741	Low-quality	Genome-fragment	48.24	AAI-based (medium-confidence)	0	None predicted	NONE	1132_0	Clustered/Singleton
vOTU_02362	17751	58761	41010	High-quality	High-quality	99.56	AAI-based (high-confidence)	6.19	Ruminococcus	NONE	1839_0	Clustered
vOTU_02363	64609	147768	83159	High-quality	High-quality	100	AAI-based (high-confidence)	14.89	Bacteroides	NONE	1915_1	Clustered
vOTU_02364	1	18798	18797	Low-quality	Genome-fragment	47.63	AAI-based (high-confidence)	0	Bifidobacterium	NONE	1884_0	Clustered
vOTU_02365	1	35079	35078	High-quality	High-quality	92.46	AAI-based (high-confidence)	0	Bifidobacterium	NONE	1494_0	Clustered
vOTU_02366	8530	70636	62106	High-quality	High-quality	100	AAI-based (high-confidence)	7.96	Clostridium	YES	0	Overlap (VC_118/VC_900/VC_1451)
vOTU_02367	1	37866	37865	High-quality	High-quality	93.3	AAI-based (high-confidence)	0	Bifidobacterium	YES	1164_0	Clustered
vOTU_02368	163318	190005	26687	Medium-quality	Genome-fragment	83.63	AAI-based (high-confidence)	0	None predicted	NONE	0	Overlap (VC_862/VC_863)
vOTU_02369	1	195855	195854	High-quality	High-quality	100	AAI-based (high-confidence)	0	Porphyromonas	NONE	1102_0	Clustered
vOTU_02370	1	45635	45634	Complete	High-quality	100	DTR (high-confidence)	0	Flavonifractor	NONE	1901_0	Clustered
vOTU_02371	75632	145568	69936	High-quality	High-quality	98.75	AAI-based (high-confidence)	0	Bacteroides	NONE	1915_1	Clustered
vOTU_02372	55693	90915	35222	High-quality	High-quality	90.91	AAI-based (high-confidence)	0	Clostridium	NONE	2061_0	Clustered
vOTU_02373	49270	167101	117831	High-quality	High-quality	99.52	AAI-based (high-confidence)	5.82	Bacteroides	NONE	1835_6	Clustered
vOTU_02374	509	61813	61304	High-quality	High-quality	98.61	AAI-based (high-confidence)	0	None predicted	YES	1447_0	Clustered
vOTU_02375	210194	267915	57721	High-quality	High-quality	99.95	AAI-based (medium-confidence)	0	None predicted	NONE	1919_0	Clustered
vOTU_02376	51468	72678	21210	Low-quality	Genome-fragment	26.5	AAI-based (high-confidence)	48.75	None predicted	YES	0	Outlier
vOTU_02377	15190	58522	43332	High-quality	High-quality	100	AAI-based (high-confidence)	0	Erysipelatoclostridium	NONE	0	Overlap (VC_842/VC_1732)
vOTU_02378	1	113535	113534	High-quality	High-quality	100	AAI-based (high-confidence)	0	None predicted	YES	1835_3	Clustered
vOTU_02379	1	45517	45516	High-quality	High-quality	97.05	AAI-based (high-confidence)	0	Ruminococcus	YES	1988_0	Clustered
vOTU_02380	1	46488	46487	Complete	High-quality	100	DTR (high-confidence)	0	Ruminococcus	NONE	1522_0	Clustered
vOTU_02381	24580	60732	36152	High-quality	High-quality	97.09	AAI-based (high-confidence)	0	None predicted	YES	0	Overlap (VC_51/VC_255)
vOTU_02382	215	18957	18742	Low-quality	Genome-fragment	34	AAI-based (high-confidence)	0	Salmonella	YES	0	Outlier
vOTU_02383	1	46328	46327	High-quality	High-quality	100	AAI-based (high-confidence)	0	Ruminococcus	NONE	1522_0	Clustered
vOTU_02384	1	20894	20893	Medium-quality	Genome-fragment	53.44	AAI-based (high-confidence)	0	Bifidobacterium	YES	1883_0	Clustered
vOTU_02385	1	27784	27783	Medium-quality	Genome-fragment	71.32	AAI-based (high-confidence)	0	Ruminococcus	YES	1839_0	Clustered
vOTU_02386	1	29410	29409	High-quality	High-quality	93.16	AAI-based (high-confidence)	0	Salmonella	NONE	226_0	Clustered
vOTU_02387	1	53232	53231	Medium-quality	Genome-fragment	89.06	AAI-based (high-confidence)	0	Parabacteroides	NONE	1876_4	Clustered
vOTU_02389	1	12980	12979	High-quality	High-quality	97.85	AAI-based (high-confidence)	0	None predicted	NONE	1774_0	Clustered
vOTU_02390	8284	41075	32791	Medium-quality	Genome-fragment	75.62	AAI-based (medium-confidence)	0	Bacteroides	NONE	1962_0	Clustered
vOTU_02391	1	58319	58318	Medium-quality	Genome-fragment	76.96	HMM-based (lower-bound)	0	None predicted	NONE	1767_0	Clustered
vOTU_02392	1	14875	14874	Low-quality	Genome-fragment	49.15	HMM-based (lower-bound)	0	Clostridium	NONE	2062_0	Clustered
vOTU_02393	1	62342	62341	High-quality	High-quality	100	AAI-based (high-confidence)	0	None predicted	NONE	1447_0	Clustered
vOTU_02394	245815	273714	27899	Medium-quality	Genome-fragment	82.23	AAI-based (medium-confidence)	0	Akkermansia	NONE	2139_0	Clustered
vOTU_02395	1	42447	42446	High-quality	High-quality	93.93	AAI-based (high-confidence)	0	Bacteroides	NONE	1026_0	Clustered
vOTU_02397	1	56147	56146	Medium-quality	Genome-fragment	77.5	HMM-based (lower-bound)	0	None predicted	YES	1929_0	Clustered
vOTU_02398	1	89325	89324	Complete	High-quality	100	ITR (medium-confidence)	0	Escherichia	YES	334_0	Clustered
vOTU_02400	1	202197	202196	Medium-quality	Genome-fragment	77.58	HMM-based (lower-bound)	0	None predicted	NONE	2243_0	Clustered
vOTU_02401	1	15767	15766	Medium-quality	Genome-fragment	66.49	AAI-based (medium-confidence)	0	Faecalicatena	YES	2200_0	Clustered
vOTU_02402	39450	90638	51188	High-quality	High-quality	100	AAI-based (medium-confidence)	4.41	Faecalibacterium	YES	911_0	Clustered
vOTU_02405	1	15554	15553	Low-quality	Genome-fragment	37.37	AAI-based (high-confidence)	0	None predicted	NONE	1005_0	Clustered
vOTU_02406	313	40376	40063	Medium-quality	Genome-fragment	75.09	AAI-based (high-confidence)	0	Faecalibacterium	NONE	1594_0	Clustered
vOTU_02407	1	44447	44446	Medium-quality	Genome-fragment	74.19	AAI-based (high-confidence)	0	Subdoligranulum	NONE	1911_0	Clustered
vOTU_02408	233758	261741	27983	Medium-quality	Genome-fragment	61.83	AAI-based (medium-confidence)	0	None predicted	YES	1980_0	Clustered
vOTU_02410	1	24625	24624	Medium-quality	Genome-fragment	51.29	AAI-based (high-confidence)	0	Blautia	NONE	0	Outlier
vOTU_02411	1	44484	44483	High-quality	High-quality	96.13	AAI-based (medium-confidence)	0	Erysipelatoclostridium	NONE	979_0	Clustered
vOTU_02412	1	28638	28637	Low-quality	Genome-fragment	17.12	AAI-based (medium-confidence)	0	None predicted	NONE	1974_0	Clustered
vOTU_02413	71171	97704	26533	Medium-quality	Genome-fragment	55.81	AAI-based (medium-confidence)	0	None predicted	NONE	2118_0	Clustered
vOTU_02414	1	42721	42720	High-quality	High-quality	94.44	AAI-based (high-confidence)	0	Parabacteroides	YES	0	Outlier
vOTU_02415	1	14301	14300	Medium-quality	Genome-fragment	64.18	AAI-based (medium-confidence)	0	Subdoligranulum	YES	2242_0	Clustered
vOTU_02416	3819	80677	76858	High-quality	High-quality	100	AAI-based (high-confidence)	15.42	Bacteroides	YES	1818_2	Clustered
vOTU_02417	100234	156696	56462	Medium-quality	Genome-fragment	84.81	AAI-based (high-confidence)	12.54	None predicted	NONE	1846_0	Clustered
vOTU_02418	2	12548	12546	Low-quality	Genome-fragment	21.91	HMM-based (lower-bound)	14.08	None predicted	YES	0	Outlier
vOTU_02419	1185	31062	29877	Medium-quality	Genome-fragment	79.73	AAI-based (high-confidence)	64.89	None predicted	NONE	1468_0	Clustered
vOTU_02420	194371	265502	71131	High-quality	High-quality	100	AAI-based (high-confidence)	0	Bacteroides	YES	1915_1	Clustered
vOTU_02421	1	42942	42941	Medium-quality	Genome-fragment	88.72	AAI-based (medium-confidence)	0	Bacteroides	YES	1819_0	Clustered
vOTU_02422	514440	550478	36038	High-quality	High-quality	94.15	AAI-based (high-confidence)	0	Bifidobacterium	NONE	1883_0	Clustered
vOTU_02423	1	4010	4009	Low-quality	Genome-fragment	33.77	AAI-based (medium-confidence)	0	Clostridium	NONE	2297_0	Clustered
vOTU_02424	1	40648	40647	Medium-quality	Genome-fragment	83.1	AAI-based (high-confidence)	16.41	None predicted	YES	675_0	Clustered
vOTU_02425	1	56563	56562	Medium-quality	Genome-fragment	71.87	HMM-based (lower-bound)	4.26	Bacteroides	YES	1929_0	Clustered
vOTU_02426	8185	42689	34504	Medium-quality	Genome-fragment	77.1	AAI-based (medium-confidence)	0	Clostridium	YES	1535_0	Clustered
vOTU_02427	1	4951	4950	Low-quality	Genome-fragment	3.72	AAI-based (medium-confidence)	0	None predicted	NONE	1984_0	Clustered
vOTU_02428	135043	190685	55642	Medium-quality	Genome-fragment	85.23	AAI-based (high-confidence)	0	Eubacterium	YES	0	Overlap (VC_1799/VC_2009)
vOTU_02429	1	36387	36386	Medium-quality	Genome-fragment	83.97	AAI-based (high-confidence)	0	Flavonifractor	YES	1590_0	Clustered
vOTU_02430	1	39383	39382	Complete	High-quality	100	DTR (high-confidence)	0	Flavonifractor	YES	1894_0	Clustered
vOTU_02431	343448	387503	44055	High-quality	High-quality	100	AAI-based (high-confidence)	6.49	Akkermansia	YES	2150_0	Clustered
vOTU_02432	1	41514	41513	Complete	High-quality	100	DTR (high-confidence)	0	Intestinibacter	YES	1002_0	Clustered
vOTU_02433	1	28226	28225	Medium-quality	Genome-fragment	75.28	AAI-based (medium-confidence)	0	None predicted	YES	2146_0	Clustered
vOTU_02434	1	54474	54473	Low-quality	Genome-fragment	32.43	AAI-based (high-confidence)	0	None predicted	YES	0	Outlier
vOTU_02435	1	7183	7182	High-quality	High-quality	100	AAI-based (high-confidence)	0	Lawsonibacter	YES	961_0	Clustered
[truncated: 8,646 more rows]
